# Supplementary material
Source: PubMed Central journal article supplement (PMC4178669)
Supplement: AEM.01542-14_zam999105700so1.pdf [file AEM.01542-14_zam999105700so1.pdf]

1 Supplementary Material for:

2 **Combinatorial strategies for improving multiple stress resistance in industrially-relevant**  
3 ***Escherichia coli* strains**

4 Rebecca M. Lennen<sup>1</sup>, Markus J. Herrgård<sup>1‡</sup>

5  
6 **TABLE OF CONTENTS:**

7 **Supplementary Methods:** Error analysis for background strain stress characterization

8 **Table S1:** Oligonucleotide primers and adapters

9 **Table S2:** Additional strains

10 **Table S3.** Numbers of larger colonies identified after selective plating of Tn libraries.

11 **Table S4.** Analysis of isolates with improved growth in liquid culture secondary screening.

12 **Table S5:** Genes depleted in insertions in both W and BL21(DE3) after salt selection as  
13 determined by Tn-Seq

14 **Table S6:** Genes depleted in insertions only in W after salt selection as determined by Tn-Seq

15 **Table S7:** Genes depleted in insertions only in BL21(DE3) after salt selection as determined by  
16 Tn-Seq

17 **Figure S1:** Growth curves of wild-type strains with addition of sodium acetate

18 **Figure S2:** Growth curves of wild-type strains with different initial glucose concentrations

19 **Figure S3:** Growth curves of wild-type strains with addition of NaCl

20 **Figure S4:** Growth curves of wild-type strains with addition of H<sub>2</sub>O<sub>2</sub>

21 **Figure S5:** Growth curves of wild-type strains with step-change increases in temperature

22 **Figure S6:** Growth curves of wild-type strains upon transfer to low pH media

1 **Figure S7:** Growth curves of wild-type strains with addition of sodium acetate and NaCl

2 **Figure S8:** Growth curves of wild-type strains upon transfer to low pH media containing different  
3 NaCl concentrations

4 **Figure S9:** Absolute growth rates of wild-type strains under 8 stress conditions

5 **Figure S10:** Absolute final densities of wild-type strains after growth in 8 stress conditions

6 **Figure S11:** Lag times of wild-type strains grown with different initial glucose concentrations, and  
7 relative and absolute final densities for growth at pH 4.5 with added NaCl.

8 **Figure S12:** Confocal micrographs of *E. coli* W sampled during growth with different NaCl  
9 concentrations

10 **Figure S13:** Serial passaging growth profiles of Tn5 insertion libraries of W and BL21(DE3)

11 **Figure S14:** Elapsed times of observed colony growth of Tn5 insertion mutants on plates  
12 containing different stressors

13 **Figure S15:** Growth curves for short-term selections of Tn5 libraries in M9 and M9 + high salt  
14 conditions

15 **Figure S16:** Percent increases in final cell density of single gene deletion mutants

16 **Figure S17:** Growth curves of BL21(DE3) and BL21(DE3)  $\Delta proV$  in M9 and M9 + 0.6 M NaCl

17 **Figure S18:** Percent changes in growth parameters for double deletion strains compared to  
18 controls

19 **Figure S19:** Additional growth curves of double deletion strains

20 **Figure S20:** Percent changes in growth parameters for triple deletion strains compared to  
21 corresponding double deletion strains

22 **Figure S21:** Percent changes in growth parameters for triple deletion strains compared to W

1 **Figure S22:** Growth curves of W  $\Delta ptsP \Delta yobF yciW::kan$  and relevant controls

2 **Figure S23:** Gene insertion locations in isolated Tn5 mutant strains with false positive losses-of-  
3 function

4 **Supplementary References**

1 **Supplementary Methods:** Error analysis for background strain stress characterization

2 Growth rates, lag times, and final densities were calculated as described in Materials and Methods  
3 using growth curves averaged over all biological replicates. To determine standard errors ( $\delta\mu$ ) for  
4 growth rates ( $\mu$ ), standard deviations ( $\delta X_i$ ) about each mean measurement ( $X_i$ ) used in the  
5 determination of the growth rate were propagated according to:

$$\delta\mu = \sqrt{\sum_{i=1}^n \left(\frac{\partial\mu}{\partial X_i}\right)^2 (\delta X_i)^2}$$

6 For a linear equation with equally spaced measurements in X:

$$\left(\frac{\partial\mu}{\partial X_1}\right) = \left(\frac{\partial\mu}{\partial X_2}\right) = \dots = \left(\frac{\partial\mu}{\partial X_n}\right)$$

7 Thus we can write:

$$\mu = \ln(X - X_0) / (t - t_0)$$

8

$$\frac{\partial\mu}{\partial X} = \frac{1}{\Delta X \Delta t}$$

9

10 Therefore the standard errors in growth rate were determined as:

$$\delta\mu = \frac{1}{\Delta X \Delta t} \sqrt{\sum_{i=1}^n (\delta X_i)^2}$$

11 Final densities ( $X_{\text{final}}$ ) are reported as the average of averages over n timepoints, therefore the standard  
12 errors ( $\delta X_{\text{final}}$ ) can be similarly propagated as:

$$\delta X_{\text{final}} = \frac{1}{n} \sqrt{\sum_{i=1}^n (\delta X_i)^2}$$

13 A MATLAB script was written to perform these calculations using the actual time intervals selected for  
14 determination of growth rates and final densities for each averaged growth curve. For relative growth  
15 rates and densities, an additional propagation for arithmetic operations to calculate percentages was  
16 performed.

**Table S1.** Oligonucleotide primers and adapters used in this study.

| Primer name      | Sequence (5' to 3') <sup>a,b</sup> |
|------------------|------------------------------------|
| 1 Tn5_InvPCR_f1  | GCAGAGCATTACGCTGACTTGAC            |
| 2 Tn5_InvPCR_f2  | GCTCGATGAGTTTTTCTAATCAGAATTGG      |
| 3 Tn5_InvPCR_f3  | TATCCTGATATGAATAAATTGCAGTTTCATTTG  |
| 4 Tn5_InvPCR_r1  | CTATCAACAGGTTGAACTGCTGATC          |
| 5 Tn5_InvPCR_r2  | TCGGATCTATGTCGGGTGCG               |
| 6 Tn5_InvPCR_r3  | GTACGTGAAACATGAGAGCTTAGTAC         |
| 7 pre-Tn5_fwd    | TATCTTCGAATTTCTCACCCGTTTC          |
| 8 pre-Tn5_rev    | GTGTTCTATAAAGGCCCGCTG              |
| 9 rfe-Tn5_fwd    | TGTGCCGGTGTGCTTGTTTTTC             |
| 10 rfe-Tn5_rev   | CAACTTTCAGGCACGCTTAATG             |
| 11 slp-Tn5_fwd   | CTATAACCTGTGGGATTACGGC             |
| 12 slp-Tn5_rev   | AACAAAGGTCACCGGCACTTTC             |
| 13 typA-Tn5_fwd  | CTGTAATGCAGGCGCTGGG                |
| 14 typA-Tn5_rev  | CACCGTGACCGAGGAACAG                |
| 15 nanM-Tn5_fwd  | CTATTGGTTTTGGGGTTGTATTTGTG         |
| 16 nanM-Tn5_rev  | ATGAATAAAACAATAACGGCGCTTGC         |
| 17 gltB-Tn5_fwd  | AACCCGGAACGGTGCAGG                 |
| 18 gltB-Tn5_rev  | AAAACGGCTCGTAAATTTCAACAAACTC       |
| 19 acrB-Tn5_fwd  | CGAACCGTACTCCCAACGAG               |
| 20 acrB-Tn5_rev  | GTAACGCATTACTATCTGACCAAAG          |
| 21 yeeO-Tn5_fwd  | CAACCACACCCAGCCAAG                 |
| 22 yeeO-Tn5_rev  | TTATTAACCCAAATGTTTCGTTGCCG         |
| 23 nagA-Tn5_fwd  | ACCGTTAACGATGGTCTTGGTG             |
| 24 nagA-Tn5_rev  | GATTACGCCAACATTCGTAACGC            |
| 25 dgoD-Tn5_fwd  | AGGTTAGCGCGGTCAACATAAC             |
| 26 dgoD-Tn5_rev  | CGACTTTGTTTCCTATAACGCGG            |
| 27 mk-Tn5_fwd    | GAGCCATAACGGAAAGCTGAG              |
| 28 mk-Tn5_rev    | GTGGGTTATTAATCATCTGATTTACAAAAC     |
| 29 ptsP-Tn5_fwd  | CAACTGCGACTGAGAAAGAATAGC           |
| 30 ptsP-Tn5_rev  | AAAGGTAGCCAGCGCACCAC               |
| 31 proV-Tn5_fwd  | TTGAAGAAGCGAGATATTTGTCATC          |
| 32 proV-Tn5_rev  | GCCTGTAATTTTACCAGCTCATCC           |
| 33 NevgS-Tn5_fwd | AAGTTTTTACCCTATTTTTTTCTTCTCTGTTG   |
| 34 NevgS-Tn5_rev | GAAATCATACTGCTGGTAATGATGTTAC       |
| 35 CevgS-Tn5_fwd | CCAGCAAGTGGCGACTGTC                |
| 36 CevgS-Tn5_rev | GTGGCGATACTGAGGTGCAATAT            |
| 37 evgA-Tn5_fwd  | TAGGATTAGTAAGAAGACTTATAGTGCC       |

|    |    |                 |                                    |
|----|----|-----------------|------------------------------------|
| 1  | 38 | evgA-Tn5_rev    | AATGATGACGATATCAGGCTTAAGTG         |
| 2  | 39 | gltI-Tn5_fwd    | GTTTCAGTGCTTTGTTCATTCGGTTC         |
| 3  | 40 | gltI-Tn5_rev    | CCAAAGATCACGGTGACTCTTTC            |
| 4  | 41 | ytfL-Tn5_fwd    | GGAACCTCGTCAATATCCAGCAC            |
| 5  | 42 | ytfL-Tn5_rev    | GGTTTGATCTCCACGAAGATGAG            |
| 6  | 43 | ygjI-Tn5_fwd    | CTCAGAAGCCGGTGTCTACG               |
| 7  | 44 | ygjI-Tn5_rev    | GCCATAAAGATCCAGGTGGTAAC            |
| 8  | 45 | nagC-Tn5_fwd    | CTGGAGCAAAATACCGTTGAGC             |
| 9  | 46 | nagC-Tn5_rev    | TTGGCCATATTCAGGTCGAACC             |
| 10 | 47 | yobF-Tn5_fwd    | GATAGCGGAGAAGTGTACGAAC             |
| 11 | 48 | yobF-Tn5_rev    | GTGGAAGACGTATCGAGATTTGTG           |
| 12 | 49 | ackA-Tn5_fwd    | CCTGGGCAACGGTGGTTC                 |
| 13 | 50 | ackA-Tn5_rev    | CATCAGCGCAGTGTAGGCAC               |
| 14 | 51 | rcsB-Tn5_fwd    | GAAGGGATCGTGCTGAAACAAG             |
| 15 | 52 | rcsB-Tn5_rev    | GAAGAGAGATAATTCAGCAGGGC            |
| 16 | 53 | PyliE-Tn5_fwd   | GGTTATCGCGCCGCATGTC                |
| 17 | 54 | PyliE-Tn5_rev   | ATAACTATCTGAACGCTGTGCCG            |
| 18 | 55 | P1m0088-Tn5_fwd | CAGCTACGGGATCTTGTCGG               |
| 19 | 56 | P1m0088-Tn5_rev | ATACCGGAACCTGCTTACCAATC            |
| 20 | 57 | mutS-Tn5_fwd    | AAACCGCCAATATTTTACATAACGCC         |
| 21 | 58 | mutS_Tn5_rev    | GACATTTGCGTACCATCCACTTG            |
| 22 | 59 | mutL-Tn5_fwd    | CTGGCAGAAATTCAGTATTGCTAC           |
| 23 | 60 | mutL-Tn5_rev    | GCCGGTTCTGCAAAGTGATTG              |
| 24 | 61 | ygaH-Tn5_fwd    | GCTCTGCTGGTTGTCTCTAC               |
| 25 | 62 | ygaH-Tn5_rev    | GGCGCGAAATTTTAGCATTGTTC            |
| 26 | 63 | yciW-Tn5_fwd    | TTAATATGTCTCACCCAACGCGATT          |
| 27 | 64 | yciW-Tn5_rev    | CACTCTCTCTCCACCCTATTTTC            |
| 28 | 65 | proV_KO_fwd     | GTAATATATCGACATAGACAAATAAAGGAATC   |
| 29 | 66 | proV_KO_rev     | CGCTGGCGTGGTATCCC                  |
| 30 | 67 | proV_colPCR_fwd | GATTTGCTCGCATCAATATTCATGC          |
| 31 | 68 | proV_colPCR_rev | CACCACCGCCGTCAGTC                  |
| 32 | 69 | rfe_KO_fwd      | GGTCTTCGTGGTTATACTTCTGC            |
| 33 | 70 | rfe_KO_rev      | ATTGGTTGTGTCATCACATCCTCAT          |
| 34 | 71 | rfe_colPCR_fwd  | TTGCATATCAAATGGTTAATTTTTGCACAG     |
| 35 | 72 | rfe_colPCR_rev  | CGCCAGCCCCATGCCAAT                 |
| 36 | 73 | slp_KO_fwd      | CTATTATGGTTTTAATATTTGTTGATAAGGATAG |
| 37 | 74 | slp_KO_rev      | CATCTGCATCTTTTCGGTGGTG             |
| 38 | 75 | slp_colPCR_fwd  | GGATATAAACATCAGACAGGTTTACG         |
| 39 | 76 | slp_colPCR_rev  | CTGGTGCGGACATTAACTTTATAATC         |
| 40 | 77 | dctR_KO_fwd     | GTTAATTACCTTTGGCAAACCTGATTATAAAG   |
| 41 | 78 | dctR_KO_rev     | CAGACTCACCGTAAGCCTGAAAT            |

|    |     |                 |                                                          |
|----|-----|-----------------|----------------------------------------------------------|
| 1  | 79  | dctR_colPCR_fwd | GTAAGCTAACTATTATTATTATAAGCCCTG                           |
| 2  | 80  | dctR_colPCR_rev | AAGTGGTCGCCATTGATATCCAG                                  |
| 3  | 81  | evgS_KO_fwd     | GCCTGATGGAAAAATTAGAATGTAAATCAC                           |
| 4  | 82  | evgS_KO_rev     | TTTGAACATTGTGGGAGCCGCTAT                                 |
| 5  | 83  | evgS_colPCR_fwd | ATGGCAAGGATAATAATGACATTGC                                |
| 6  | 84  | evgS_colPCR_rev | GAACAAATTCGCCAGGAGTTCTC                                  |
| 7  | 85  | evgA_KO_fwd     | TTACTACAGGGAGAAGGGAGATG                                  |
| 8  | 86  | evgA_KO_rev     | <u>GGGTAAAACTTCATGTGATTAGCCGATTTTGTACGTTGTGTAG</u>       |
| 9  | 87  | evgA_colPCR_fwd | CCGACTATTTATATGGTATACTTGTCG                              |
| 10 | 88  | evgA_colPCR_rev | CGTAATTCCTTGTTGCTCAGACG                                  |
| 11 | 89  | typA_KO_fwd     | CCGTGTACAATAACGCGCTATTTTC                                |
| 12 | 90  | typA_KO_rev     | CCATCGCTGGCAGGTTTTTTTATG                                 |
| 13 | 91  | typA_colPCR_fwd | TGACCTTTTGATAACCCTTTTTTATGC                              |
| 14 | 92  | typA_colPCR_rev | GACAAAGCTCTCTATTGACGTAACC                                |
| 15 | 93  | gltI_KO_fwd     | CGGGTATCCATGCGTTCTTAAC                                   |
| 16 | 94  | gltI_KO_rev     | TGTCCGTGCTACGTAACAATCG                                   |
| 17 | 95  | gltI_colPCR_fwd | CTAACAGGCACAACACTGCAC                                    |
| 18 | 96  | gltI_colPCR_rev | AGATTGTTACCCAGCGTATTGCG                                  |
| 19 | 97  | nanM_KO_fwd     | GTTATCGCATTTGGTGTGTCATTTAAAC                             |
| 20 | 98  | nanM_KO_rev     | CGCGTAATTGAAATGACAAATTGATAGC                             |
| 21 | 99  | nanM_colPCR_fwd | AATACCATATGACGCCCGATATTAC                                |
| 22 | 100 | nanM_colPCR_rev | CCAGCAACGGTAAGAACATAGTAATA                               |
| 23 | 101 | gltB_KO_fwd     | <u>TAACCGATGCGAAAAGGACAACAAGGGGGCGAATGCGAGGCGCGCGTAT</u> |
| 24 |     |                 | <u>GATTCCGGGGATCCGTCGACC</u>                             |
| 25 | 102 | gltB_KO_rev     | <u>TAAACATTCTGACTCATTGTTGCTACCCCTTACTGCGCCTGCACGCGCA</u> |
| 26 |     |                 | <u>ATGTAGGCTGGAGCTGCTTCCG</u>                            |
| 27 | 103 | gltB_colPCR_fwd | CACCGTATTAACCGATGCGAAAAG                                 |
| 28 | 104 | gltB_colPCR_rev | CGGCTCGTAAATTTCAACAACTCAAT                               |
| 29 | 105 | ytfL_KO_fwd     | GTATTTACACAAATTAATCAACTTCCCC                             |
| 30 | 106 | ytfL_KO_rev     | TATGCAGTAATAAGACGGCTCCTG                                 |
| 31 | 107 | ytfL_colPCR_fwd | CTTTACAGTACCTTACGCTATACTAG                               |
| 32 | 108 | ytfL_colPCR_rev | CATTTGTCAGTGATGTCCGAAGTTAA                               |
| 33 | 109 | nagC_KO_fwd     | ATTTTAAAATCACCAAGACCATCGTTAAC                            |
| 34 | 110 | nagC_KO_rev     | ATGGACTACCCAGAATATTGACAAC                                |
| 35 | 111 | nagC_colPCR_fwd | TTGAGAAACGTCTCGGCACAC                                    |
| 36 | 112 | nagC_colPCR_rev | AATCCCGTGCAAAAATTCGCTG                                   |
| 37 | 113 | nagA_KO_fwd     | <u>TGGCTCCTTGCTCAGGGCAATATTTTAAAATCGGGGGTCAGAATGATT</u>  |
| 38 |     |                 | <u>CCGGGGATCCGTCGACC</u>                                 |
| 39 | 114 | nagA_KO_rev     | <u>AGCTTGTCGCTGGTGTCACTACTTTCTCTTATTGAGTTACGACCTCGT</u>  |
| 40 |     |                 | <u>TTGTAGGCTGGAGCTGCTTCCG</u>                            |
| 41 | 115 | nagA_colPCR_fwd | TGCGATGAACCTTCCACCATG                                    |

|    |                     |                                                            |
|----|---------------------|------------------------------------------------------------|
| 1  | 116 nagA_colPCR_rev | GCTTTGCTCGGCAATCTGAATC                                     |
| 2  | 117 yobF_KO_fwd     | GCGCGTATTCCGTTGCATAAG                                      |
| 3  | 118 yobF_KO_rev     | TTGAACCACTTAACCTGACCTTTAATC                                |
| 4  | 119 yobF_colPCR_fwd | CTGATCGAGACATGTTTAAAAATGGC                                 |
| 5  | 120 yobF_colPCR_rev | TTCAGCCAGAGTTTTTGAAGCCATTA                                 |
| 6  | 121 ygjI_KO_fwd     | AGTTTGCCGCCACCGCTAC                                        |
| 7  | 122 ygjI_KO_rev     | CAGGAAGAGGGAAAAATGCCTG                                     |
| 8  | 123 ygjI_colPCR_fwd | AAGCGTATCGGTTTATCTGCAATAAC                                 |
| 9  | 124 ygjI_colPCR_rev | GCAGTGATTAATTTTCATTGTGTTAATCC                              |
| 10 | 125 acrB_KO_fwd     | GCCTGAACAGTCCAAGTCTTAAC                                    |
| 11 | 126 acrB_KO_rev     | TGCATAAAAAAGGCCGCTTACGC                                    |
| 12 | 127 acrB_colPCR_fwd | GCGTAGTAATAAGTGGGCTGC                                      |
| 13 | 128 acrB_colPCR_rev | GGTTAATACTGGTTTTTCGTATGAGATC                               |
| 14 | 129 yeeO_KO_fwd     | <u>ACGGATTAACAGTCCGCCGTTCTACCGACTGAACTACAGAGGAATCGTT</u>   |
| 15 |                     | <u>GATTCGGGGATCCGTCGACC</u>                                |
| 16 | 130 yeeO_KO_rev     | <u>GTTTGCTGAAATAATCTGCATTTTGTCTGTTTATTCGGACACAACCTGGCT</u> |
| 17 |                     | <u>TTGTAGGCTGGAGCTGCTTCG</u>                               |
| 18 | 131 yeeO_colPCR_fwd | GCAGTGAAGAGGAAATTGATTATCAG                                 |
| 19 | 132 yeeO_colPCR_rev | AGTCCGCCGTTCTACCGAC                                        |
| 20 | 133 dgoD_KO_fwd     | CAGGCAGCAGCATTGTGTTAAGG                                    |
| 21 | 134 dgoD_KO_rev     | TGCTGTTTTTAGTGCCCGATGAG                                    |
| 22 | 135 dgoD_colPCR_fwd | AAAACCTGGCGCAGTGGATAG                                      |
| 23 | 136 dgoD_colPCR_rev | CCGGCTTTGCTGCATTAACGG                                      |
| 24 | 137 mk_KO_fwd       | <u>TCTGCGACACTCGCAGTACCGACGACATGGAGTAAAAATG</u>            |
| 25 | 138 mk_KO_rev       | ATCCTCTGGGCAAAGCGAGTT                                      |
| 26 | 139 mk_colPCR_fwd   | TCCCTGAATGTGACGCAAATCAC                                    |
| 27 | 140 mk_colPCR_rev   | TGCCATGGTTATTCCACAAACG                                     |
| 28 | 141 ptsP_KO_fwd     | CCACAAAACGCATCTGCTTATCG                                    |
| 29 | 142 ptsP_KO_rev     | CGAATAATAGCACAAAGGGGACC                                    |
| 30 | 143 ptsP_colPCR_fwd | GTGGTGTCATTTTAAACGTGATGTC                                  |
| 31 | 144 ptsP_colPCR_rev | CTGTCACCACAAGTTCTTGTTATTTT                                 |
| 32 | 145 ackA_KO_fwd     | <u>TGGCTCCCTGACGTTTTTTTTAGCCACGTATCAATTATAGGTA</u>         |
| 33 |                     | <u>GATTCGGGGATCCGTCGACC</u>                                |
| 34 | 146 ackA_KO_rev     | <u>AGCTGAGCTGGCGGTGTGAAATCAGGCAGTCAGGCGGCTCGCTGTAGGC</u>   |
| 35 |                     | <u>TGGAGCTGCTTCG</u>                                       |
| 36 | 147 ackA_colPCR_fwd | CAAAATGGCATAGACTCAAGATATTTT                                |
| 37 | 148 ackA_colPCR_rev | CGGTAGGGATCAGCATAATAATAC                                   |
| 38 | 149 rcsB_KO_fwd     | ACAGTTATGTCAAGAGCTTGCTGTA                                  |
| 39 | 150 rcsB_KO_rev     | <u>TGCCAGATAAGACACTAACGCGTCTTATCTGGCCTACAGATGATTAGTC</u>   |
| 40 |                     | <u>TTTATCTGCCGGACT</u>                                     |
| 41 | 151 rcsB_colPCR_fwd | AAATCTGGTACCCGGCAAGC                                       |



|    |                                      |                                                           |
|----|--------------------------------------|-----------------------------------------------------------|
| 1  | 152 rcsB_colPCR_rev                  | ACGCGTCTTATCTGGCCTAC                                      |
| 2  | 153 P1m0088_KO_fwd                   | <u>GAGTGTATTGTTATTATTAAATACGCAGTGTGACAAGTGAGCAAAAGAT</u>  |
| 3  |                                      | <u>GATTCGGGGATCCGTCGACC</u>                               |
| 4  | 154 P1m0088_KO_rev                   | <u>TTTCTCTCTGATTAAACGAGCCGACCGGTTTCAGAAATCAAATTCTATTG</u> |
| 5  |                                      | <u>CTGTAGGCTGGAGCTGCTTCG</u>                              |
| 6  | 155 P1m0088_colPCR_fwd               | GTCTAAACTGCAGGCTTTGTCTG                                   |
| 7  | 156 P1m0088_colPCR_rev               | GTGTCATCGCTGCGAAAGTTG                                     |
| 8  | 157 yciW_KO_fwd                      | <u>CCGCCTTGCGTCAGGATAACGATTTCTTTACGACCAAGGAGCGCCCAT</u>   |
| 9  |                                      | <u>GATTCGGGGATCCGTCGACC</u>                               |
| 10 | 158 yciW_KO_rev                      | <u>TTTACGCGAATCTGTCTGACGCGCAAGGTTAATATGTCTCACCCAACG</u>   |
| 11 |                                      | <u>CTGTAGGCTGGAGCTGCTTCG</u>                              |
| 12 | 159 yciW_colPCR_fwd                  | CGTTCCTGCCGCCCCGTTATC                                     |
| 13 | 160 yciW_colPCR_rev                  | TTACCACCCCTTCAGCGCG                                       |
| 14 | 161 ygaH_KO_fwd                      | <u>CACTGCGTTAATCCAGGCATTCTGGCAAGGAGCGCCCCGATGAGCTATGA</u> |
| 15 |                                      | <u>GATTCGGGGATCCGTCGACC</u>                               |
| 16 | 162 ygaH_KO_rev                      | <u>TATTGTTTTAGAAAAATGATTCTTGTGGTTATATAATCGCCATCACTT</u>   |
| 17 |                                      | <u>TTGTAGGCTGGAGCTGCTTCG</u>                              |
| 18 | 163 ygaH_colPCR_fwd                  | TCCAGCGCAAACAATCTCTTTGC                                   |
| 19 | 164 ygaH_colPCR_rev                  | CGGCTGGCGCGAAATTTTAG                                      |
| 20 | 165 Keio_kan_fwd                     | ATACGCTTGATCCGGCTACCT                                     |
| 21 | 166 BioTEG-Tn5seq_fwd <sup>c,f</sup> | <u>AATGATACGGCGACCACCGAGATCTACACTCTTTCCCTACACGACGCTC</u>  |
| 22 |                                      | <u>TTCCGATCTCAGGCATGCAAGCTTCAGGGTTG</u>                   |
| 23 | 167 Tn5seq_rev <sup>g</sup>          | CAAGCAGAAGACGGCATAACGAGAT                                 |
| 24 | 168 UAD_tail <sup>d,f</sup>          | GCTCTTCCGATCT                                             |
| 25 | 169 AD002 <sup>e,g</sup>             | GATCGGAAGAGCACACGTCTGAACTCCAGTCACCGATGTATCTCGTATG         |
| 26 |                                      | CCGTCTTCTGCTTG                                            |
| 27 | 170 AD006 <sup>e,g</sup>             | GATCGGAAGAGCACACGTCTGAACTCCAGTCACGCCAATATCTCGTATG         |
| 28 |                                      | CCGTCTTCTGCTTG                                            |
| 29 | 171 AD012 <sup>e,g</sup>             | GATCGGAAGAGCACACGTCTGAACTCCAGTCACCTTGTAATCTCGTATG         |
| 30 |                                      | CCGTCTTCTGCTTG                                            |
| 31 | 172 AD015 <sup>e,g</sup>             | GATCGGAAGAGCACACGTCTGAACTCCAGTCACATGTCAGAATCTCGTA         |
| 32 |                                      | TGCCGTCTTCTGCTTG                                          |
| 33 | 173 AD005 <sup>e,g</sup>             | GATCGGAAGAGCACACGTCTGAACTCCAGTCACACAGTGATCTCGTATG         |
| 34 |                                      | CCGTCTTCTGCTTG                                            |
| 35 | 174 AD007 <sup>e,g</sup>             | GATCGGAAGAGCACACGTCTGAACTCCAGTCACCAGATCATCTCGTATG         |
| 36 |                                      | CCGTCTTCTGCTTG                                            |
| 37 |                                      |                                                           |

<sup>a</sup> Primers containing 'KO' in the name were used for amplification of cassettes derived from pKD13 from Keio collection strains. Primers containing 'colPCR' were used colony PCR verification of chromosomal gene insertions and deletions.

<sup>b</sup> 5' overhangs during PCR amplification are underlined

<sup>c</sup> Contains a 5'-biotin-tetraethyleneglycol (TEG) modification

<sup>d</sup> Contains a 3'-phosphorothioate modification between the final two nucleotides

<sup>e</sup> Contains a 5'-phosphate modification

1 <sup>f</sup> Oligonucleotide sequences © 2007-2012 Illumina, Inc. All rights reserved. Derivative works created by Illumina  
2 customers are authorized for use with Illumina instruments and products only. All other uses are strictly prohibited.  
3 <sup>g</sup> Oligonucleotide sequences © 2007-2012 Illumina, Inc. All rights reserved.  
4

1 **Table S2.** Additional strains used in this study.

| <b>Strain</b> | <b>Relevant genotype/property<sup>a</sup></b> | <b>Source/<br/>Reference</b> |
|---------------|-----------------------------------------------|------------------------------|
| JW2652-1      | BW25113 <i>proV::kan</i>                      | 1                            |
| JW3758-1      | BW25113 <i>rfe::kan</i>                       | 1                            |
| JW3474-1      | BW25113 <i>slp::kan</i>                       | 1                            |
| JW3475-1      | BW25113 <i>dctR::kan</i>                      | 1                            |
| JW5571-1      | BW25113 <i>typA::kan</i>                      | 1                            |
| JW2367-1      | BW25113 <i>evgS::kan</i>                      | 1                            |
| JW2366-1      | BW25113 <i>evgA::kan</i>                      | 1                            |
| JW2205-1      | BW25113 <i>rcsB::kan</i>                      | 1                            |
| JW5092-1      | BW25113 <i>gltI::kan</i>                      | 1                            |
| JW5777-1      | BW25113 <i>nanM::kan</i>                      | 1                            |
| JW4177-1      | BW25113 <i>ytfL::kan</i>                      | 1                            |
| JW5512-1      | BW25113 <i>ygjI::kan</i>                      | 1                            |
| JW0451-1      | BW25113 <i>acrB::kan</i>                      | 1                            |
| JW0662-1      | BW25113 <i>nagC::kan</i>                      | 1                            |
| JW1813-1      | BW25113 <i>yobF::kan</i>                      | 1                            |
| JW5629-1      | BW25113 <i>dgoD::kan</i>                      | 1                            |
| JW0602-1      | BW25113 <i>rnk::kan</i>                       | 1                            |
| JW2797-1      | BW25113 <i>ptsP::kan</i>                      | 1                            |
| RL136         | BL21(DE3) <i>proV::kan</i>                    | This work                    |
| RL137         | W <i>rfe::kan</i>                             | This work                    |
| RL138         | W <i>slp::kan</i>                             | This work                    |
| RL139         | W <i>dctR::kan</i>                            | This work                    |
| RL140         | W <i>typA::kan</i>                            | This work                    |
| RL141         | W <i>evgS::kan</i>                            | This work                    |
| RL142         | W <i>evgA::kan</i>                            | This work                    |
| RL143         | W <i>rcsB::kan</i>                            | This work                    |
| RL144         | BL21(DE3) <i>gltI::kan</i>                    | This work                    |
| RL145         | BL21(DE3) <i>nanM::kan</i>                    | This work                    |
| RL146         | BL21(DE3) <i>gltB::kan</i>                    | This work                    |
| RL147         | BL21(DE3) <i>ytfL::kan</i>                    | This work                    |
| RL148         | BL21(DE3) <i>ygjI::kan</i>                    | This work                    |
| RL149         | BL21(DE3) <i>acrB::kan</i>                    | This work                    |
| RL150         | BL21(DE3) <i>yeeO::kan</i>                    | This work                    |
| RL151         | W <i>nagC::kan</i>                            | This work                    |
| RL152         | W <i>nagA::kan</i>                            | This work                    |

|       |                                 |           |
|-------|---------------------------------|-----------|
| RL153 | W <i>yobF::kan</i>              | This work |
| RL154 | W <i>dgoD::kan</i>              | This work |
| RL155 | W <i>rnk::kan</i>               | This work |
| RL156 | W pRK1[ECW_P1m0088::kan]        | This work |
| RL157 | W <i>ackA::kan</i>              | This work |
| RL158 | W <i>ptsP::kan</i>              | This work |
| RL159 | W <i>yciW::kan</i>              | This work |
| RL160 | W <i>ygaH::kan</i>              | This work |
| RL161 | BL21(DE3) $\Delta$ <i>proV</i>  | This work |
| RL162 | W $\Delta$ <i>rfe</i>           | This work |
| RL163 | W $\Delta$ <i>slp</i>           | This work |
| RL164 | W $\Delta$ <i>dctR</i>          | This work |
| RL165 | W $\Delta$ <i>typA</i>          | This work |
| RL166 | W $\Delta$ <i>evgS</i>          | This work |
| RL167 | W $\Delta$ <i>evgA</i>          | This work |
| RL168 | W $\Delta$ <i>rcsB</i>          | This work |
| RL169 | BL21(DE3) $\Delta$ <i>gltI</i>  | This work |
| RL170 | BL21(DE3) $\Delta$ <i>gltB</i>  | This work |
| RL171 | BL21(DE3) $\Delta$ <i>ytfL</i>  | This work |
| RL172 | BL21(DE3) $\Delta$ <i>ygiI</i>  | This work |
| RL173 | BL21(DE3) $\Delta$ <i>acrB</i>  | This work |
| RL174 | BL21(DE3) $\Delta$ <i>yeeO</i>  | This work |
| RL175 | W $\Delta$ <i>nagC</i>          | This work |
| RL176 | W $\Delta$ <i>nagA</i>          | This work |
| RL177 | W $\Delta$ <i>yobF</i>          | This work |
| RL178 | W $\Delta$ <i>dgoD</i>          | This work |
| RL179 | W $\Delta$ <i>rnk</i>           | This work |
| RL180 | W pRK1[ $\Delta$ ECW_P1m0088]   | This work |
| RL181 | W $\Delta$ <i>ackA</i>          | This work |
| RL182 | W $\Delta$ <i>ptsP</i>          | This work |
| RL183 | W $\Delta$ <i>yciW</i>          | This work |
| RL184 | W $\Delta$ <i>ygaH</i>          | This work |
| RL185 | W $\Delta$ <i>rfe evgA::kan</i> | This work |
| RL186 | W $\Delta$ <i>rfe typA::kan</i> | This work |
| RL187 | W $\Delta$ <i>rfe rcsB::kan</i> | This work |
| RL188 | W $\Delta$ <i>rfe nagC::kan</i> | This work |
| RL189 | W $\Delta$ <i>rfe ptsP::kan</i> | This work |
| RL190 | W $\Delta$ <i>rfe yobF::kan</i> | This work |
| RL191 | W $\Delta$ <i>rfe nagA::kan</i> | This work |

|       |                          |           |
|-------|--------------------------|-----------|
| RL192 | <i>W Δrfe ackA::kan</i>  | This work |
| RL193 | <i>W Δrfe ygaH::kan</i>  | This work |
| RL194 | <i>W Δrfe yciW::kan</i>  | This work |
| RL195 | <i>W ΔevgA typA::kan</i> | This work |
| RL196 | <i>W ΔevgA rcsB::kan</i> | This work |
| RL197 | <i>W ΔevgA nagC::kan</i> | This work |
| RL198 | <i>W ΔevgA ptsP::kan</i> | This work |
| RL199 | <i>W ΔevgA yobF::kan</i> | This work |
| RL200 | <i>W ΔevgA nagA::kan</i> | This work |
| RL201 | <i>W ΔevgA ackA::kan</i> | This work |
| RL202 | <i>W ΔevgA ygaH::kan</i> | This work |
| RL203 | <i>W ΔevgA yciW::kan</i> | This work |
| RL204 | <i>W ΔtypA rcsB::kan</i> | This work |
| RL205 | <i>W ΔtypA nagC::kan</i> | This work |
| RL206 | <i>W ΔtypA yobF::kan</i> | This work |
| RL207 | <i>W ΔtypA nagA::kan</i> | This work |
| RL208 | <i>W ΔtypA ackA::kan</i> | This work |
| RL209 | <i>W ΔtypA ygaH::kan</i> | This work |
| RL210 | <i>W ΔtypA yciW::kan</i> | This work |
| RL211 | <i>W ΔrcsB nagC::kan</i> | This work |
| RL212 | <i>W ΔrcsB ptsP::kan</i> | This work |
| RL213 | <i>W ΔrcsB yobF::kan</i> | This work |
| RL214 | <i>W ΔrcsB nagA::kan</i> | This work |
| RL215 | <i>W ΔrcsB ackA::kan</i> | This work |
| RL216 | <i>W ΔrcsB ygaH::kan</i> | This work |
| RL217 | <i>W ΔrcsB yciW::kan</i> | This work |
| RL218 | <i>W ΔnagC ptsP::kan</i> | This work |
| RL219 | <i>W ΔnagC yobF::kan</i> | This work |
| RL220 | <i>W ΔnagC ackA::kan</i> | This work |
| RL221 | <i>W ΔnagC ygaH::kan</i> | This work |
| RL222 | <i>W ΔnagC yciW::kan</i> | This work |
| RL223 | <i>W ΔptsP typA::kan</i> | This work |
| RL224 | <i>W ΔptsP yobF::kan</i> | This work |
| RL225 | <i>W ΔptsP nagA::kan</i> | This work |
| RL226 | <i>W ΔptsP ackA::kan</i> | This work |
| RL227 | <i>W ΔptsP ygaH::kan</i> | This work |
| RL228 | <i>W ΔptsP yciW::kan</i> | This work |
| RL229 | <i>W ΔyobF nagA::kan</i> | This work |
| RL230 | <i>W ΔyobF ackA::kan</i> | This work |

|       |                                |           |
|-------|--------------------------------|-----------|
| RL231 | <i>W ΔyobF ygaH::kan</i>       | This work |
| RL232 | <i>W ΔyobF yciW::kan</i>       | This work |
| RL233 | <i>W ΔnagA ackA::kan</i>       | This work |
| RL234 | <i>W ΔnagA ygaH::kan</i>       | This work |
| RL235 | <i>W ΔnagA yciW::kan</i>       | This work |
| RL236 | <i>W ΔackA ygaH::kan</i>       | This work |
| RL237 | <i>W ΔackA yciW::kan</i>       | This work |
| RL238 | <i>W ΔygaH yciW::kan</i>       | This work |
| RL239 | <i>W Δrfe ΔevgA</i>            | This work |
| RL240 | <i>W Δrfe ΔtypA</i>            | This work |
| RL241 | <i>W Δrfe ΔptsP</i>            | This work |
| RL242 | <i>W ΔevgA ΔtypA</i>           | This work |
| RL243 | <i>W ΔevgA ΔptsP</i>           | This work |
| RL244 | <i>W ΔtypA ΔptsP</i>           | This work |
| RL245 | <i>W ΔevgA ΔyciW</i>           | This work |
| RL246 | <i>W ΔtypA ΔyobF</i>           | This work |
| RL247 | <i>W ΔtypA ΔyciW</i>           | This work |
| RL248 | <i>W ΔptsP ΔyobF</i>           | This work |
| RL249 | <i>W ΔptsP ΔyciW</i>           | This work |
| RL250 | <i>W Δrfe ΔevgA typA::kan</i>  | This work |
| RL251 | <i>W Δrfe ΔevgA ptsP::kan</i>  | This work |
| RL252 | <i>W Δrfe ΔevgA yobF::kan</i>  | This work |
| RL253 | <i>W Δrfe ΔtypA ptsP::kan</i>  | This work |
| RL254 | <i>W Δrfe ΔtypA yobF::kan</i>  | This work |
| RL255 | <i>W Δrfe ΔptsP yobF::kan</i>  | This work |
| RL256 | <i>W Δrfe ΔptsP ackA::kan</i>  | This work |
| RL257 | <i>W ΔevgA ΔtypA ptsP::kan</i> | This work |
| RL258 | <i>W ΔevgA ΔtypA yobF::kan</i> | This work |
| RL259 | <i>W ΔevgA ΔtypA ackA::kan</i> | This work |
| RL260 | <i>W ΔevgA ΔtypA yciW::kan</i> | This work |
| RL261 | <i>W ΔevgA ΔptsP yobF::kan</i> | This work |
| RL262 | <i>W ΔevgA ΔptsP yciW::kan</i> | This work |
| RL263 | <i>W ΔtypA ΔptsP yobF::kan</i> | This work |
| RL264 | <i>W ΔtypA ΔptsP ackA::kan</i> | This work |
| RL265 | <i>W ΔtypA ΔptsP yciW::kan</i> | This work |
| RL266 | <i>W ΔevgA ΔyciW yobF::kan</i> | This work |
| RL267 | <i>W ΔevgA ΔyciW ackA::kan</i> | This work |
| RL268 | <i>W ΔevgA ΔyciW ygaH::kan</i> | This work |
| RL269 | <i>W ΔtypA ΔyobF ackA::kan</i> | This work |

|       |                                |           |
|-------|--------------------------------|-----------|
| RL270 | <i>W ΔtypA ΔyobF yciW::kan</i> | This work |
| RL271 | <i>W ΔtypA ΔyciW ackA::kan</i> | This work |
| RL272 | <i>W ΔptsP ΔyobF ackA::kan</i> | This work |
| RL273 | <i>W ΔptsP ΔyobF yciW::kan</i> | This work |
| RL274 | <i>W ΔptsP ΔyciW ackA::kan</i> | This work |

---

1 **Table S3.** Numbers of larger colonies identified after selective plating of Tn libraries.

|                  | selection condition     | direct plating | serially passaged <sup>2</sup> |
|------------------|-------------------------|----------------|--------------------------------|
| <b>W</b>         | 0.6 M NaCl              | 2              | 5                              |
|                  | 15 g/L NaAc             | 0              | 3                              |
|                  | 5 g/L NaAc + 0.4 M NaCl | 0              | > 50                           |
|                  | pH 5.5 + 0.4 M NaCl     | 28             | 8                              |
|                  | pH 4.5                  | 0              | > 50                           |
| <b>BL21(DE3)</b> | 0.6 M NaCl              | 12             | 0                              |
|                  | 15 g/L NaAc             | 0              | 2                              |
|                  | 5 g/L NaAc + 0.4 M NaCl | 1              | > 50                           |
|                  | pH 5.5 + 0.4 M NaCl     | 0              | 0                              |
|                  | pH 4.5                  | 23             | 0                              |



1 **Table S4.** Total number of Tn library selection isolates tested and the number of isolates identified as  
 2 exhibiting qualitatively improved growth in liquid culture secondary screening.

3

|                  | selection condition     | isolates tested | isolates with improved growth | isolates tested | isolates with improved growth |
|------------------|-------------------------|-----------------|-------------------------------|-----------------|-------------------------------|
| <b>W</b>         | 0.6 M NaCl              | 2               | 2                             | 5               | 3                             |
|                  | 15 g/L NaAc             | 0               | 0                             | 3               | 3                             |
|                  | 5 g/L NaAc + 0.4 M NaCl | 0               | 0                             | 14              | 9                             |
|                  | pH 5.5 + 0.4 M NaCl     | 28              | 13                            | 8               | 8                             |
|                  | pH 4.5                  | 0               | 0                             | 6               | 0                             |
| <b>BL21(DE3)</b> | 0.6 M NaCl              | 12              | 1                             | 0               | 0                             |
|                  | 15 g/L NaAc             | 0               | 0                             | 2               | 2                             |
|                  | 5 g/L NaAc + 0.4 M NaCl | 1               | 0                             | 15              | 10                            |
|                  | pH 5.5 + 0.4 M NaCl     | 0               | 0                             | 0               | 0                             |
|                  | pH 4.5                  | 23              | 0                             | 0               | 0                             |

4

1 **Table S5.** Genes depleted in insertions in both W and BL21(DE3) following selection of Tn5 libraries  
2 in M9 + 0.5-0.6 M NaCl compared to selection in M9. Genes are only shown with adjusted  $P < 0.05$   
3 with the more conservative Bonferroni correction at top, and with the less conservative Benjamini  
4 Hochberg correction at bottom.

| gene        | description                                                                   | W           |         | BL21(DE3)   |         |
|-------------|-------------------------------------------------------------------------------|-------------|---------|-------------|---------|
|             |                                                                               | fold change | P-value | fold change | P-value |
| <i>tolC</i> | TolC outer membrane channel                                                   | -13.91      | 0.00    | -2.13       | 0.00    |
| <i>rfaP</i> | lipopolysaccharide core heptose (I) kinase                                    | -12.90      | 0.00    | -2.95       | 0.00    |
| <i>treR</i> | TreR DNA-binding transcriptional repressor                                    | -12.20      | 0.00    | -10.40      | 0.00    |
| <i>otsB</i> | trehalose-6-phosphate phosphatase                                             | -11.80      | 0.00    | -12.50      | 0.00    |
| <i>nadR</i> | NadR DNA-binding transcriptional repressor and NMN adenylyltransferase        | -11.75      | 0.00    | -4.08       | 0.00    |
| <i>sbp</i>  | sulfate/thiosulfate ABC transporter, periplasmic binding protein Sbp          | -10.97      | 0.00    | -2.10       | 0.01    |
| <i>oppF</i> | murein tripeptide/peptide ABC transporter, putative ATP binding subunit       | -10.62      | 0.00    | -8.23       | 0.00    |
| <i>prkB</i> | predicted phosphoribulokinase                                                 | -10.57      | 0.00    | -3.05       | 0.00    |
| <i>rfaG</i> | lipopolysaccharide glucosyltransferase I                                      | -9.94       | 0.00    | -2.90       | 0.00    |
| <i>mrcA</i> | peptidoglycan synthetase; penicillin-binding protein 1A                       | -9.28       | 0.00    | -4.06       | 0.00    |
| <i>fepB</i> | ferric enterobactin ABC transporter, periplasmic binding protein              | -8.85       | 0.00    | -5.02       | 0.00    |
| <i>lpoA</i> | outer membrane lipoprotein – activator of PBP1A activity                      | -7.90       | 0.00    | -5.01       | 0.00    |
| <i>clpA</i> | ClpA ATP-dependent protease specificity component and chaperone               | -7.79       | 0.00    | -9.04       | 0.00    |
| <i>rseB</i> | anti-sigma factor for sigma E                                                 | -7.68       | 0.00    | -4.20       | 0.00    |
| <i>helD</i> | DNA helicase IV                                                               | -7.55       | 0.00    | -2.59       | 0.00    |
| <i>iclR</i> | IcLR (isocitrate lyase regulator) transcriptional repressor                   | -6.97       | 0.00    | -8.54       | 0.00    |
| <i>mlaF</i> | phospholipid ABC transporter, predicted ATP-binding component                 | -6.77       | 0.00    | -23.52      | 0.00    |
| <i>mlaA</i> | putative lipoprotein                                                          | -6.48       | 0.00    | -15.41      | 0.00    |
| <i>mntR</i> | component of MntR-Mn <sup>2+</sup> DNA-binding transcriptional dual regulator | -5.22       | 0.00    | -4.41       | 0.00    |
| <i>otsA</i> | trehalose-6-phosphate synthase                                                | -4.50       | 0.00    | -24.26      | 0.00    |
| <i>ppk</i>  | polyphosphate kinase                                                          | -4.39       | 0.00    | -5.85       | 0.00    |
| <i>pepA</i> | aminopeptidase A/I and DNA-binding transcriptional repressor                  | -4.35       | 0.00    | -3.18       | 0.01    |
| <i>fepC</i> | ferric enterobactin ABC transporter, ATP binding subunit                      | -4.30       | 0.00    | -3.49       | 0.00    |
| <i>mrcB</i> | penicillin-binding protein 1B                                                 | -4.14       | 0.00    | -4.82       | 0.00    |
| <i>cyoA</i> | cytochrome <i>bo</i> terminal oxidase subunit II                              | -4.09       | 0.00    | -24.55      | 0.00    |
| <i>ykkT</i> | predicted inner membrane protein                                              | -3.94       | 0.00    | -2.35       | 0.05    |
| <i>cpxA</i> | CpxA sensory histidine kinase                                                 | -3.93       | 0.00    | -4.08       | 0.00    |
| <i>uspE</i> | universal stress protein with a role in cellular motility                     | -3.88       | 0.00    | -4.68       | 0.00    |

|             |                                                                       |        |      |        |      |
|-------------|-----------------------------------------------------------------------|--------|------|--------|------|
| <i>rfaQ</i> | lipopolysaccharide core heptosyl transferase III                      | -3.76  | 0.00 | -1.87  | 0.01 |
| <i>dadA</i> | D-amino acid dehydrogenase                                            | -3.23  | 0.04 | -4.66  | 0.00 |
| <i>rnr</i>  | RNase R                                                               | -3.17  | 0.00 | -2.97  | 0.00 |
| <i>exbB</i> | TonB energy transducing system, ExbB subunit                          | -12.55 | 0.00 | -2.43  | 0.00 |
| <i>pgpA</i> | phosphatidylglycerophosphatase A                                      | -5.63  | 0.00 | -2.41  | 0.04 |
| <i>galF</i> | predicted uridylyltransferase subunit with GalU                       | -5.13  | 0.00 | -2.15  | 0.01 |
| <i>fepG</i> | ferric enterobactin ABC transporter, membrane subunit                 | -4.63  | 0.00 | -13.01 | 0.00 |
| <i>fepD</i> | ferric enterobactin ABC transporter, membrane subunit                 | -4.57  | 0.00 | -7.25  | 0.00 |
| <i>cyoC</i> | cytochrome <i>bo</i> terminal oxidase subunit III                     | -4.27  | 0.00 | -9.86  | 0.00 |
| <i>yibN</i> | predicted rhodanese-related sulfurtransferase                         | -4.17  | 0.00 | -1.70  | 0.04 |
| <i>cyaA</i> | adenylate cyclase                                                     | -3.96  | 0.00 | -2.15  | 0.03 |
| <i>ahpC</i> | alkyl hydroperoxide reductase, AhpC component                         | -3.89  | 0.01 | -4.69  | 0.00 |
| <i>phoQ</i> | PhoQ sensory histidine kinase                                         | -3.74  | 0.00 | -2.23  | 0.00 |
| <i>fbp</i>  | fructose-1,6-bisphosphatase I                                         | -3.53  | 0.00 | -1.58  | 0.02 |
| <i>tyrR</i> | TyrR DNA-binding transcriptional dual regulator                       | -3.35  | 0.03 | -7.39  | 0.00 |
| <i>rfal</i> | UDP-D-glucose:(glucosyl)LPS $\alpha$ -1,3-glucosyltransferase         | -3.33  | 0.00 | -1.57  | 0.01 |
| <i>yggS</i> | predicted enzyme                                                      | -3.04  | 0.00 | -1.81  | 0.03 |
| <i>envZ</i> | EnvZ sensory histidine kinase                                         | -2.75  | 0.00 | -3.31  | 0.00 |
| <i>bioB</i> | biotin synthase                                                       | -2.69  | 0.00 | -1.64  | 0.01 |
| <i>recG</i> | RecG DNA helicase                                                     | -2.56  | 0.00 | -1.95  | 0.01 |
| <i>hslU</i> | HslU hexamer component of HslVU protease                              | -2.44  | 0.00 | -3.78  | 0.00 |
| <i>phoP</i> | PhoP response regulator                                               | -2.42  | 0.00 | -2.63  | 0.00 |
| <i>dacA</i> | D-alanyl-D-alanine carboxypeptidase IA; penicillin-binding protein 5  | -2.28  | 0.00 | -1.76  | 0.04 |
| <i>uspA</i> | universal stress protein A                                            | -2.21  | 0.00 | -4.63  | 0.00 |
| <i>mlaC</i> | phospholipid ABC transporter, predicted periplasmic binding protein   | -2.20  | 0.04 | -5.18  | 0.00 |
| <i>ysgA</i> | predicted hydrolase                                                   | -2.20  | 0.00 | -1.73  | 0.01 |
| <i>oppB</i> | murein tripeptide /peptide ABC transporter, putative membrane subunit | -2.18  | 0.01 | -19.06 | 0.00 |
| <i>tgt</i>  | tRNA-guanine transglycosylase                                         | -2.09  | 0.04 | -2.44  | 0.00 |
| <i>zntA</i> | zinc, cadmium, and lead efflux system                                 | -2.08  | 0.00 | -6.35  | 0.00 |
| <i>mlaD</i> | phospholipid ABC transporter, predicted substrate binding protein     | -1.99  | 0.03 | -19.18 | 0.00 |
| <i>mlaE</i> | phospholipid ABC transporter, integral membrane component             | -1.91  | 0.00 | -4.23  | 0.00 |
| <i>maeB</i> | malate dehydrogenase                                                  | -1.74  | 0.02 | -1.54  | 0.03 |
| <i>dusA</i> | tRNA-dihydrouridine synthase A                                        | -1.73  | 0.01 | -1.74  | 0.00 |
| <i>typA</i> | protein possibly involved in ribosome structure or function           | -1.67  | 0.01 | -1.73  | 0.02 |
| <i>rapA</i> | RNA polymerase (RNAP)-binding ATPase and RNAP recycling factor        | -1.64  | 0.01 | -3.70  | 0.00 |
| <i>acs</i>  | acetyl-CoA synthetase (AMP-forming)                                   | -1.64  | 0.02 | -2.64  | 0.00 |
| <i>fabR</i> | FabR DNA-binding transcriptional repressor                            | -1.59  | 0.03 | -3.04  | 0.00 |

1 **Table S6.** Genes depleted in insertions only strain W and not in strain BL21(DE3) following selection  
 2 of Tn5 libraries in M9 + 0.5-0.6 M NaCl compared to selection in M9. Genes are only shown with  
 3 adjusted  $P < 0.05$  with the Benjamini Hochberg correction.

| locus <sup>1</sup> | gene | description                                                                         | fold-change | adj. P-value |
|--------------------|------|-------------------------------------------------------------------------------------|-------------|--------------|
| b4000              | hupA | transcriptional dual regulator HU- $\alpha$ (HU-2)                                  | -16.12      | 0.00         |
| b3459              | yhhK | maturation factor for PanD                                                          | -13.01      | 0.00         |
| b2912              | fau  | 5-formyltetrahydrofolate cyclo-ligase                                               | -12.32      | 0.00         |
| b1235              | rssB | regulator of RpoS                                                                   | -11.92      | 0.00         |
| b0080              | cra  | Cra DNA-binding transcriptional dual regulator                                      | -10.39      | 0.00         |
| b3205              | rapZ | RNase adaptor protein                                                               | -10.00      | 0.00         |
| b3650              | spoT | guanosine 3'-diphosphate 5'-triphosphate 3'-diphosphatase                           | -8.83       | 0.00         |
| b0839              | dacC | penicillin-binding protein 6                                                        | -8.69       | 0.00         |
| b0441              | ppiD | periplasmic folding helper protein                                                  | -8.24       | 0.00         |
| b2671              | ygaC | predicted protein                                                                   | -7.92       | 0.00         |
| b0688              | pgm  | phosphoglucomutase                                                                  | -7.62       | 0.00         |
| b0584              | fepA | ferric enterobactin/colicin B/colicin D outer membrane porin FepA                   | -7.40       | 0.00         |
| b3191              | mIaB | MlaB subunit of phospholipid ABC transporter                                        | -7.33       | 0.00         |
| b3641              | slmA | cell division inhibitor, nucleoid occlusion                                         | -7.20       | 0.00         |
| b1682              | sufC | SufC component of SufBCD Fe-S cluster scaffold complex                              | -7.19       | 0.00         |
| b0134              | panB | 3-methyl-2-oxobutanoate hydroxymethyltransferase                                    | -6.87       | 0.00         |
| b3212              | gltB | glutamate synthase, large subunit                                                   | -6.69       | 0.00         |
| b2897              | sdhE | FAD assembly factor                                                                 | -6.01       | 0.00         |
| b2697              | alaS | alanyl-tRNA synthetase and DNA-binding transcriptional repressor                    | -5.68       | 0.00         |
| b3842              | rfaH | RfaH transcriptional antiterminator                                                 | -5.66       | 0.00         |
| b3032              | cpdA | cAMP phosphodiesterase                                                              | -5.47       | 0.00         |
| b4401              | ptsG | glucose PTS permease - PtsG subunit                                                 | -5.46       | 0.00         |
| b1232              | purU | formyltetrahydrofolate deformylase                                                  | -5.18       | 0.00         |
| b3363              | ppiA | peptidyl-prolyl <i>cis-trans</i> isomerase A (rotamase A)                           | -5.11       | 0.00         |
| b1049              | opgH | membrane glycosyltransferase; synthesis of osmoregulated periplasmic glucans (OPGs) | -5.05       | 0.00         |
| b2822              | recC | RecC subunit of RecBCD helicase/nuclease (exonuclease V) complex                    | -4.67       | 0.00         |
| b0460              | hha  | haemolysin expression modulating protein                                            | -4.42       | 0.00         |
| b2837              | galR | GalR DNA-binding transcriptional dual regulator                                     | -4.40       | 0.00         |
| b4217              | ytfK | conserved protein                                                                   | -4.34       | 0.00         |
| b2494              | bepA | chaperone/protease involved in the                                                  | -4.32       | 0.00         |

|           |           |                                                                                 |       |      |
|-----------|-----------|---------------------------------------------------------------------------------|-------|------|
|           |           | maintenance of OM integrity                                                     |       |      |
| b0390     | aroM      | conserved protein                                                               | -4.30 | 0.00 |
| b3940     | metL      | aspartate kinase / homoserine dehydrogenase                                     | -4.30 | 0.00 |
| b1784     | yeaH      | conserved protein                                                               | -4.27 | 0.00 |
| b3349     | slyD      | FKBP-type peptidyl prolyl <i>cis-trans</i> isomerase                            | -4.16 | 0.01 |
| b2215     | ompC      | outer membrane porin C                                                          | -4.03 | 0.00 |
| b3688     | yidQ      | conserved outer membrane protein                                                | -3.91 | 0.00 |
| b1090     | plsX      | fatty acid/phospholipid synthesis protein                                       | -3.89 | 0.01 |
| ECW_m1499 | ECW_m1499 | hypothetical protein                                                            | -3.73 | 0.01 |
| b3849     | trkH      | K <sup>+</sup> transporter TrkH                                                 | -3.71 | 0.00 |
| ECW_m0342 | lafE      | flagellar hook-length control protein                                           | -3.61 | 0.00 |
| b2502     | ppx       | exopolyphosphatase                                                              | -3.57 | 0.00 |
| b3252     | csrD      | regulator of CsrB and CsrC decay                                                | -3.49 | 0.00 |
| b3213     | gltD      | glutamate synthase, small subunit                                               | -3.45 | 0.00 |
| b4046     | zur       | DNA-binding transcriptional repressor, Zn(II)-binding protein                   | -3.44 | 0.00 |
| b1859     | znuB      | Zn <sup>2+</sup> ABC transporter - membrane subunit                             | -3.39 | 0.03 |
| b1706     | ydiU      | conserved protein                                                               | -3.33 | 0.00 |
| b2436     | hemF      | coproporphyrinogen III oxidase                                                  | -3.30 | 0.00 |
| b1286     | rnb       | ribonuclease III                                                                | -3.27 | 0.00 |
| b0425     | panE      | 2-dehydropantoate 2-reductase                                                   | -3.27 | 0.00 |
| b3350     | kefB      | potassium:proton antiporter                                                     | -3.23 | 0.00 |
| b1188     | ycgB      | conserved protein                                                               | -3.15 | 0.00 |
| b1598     | ydgD      | predicted peptidase                                                             | -3.15 | 0.00 |
| b0767     | pgl       | 6-phosphogluconolactonase                                                       | -3.14 | 0.00 |
| b1711     | btuC      | vitamin B12 ABC transporter - membrane subunit                                  | -3.13 | 0.03 |
| b0463     | acrA      | membrane fusion protein subunit of AcrAD-TolC multidrug efflux transport system | -3.06 | 0.00 |
| b1641     | slyB      | outer membrane lipoprotein                                                      | -3.05 | 0.00 |
| b3336     | bfr       | bacterioferritin monomer                                                        | -2.97 | 0.00 |
| b4402     | yjjY      | predicted protein                                                               | -2.95 | 0.03 |
| b3232     | yhcM      | conserved protein with a nucleoside triphosphate hydrolase domain               | -2.93 | 0.00 |
| b0102     | zapD      | cell division factor ZapD                                                       | -2.89 | 0.00 |
| b3055     | ygiM      | predicted signal transduction protein (SH3 domain)                              | -2.86 | 0.00 |
| b4035     | malK      | maltose ABC transporter - ATP binding subunit                                   | -2.84 | 0.00 |
| b0581     | ybdK      | carboxylate-amine ligase                                                        | -2.82 | 0.00 |
| b3168     | infB      | protein chain initiation factor IF2                                             | -2.80 | 0.04 |
| b0240     | crI       | RNA polymerase holoenzyme assembly factor CrI                                   | -2.76 | 0.00 |

|           |      |                                                                              |       |      |
|-----------|------|------------------------------------------------------------------------------|-------|------|
| b3351     | kefG | protein required for KefB activity                                           | -2.65 | 0.00 |
| b0426     | yajQ | nucleotide binding protein                                                   | -2.60 | 0.00 |
| b0214     | lon  | DNA-binding, ATP-dependent protease La                                       | -2.51 | 0.04 |
| b2808     | gcvA | GcvA DNA-binding transcriptional dual regulator                              | -2.47 | 0.01 |
| b3813     | rpoB | RNA polymerase, $\beta$ subunit                                              | -2.45 | 0.03 |
| b4242     | mgtA | Mg <sup>2+</sup> /Ni <sup>2+</sup> transporting ATPase                       | -2.42 | 0.00 |
| b2895     | fldB | flavodoxin 2                                                                 | -2.42 | 0.03 |
| b0832     | gsiD | glutathione ABC transporter - membrane subunit                               | -2.40 | 0.00 |
| b0440     | hupB | transcriptional dual regulator HU- $\beta$ , NS1 (HU-1)                      | -2.40 | 0.00 |
| b0857     | potI | putrescine ABC transporter - membrane subunit                                | -2.39 | 0.00 |
| b1683     | sufB | SufB component of SufBCD Fe-S cluster scaffold complex                       | -2.38 | 0.02 |
| b3031     | yqiA | esterase                                                                     | -2.38 | 0.00 |
| b3779     | gpp  | guanosine 5'-triphosphate, 3'-diphosphate pyrophosphatase                    | -2.36 | 0.00 |
| b0840     | deoR | DeoR DNA-binding transcriptional repressor                                   | -2.35 | 0.00 |
| b2749     | ygbE | conserved inner membrane protein                                             | -2.34 | 0.00 |
| b4258     | valS | valyl-tRNA synthetase                                                        | -2.34 | 0.03 |
| b0829     | gsiA | glutathione ABC transporter - ATP binding subunit                            | -2.33 | 0.00 |
| b0026     | ileS | isoleucyl-tRNA synthetase                                                    | -2.31 | 0.01 |
| b2470     | acrD | permease subunit of AcrAD-TolC multidrug efflux transport system             | -2.31 | 0.02 |
| b1783     | yeaG | protein kinase                                                               | -2.31 | 0.02 |
| b4679     | yohP | small membrane protein                                                       | -2.31 | 0.03 |
| b0831     | gsiC | glutathione ABC transporter - membrane subunit                               | -2.29 | 0.01 |
| b2790     | yqcA | predicted flavoprotein                                                       | -2.22 | 0.01 |
| b0427     | yajR | YajR MFS transporter                                                         | -2.22 | 0.00 |
| b3625     | rfaY | lipopolysaccharide core heptose (II) kinase                                  | -2.21 | 0.00 |
| b1816     | yoaE | predicted inner membrane protein                                             | -2.17 | 0.04 |
| b2029     | gnd  | 6-phosphogluconate dehydrogenase (decarboxylating)                           | -2.17 | 0.00 |
| b1113     | ycfS | L,D-transpeptidase                                                           | -2.14 | 0.01 |
| b2464     | talA | transaldolase A                                                              | -2.11 | 0.01 |
| b2587     | kgtP | $\alpha$ -ketoglutarate:H <sup>+</sup> symporter                             | -2.11 | 0.00 |
| b1819     | manZ | mannose PTS permease - ManZ subunit                                          | -2.09 | 0.01 |
| b2829     | ptsP | phosphoenolpyruvate-protein phosphotransferase PtsP, enzyme I <sup>Ntr</sup> | -2.02 | 0.01 |
| b1976     | mtfA | Mlc titration factor                                                         | -1.99 | 0.01 |
| ECW_m0335 | lfgL | flagellar hook-filament junction protein                                     | -1.97 | 0.01 |
| b1943     | fliK | flagellar hook-length control protein                                        | -1.92 | 0.03 |

|           |           |                                                                   |       |      |
|-----------|-----------|-------------------------------------------------------------------|-------|------|
| b0434     | yajG      | predicted lipoprotein                                             | -1.91 | 0.03 |
| b1560     | ydfU      | Qin prophage; predicted protein                                   | -1.88 | 0.04 |
| b2592     | clpB      | ClpB chaperone                                                    | -1.86 | 0.01 |
| b0393     | rdgC      | nucleoid-associated protein RdgC                                  | -1.84 | 0.04 |
| b4504     | ykfH      | predicted protein                                                 | -1.84 | 0.00 |
| b2465     | tktB      | transketolase II                                                  | -1.83 | 0.03 |
| b1492     | gadC      | glutamic acid:4-aminobutyrate antiporter                          | -1.82 | 0.01 |
| b4207     | fkIB      | FKBP-type peptidyl prolyl cis-trans isomerase (rotamase)          | -1.79 | 0.00 |
| b0820     | ybiT      | putative ATP-binding component of a transport system              | -1.79 | 0.02 |
| b1190     | dadX      | alanine racemase 2, PLP-binding                                   | -1.78 | 0.04 |
| b0800     | ybiB      | predicted transferase/phosphorylase                               | -1.77 | 0.04 |
| b1817     | manX      | mannose PTS permease - ManX subunit                               | -1.76 | 0.03 |
| ECW_m0922 | ECW_m0922 | terminase, ATPase subunit                                         | -1.76 | 0.01 |
| b1604     | ydgH      | predicted protein                                                 | -1.75 | 0.05 |
| b1075     | flgD      | flagellar biosynthesis, initiation of hook assembly               | -1.71 | 0.01 |
| b0212     | gloB      | glyoxalase II                                                     | -1.71 | 0.03 |
| b0493     | ybbO      | predicted oxidoreductase with NAD(P)-binding Rossmann-fold domain | -1.69 | 0.04 |
| b3810     | yigA      | conserved protein                                                 | -1.69 | 0.03 |
| b3740     | rsmG      | 16S rRNA m <sup>7</sup> G527 methyltransferase                    | -1.66 | 0.00 |
| b4180     | rlmB      | 23S rRNA 2'-O-ribose G2251 methyltransferase monomer              | -1.65 | 0.03 |
| b2014     | plaP      | putrescine:H <sup>+</sup> symporter                               | -1.65 | 0.03 |
| ECW_m3904 | waaT      | UDP-galactose:(glucosyl) LPS α1,2-galactosyltransferase           | -1.62 | 0.00 |
| b2106     | rcnA      | membrane protein conferring nickel and cobalt resistance          | -1.61 | 0.04 |
| b2736     | ygbJ      | predicted dehydrogenase, with NAD(P)-binding Rossmann-fold domain | -1.59 | 0.01 |
| b2835     | lplT      | lysophospholipid transporter                                      | -1.57 | 0.03 |
| ECW_m1506 | ECW_m1506 | side tail fiber protein                                           | -1.56 | 0.02 |
| b2257     | arnT      | 4-amino-4-deoxy-L-arabinose (L-Ara4N) transferase                 | -1.56 | 0.04 |
| b1660     | ydhC      | predicted transport protein                                       | -1.55 | 0.02 |
| b3755     | yieP      | predicted transcriptional regulator                               | -1.53 | 0.04 |
| b0598     | cstA      | peptide transporter induced by carbon starvation                  | -1.49 | 0.04 |
| b4389     | radA      | DNA recombination protein                                         | -1.47 | 0.04 |

<sup>1</sup> locus tags are for the corresponding genes in K-12 MG1655, except when the gene does not exist in K-12 MG1655. The W locus tag is used in these cases.

1 **Table S7.** Genes depleted in insertions only strain BL21(DE3) and not in strain W following selection  
2 of Tn5 libraries in M9 + 0.5-0.6 M NaCl compared to selection in M9. Genes are only shown with  
3 adjusted  $P < 0.05$  with the Benjamini Hochberg correction.

| locus <sup>1</sup> | gene | description                                                         | fold-change | adj P-value |
|--------------------|------|---------------------------------------------------------------------|-------------|-------------|
| b1748              | astC | succinylornithine transaminase, PLP-dependent                       | -26.73      | 0.00        |
| b0728              | sucC | succinyl-CoA synthetase subunit beta                                | -25.44      | 0.00        |
| b1243              | oppA | oligopeptide transporter subunit                                    | -19.41      | 0.00        |
| b3437              | gntK | gluconate kinase                                                    | -18.54      | 0.00        |
| b3438              | gntR | DNA-binding transcriptional repressor                               | -15.24      | 0.00        |
| b1823              | cspC | stress protein, member of the CspA-family                           | -12.51      | 0.00        |
| b1744              | astE | succinylglutamate desuccinylase                                     | -10.53      | 0.00        |
| b2168              | fruK | 1-phosphofructokinase                                               | -10.04      | 0.00        |
| b1423              | ydcJ | hypothetical protein                                                | -9.17       | 0.00        |
| b1246              | oppD | oligopeptide ABC transporter ATP-binding protein                    | -8.73       | 0.00        |
| b0428              | cyoE | protoheme IX farnesyltransferase                                    | -8.72       | 0.00        |
| b3790              | rffC | TDP-fucosamine acetyltransferase                                    | -8.39       | 0.00        |
| b1746              | astD | succinylglutamic semialdehyde dehydrogenase                         | -8.36       | 0.00        |
| b4175              | hflC | modulator for HflB protease specific for phage lambda cII repressor | -8.23       | 0.00        |
| b0221              | fadE | acyl-CoA dehydrogenase                                              | -8.03       | 0.00        |
| b3423              | glpR | DNA-binding transcriptional repressor                               | -7.65       | 0.00        |
| b4395              | ytjC | phosphoglycerate mutase                                             | -7.43       | 0.00        |
| b0526              | cysS | cysteinyl-tRNA synthetase                                           | -7.23       | 0.00        |
| b2425              | cysP | thiosulfate transporter subunit                                     | -7.20       | 0.00        |
| ECD_04231          | hpaR | Homoprotocatechuate degradative operon repressor                    | -7.10       | 0.00        |
| b1856              | yebA | peptidase                                                           | -6.92       | 0.00        |
| b4205              | ytfA | transcriptional regulator                                           | -6.53       | 0.00        |
| b1205              | yehH | inner membrane protein                                              | -6.42       | 0.00        |
| b1745              | astB | succinylarginine dihydrolase                                        | -6.07       | 0.00        |
| b1824              | yobF | hypothetical protein                                                | -6.02       | 0.00        |
| b3724              | phoU | negative regulator of PhoR/PhoB two-component regulator             | -5.98       | 0.00        |
| b3228              | sspB | ClpXP protease specificity-enhancing factor                         | -5.83       | 0.00        |
| b1747              | astA | arginine succinyltransferase                                        | -5.67       | 0.00        |
| b2684              | mprA | DNA-binding transcriptional repressor                               | -5.61       | 0.00        |
| b2114              | metG | methionyl-tRNA synthetase                                           | -5.59       | 0.00        |
| b2700              | ygaD | competence damage-inducible protein A                               | -5.42       | 0.00        |
| b0585              | fes  | enterobactin/ferric enterobactin esterase                           | -5.42       | 0.00        |



|       |      |                                                                                                                   |       |      |
|-------|------|-------------------------------------------------------------------------------------------------------------------|-------|------|
| b1105 | lpoB | outer membrane lipoprotein                                                                                        | -5.42 | 0.00 |
| b1103 | hinT | purine nucleoside phosphoramidase                                                                                 | -5.28 | 0.00 |
| b3791 | rffA | TDP-4-oxo-6-deoxy-D-glucose transaminase                                                                          | -5.23 | 0.00 |
| b3494 | uspB | universal stress protein UspB                                                                                     | -5.22 | 0.00 |
| b1014 | putA | multifunctional DNA-binding transcriptional regulator/proline dehydrogenase/pyrroline-5-carboxylate dehydrogenase | -5.14 | 0.00 |
| b2688 | gshA | glutamate-cysteine ligase                                                                                         | -4.99 | 0.00 |
| b0755 | gpmA | phosphoglyceromutase                                                                                              | -4.96 | 0.00 |
| b3464 | ftsY | fused Signal Recognition Particle (SRP) receptor: membrane binding protein/hypothetical protein                   | -4.79 | 0.02 |
| b0049 | apaH | diadenosine tetraphosphatase                                                                                      | -4.75 | 0.00 |
| b3860 | dsbA | protein disulfide isomerase I                                                                                     | -4.60 | 0.00 |
| b1252 | tonB | membrane spanning protein in TonB-ExbB-ExbD complex                                                               | -4.57 | 0.00 |
| b3984 | rplA | 50S ribosomal protein L1                                                                                          | -4.50 | 0.03 |
| b0734 | cydB | cytochrome d terminal oxidase, subunit II                                                                         | -4.48 | 0.01 |
| b0729 | sucD | succinyl-CoA synthetase subunit alpha                                                                             | -4.45 | 0.00 |
| b4174 | hflK | modulator for HflB protease specific for phage lambda cII repressor                                               | -4.39 | 0.00 |
| b2283 | nuoG | NADH dehydrogenase subunit G                                                                                      | -4.36 | 0.00 |
| b3203 | hpf  | ribosome-associated, sigma 54 modulation protein                                                                  | -4.30 | 0.00 |
| b1284 | yciT | DNA-binding transcriptional regulator                                                                             | -4.28 | 0.00 |
| b2412 | zipA | cell division protein ZipA                                                                                        | -4.20 | 0.05 |
| b1095 | fabF | 3-oxoacyl-(acyl carrier protein) synthase                                                                         | -4.19 | 0.01 |
| b1249 | cls  | cardiolipin synthetase                                                                                            | -4.15 | 0.00 |
| b1854 | pykA | pyruvate kinase                                                                                                   | -4.12 | 0.00 |
| b3178 | ftsH | protease, ATP-dependent zinc-metalloprotease                                                                      | -4.07 | 0.00 |
| b0846 | ybjK | DNA-binding transcriptional regulator                                                                             | -3.98 | 0.00 |
| b2947 | gshB | glutathione synthetase                                                                                            | -3.98 | 0.00 |
| b0436 | tig  | trigger factor                                                                                                    | -3.98 | 0.00 |
| b0636 | rlmH | hypothetical protein                                                                                              | -3.96 | 0.02 |
| b1438 | hicB | DNA-binding transcriptional regulator                                                                             | -3.93 | 0.00 |
| b2742 | nlpD | outer membrane lipoprotein                                                                                        | -3.87 | 0.00 |
| b0431 | cyoB | cytochrome o ubiquinol oxidase subunit I                                                                          | -3.85 | 0.00 |
| b1136 | icd  | isocitrate dehydrogenase                                                                                          | -3.82 | 0.02 |
| b2308 | hisQ | histidine/lysine/arginine/ornithine transporter subunit                                                           | -3.81 | 0.00 |
| b3932 | hslV | ATP-dependent protease peptidase subunit                                                                          | -3.77 | 0.00 |
| b2299 | yfcD | NUDIX hydrolase                                                                                                   | -3.68 | 0.00 |
| b1276 | acnA | aconitate hydratase                                                                                               | -3.67 | 0.00 |
| b1968 | yedV | sensory kinase in two-component regulatory                                                                        | -3.66 | 0.00 |

|           |           |                                                                 |       |      |
|-----------|-----------|-----------------------------------------------------------------|-------|------|
|           |           | system with YedW                                                |       |      |
| b0369     | hemB      | delta-aminolevulinic acid dehydratase                           | -3.64 | 0.02 |
| b4020     | yjbB      | transporter                                                     | -3.60 | 0.00 |
| b1630     | rsxD      | electron transport complex protein RnfD                         | -3.58 | 0.00 |
| b1761     | gdhA      | glutamate dehydrogenase                                         | -3.56 | 0.00 |
| b1857     | znuA      | high-affinity zinc transporter periplasmic protein              | -3.54 | 0.00 |
| b1087     | yceF      | Maf-like protein                                                | -3.53 | 0.00 |
| b4244     | pyrI      | aspartate carbamoyltransferase regulatory subunit               | -3.53 | 0.00 |
| b4191     | ulaR      | DNA-binding transcriptional dual regulator                      | -3.48 | 0.00 |
| b1830     | prc       | carboxy-terminal protease for penicillin-binding protein 3      | -3.48 | 0.00 |
| b2306     | hisP      | histidine/lysine/arginine/ornithine transporter subunit         | -3.47 | 0.00 |
| b0177     | bamA      | hypothetical protein                                            | -3.45 | 0.05 |
| b1627     | rsxA      | Na(+)-translocating NADH-quinone reductase subunit E            | -3.41 | 0.01 |
| b3162     | deaD      | ATP-dependent RNA helicase                                      | -3.36 | 0.00 |
| b3792     | wzxE      | O-antigen translocase                                           | -3.35 | 0.00 |
| b0676     | nagC      | DNA-binding transcriptional dual regulator                      | -3.34 | 0.00 |
| b2307     | hisM      | histidine/lysine/arginine/ornithine transporter subunit         | -3.33 | 0.00 |
| b4173     | hflX      | GTPase                                                          | -3.33 | 0.00 |
| b3304     | rplR      | 50S ribosomal protein L18                                       | -3.29 | 0.00 |
| b1092     | fabD      | acyl carrier protein S-malonyltransferase                       | -3.23 | 0.01 |
| b2553     | glnB      | regulatory protein P-II for glutaminesynthetase                 | -3.23 | 0.01 |
| b3574     | yiaJ      | DNA-binding transcriptional repressor                           | -3.22 | 0.00 |
| b2504     | yfgG      | hypothetical protein                                            | -3.18 | 0.01 |
| ECD_01690 | ECD_01690 | hypothetical protein                                            | -3.17 | 0.00 |
| b2309     | hisJ      | histidine/lysine/arginine/ornithine transporter subunit         | -3.15 | 0.00 |
| b4484     | cpxP      | periplasmic protein combats stress                              | -3.11 | 0.00 |
| b3784     | rfe       | UDP-GlcNAc:undecaprenylphosphate GlcNAc-1-phosphate transferase | -3.08 | 0.00 |
| b1097     | yceG      | aminodeoxychorismate lyase                                      | -3.06 | 0.01 |
| ECD_10023 | cII       | antitermination protein                                         | -3.00 | 0.00 |
| b1594     | dgsA      | DNA-binding transcriptional repressor                           | -2.98 | 0.02 |
| b1713     | pheT      | phenylalanyl-tRNA synthetase subunit beta                       | -2.96 | 0.03 |
| b2817     | amiC      | N-acetylmuramoyl-L-alanine amidase                              | -2.94 | 0.00 |
| b3783     | uvrD      | DNA-dependent ATPase I and helicase II                          | -2.93 | 0.01 |
| b3780     | rhIB      | ATP-dependent RNA helicase                                      | -2.88 | 0.00 |
| b3794     | rffM      | UDP-N-acetyl-D-mannosaminuronic acid transferase                | -2.86 | 0.00 |

|       |      |                                                                                                                                                            |       |      |
|-------|------|------------------------------------------------------------------------------------------------------------------------------------------------------------|-------|------|
| b3247 | rng  | ribonuclease G                                                                                                                                             | -2.85 | 0.01 |
| b0020 | nhaR | DNA-binding transcriptional activator                                                                                                                      | -2.82 | 0.00 |
| b1596 | ynfM | transporter                                                                                                                                                | -2.80 | 0.00 |
| b0113 | pdhR | pyruvate dehydrogenase complex<br>transcriptional regulator                                                                                                | -2.77 | 0.05 |
| b3787 | rffD | UDP-N-acetyl-D-mannosaminuronic acid<br>dehydrogenase                                                                                                      | -2.76 | 0.00 |
| b0464 | acrR | DNA-binding transcriptional repressor                                                                                                                      | -2.75 | 0.00 |
| b3260 | dusB | tRNA-dihydrouridine synthase B                                                                                                                             | -2.67 | 0.01 |
| b4210 | ytfF | inner membrane protein                                                                                                                                     | -2.65 | 0.00 |
| b2751 | cysN | sulfate adenylyltransferase subunit 1                                                                                                                      | -2.64 | 0.01 |
| b1488 | ddpX | D-Ala-D-Ala dipeptidase                                                                                                                                    | -2.63 | 0.01 |
| b3500 | gor  | glutathione reductase                                                                                                                                      | -2.62 | 0.00 |
| b3846 | fadB | bifunctional 3-hydroxybutyryl-CoA<br>epimerase/delta(3)-cis-delta(2)-trans-enoyl-CoA<br>isomerase/enoyl-CoA hydratase/ 3-hydroxyacyl-<br>CoA dehydrogenase | -2.59 | 0.00 |
| b3465 | rsmD | methyltransferase                                                                                                                                          | -2.58 | 0.02 |
| b3655 | yicH | hypothetical protein                                                                                                                                       | -2.55 | 0.00 |
| b4383 | deoB | phosphopentomutase                                                                                                                                         | -2.55 | 0.00 |
| b3786 | rffE | UDP-N-acetyl glucosamine-2-epimerase                                                                                                                       | -2.54 | 0.00 |
| b1255 | yicC | hypothetical protein                                                                                                                                       | -2.50 | 0.02 |
| b4251 | yjgJ | transcriptional regulator                                                                                                                                  | -2.48 | 0.00 |
| b3643 | rph  | ribonuclease PH                                                                                                                                            | -2.48 | 0.00 |
| b3912 | cpxR | DNA-binding response regulator in two-<br>component regulatory system with CpxA                                                                            | -2.48 | 0.00 |
| b2344 | fadL | long-chain fatty acid outer membrane<br>transporter                                                                                                        | -2.46 | 0.00 |
| b2007 | yeeX | hypothetical protein                                                                                                                                       | -2.44 | 0.00 |
| b2287 | nuoB | NADH dehydrogenase subunit B                                                                                                                               | -2.44 | 0.02 |
| b2418 | pdxK | pyridoxine kinase                                                                                                                                          | -2.42 | 0.00 |
| b3956 | ppc  | phosphoenolpyruvate carboxylase                                                                                                                            | -2.42 | 0.03 |
| b1164 | ycgZ | hypothetical protein                                                                                                                                       | -2.39 | 0.04 |
| b3888 | yiiD | acetyltransferase                                                                                                                                          | -2.37 | 0.00 |
| b2516 | rodZ | hypothetical protein                                                                                                                                       | -2.36 | 0.00 |
| b3053 | glnE | bifunctional<br>deadenylyltransferase/adenylyltransferase                                                                                                  | -2.35 | 0.00 |
| b4208 | cycA | D-alanine/D-serine/glycine transporter                                                                                                                     | -2.31 | 0.00 |
| b2289 | lrhA | DNA-binding transcriptional repressor of<br>flagellar, motility and chemotaxis genes                                                                       | -2.29 | 0.00 |
| b1132 | hflD | hypothetical protein                                                                                                                                       | -2.23 | 0.04 |
| b2310 | argT | lysine/arginine/ornithine transporter subunit                                                                                                              | -2.22 | 0.00 |
| b1687 | ydiJ | FAD-linked oxidoreductase                                                                                                                                  | -2.17 | 0.03 |

|           |           |                                                                          |       |      |
|-----------|-----------|--------------------------------------------------------------------------|-------|------|
| b1381     | ydbH      | hypothetical protein                                                     | -2.12 | 0.00 |
| b1123     | potD      | spermidine/putrescine ABC transporter substrate-binding protein          | -2.07 | 0.00 |
| b1704     | aroH      | 3-deoxy-D-arabinoheptulosonate-7-phosphatesynthase                       | -2.06 | 0.00 |
| b1805     | fadD      | acyl-CoA synthase                                                        | -2.04 | 0.00 |
| b3005     | exbD      | membrane spanning protein in TonB-ExbB-ExbD complex                      | -2.02 | 0.00 |
| b0197     | metQ      | DL-methionine transporter subunit                                        | -2.02 | 0.01 |
| b3816     | corA      | magnesium/nickel/cobalt transporter                                      | -2.01 | 0.02 |
| b1114     | mfd       | transcription-repair coupling factor                                     | -1.98 | 0.00 |
| b1499     | ydeO      | DNA-binding transcriptional activator                                    | -1.96 | 0.02 |
| ECD_01416 | yhhI_3    | hypothetical protein                                                     | -1.95 | 0.05 |
| ECD_00840 | ECD_00840 | hypothetical protein                                                     | -1.94 | 0.02 |
| b1767     | ansA      | asparaginase                                                             | -1.92 | 0.00 |
| b1180     | ycgM      | isomerase/hydrolase                                                      | -1.91 | 0.02 |
| b3847     | pepQ      | proline dipeptidase                                                      | -1.91 | 0.00 |
| b2295     | yfbV      | hypothetical protein                                                     | -1.90 | 0.04 |
| b3673     | emrD      | multidrug efflux system protein                                          | -1.90 | 0.00 |
| b0469     | apt       | adenine phosphoribosyltransferase                                        | -1.89 | 0.00 |
| b3054     | ygiF      | adenylate cyclase                                                        | -1.85 | 0.00 |
| b3146     | rsml      | methyltransferase                                                        | -1.83 | 0.00 |
| b2144     | sanA      | hypothetical protein                                                     | -1.83 | 0.01 |
| b3908     | sodA      | superoxide dismutase                                                     | -1.79 | 0.00 |
| b3529     | yhjK      | diguanylate cyclase                                                      | -1.79 | 0.00 |
| b3026     | qseC      | sensory histidine kinase in two-component regulatory system with QseB    | -1.78 | 0.00 |
| b1725     | yniA      | phosphotransferase/kinase                                                | -1.77 | 0.04 |
| b3920     | yiiQ      | hypothetical protein                                                     | -1.76 | 0.01 |
| b1422     | ydcl      | DNA-binding transcriptional regulator                                    | -1.75 | 0.04 |
| b0752     | zitB      | zinc transporter ZitB                                                    | -1.73 | 0.03 |
| b2055     | wcaE      | glycosyl transferase family protein                                      | -1.72 | 0.01 |
| b3653     | gltS      | glutamate transporter                                                    | -1.72 | 0.01 |
| b1040     | csgD      | DNA-binding transcriptional activator in two-component regulatory system | -1.71 | 0.01 |
| b0473     | htpG      | heat shock protein 90                                                    | -1.70 | 0.00 |
| b4292     | fecR      | transmembrane signal transducer for ferric citrate transport             | -1.69 | 0.05 |
| b0861     | artM      | arginine transporter subunit                                             | -1.69 | 0.01 |
| b3616     | tdh       | L-threonine 3-dehydrogenase                                              | -1.68 | 0.02 |
| b1576     | ydfD      | hypothetical protein                                                     | -1.68 | 0.02 |
| b4391     | yjjK      | sugar ABC transporter ATP-binding protein                                | -1.67 | 0.03 |
| b3591     | selA      | selenocysteine synthase                                                  | -1.67 | 0.03 |

|           |           |                                                                             |       |      |
|-----------|-----------|-----------------------------------------------------------------------------|-------|------|
| b3473     | yhhS      | transporter                                                                 | -1.67 | 0.04 |
| b3347     | fkpA      | FKBP-type peptidyl-prolyl cis-trans isomerase                               | -1.67 | 0.00 |
| b3961     | oxyR      | DNA-binding transcriptional dual regulator                                  | -1.67 | 0.03 |
| b1365     | ynaK      | hypothetical protein                                                        | -1.63 | 0.00 |
| b0461     | tomB      | hypothetical protein                                                        | -1.63 | 0.01 |
| b3541     | dppD      | dipeptide transporter                                                       | -1.62 | 0.00 |
| b1782     | mipA      | scaffolding protein for murein synthesizing machinery                       | -1.62 | 0.01 |
| b3617     | kbl       | 2-amino-3-ketobutyrate coenzyme A ligase                                    | -1.62 | 0.02 |
| b2659     | csiD      | hypothetical protein                                                        | -1.61 | 0.01 |
| b2163     | yeiL      | DNA-binding transcriptional activator                                       | -1.59 | 0.01 |
| b3253     | yhdH      | oxidoreductase, Zn-dependent and NAD(P)-binding                             | -1.59 | 0.04 |
| b1535     | ydeH      | hypothetical protein                                                        | -1.59 | 0.00 |
| ECD_02649 | ECD_02649 | L-ribulokinase AraB-like protein                                            | -1.58 | 0.02 |
| b1691     | ydiN      | transporter                                                                 | -1.56 | 0.00 |
| b1250     | kch       | voltage-gated potassium channel                                             | -1.55 | 0.01 |
| b2584     | yfiQ      | acyl-CoA synthetase NAD(P)-binding subunit/ATP-binding subunit              | -1.55 | 0.03 |
| b3354     | yheU      | hypothetical protein                                                        | -1.55 | 0.02 |
| ECD_02511 | ECD_02511 | ParB family protein                                                         | -1.54 | 0.04 |
| b3789     | rffH      | glucose-1-phosphate thymidyltransferase                                     | -1.54 | 0.02 |
| b2369     | evgA      | DNA-binding response regulator in two-component regulatory system with EvgS | -1.53 | 0.04 |
| ECD_03522 | ssb_2     | ssDNA-binding protein                                                       | -1.53 | 0.03 |
| ECD_01506 | ECD_01506 | hypothetical protein                                                        | -1.52 | 0.04 |
| b1694     | ydiF      | acetyl-CoA:acetoacetyl-CoA transferase alpha and beta subunits              | -1.51 | 0.02 |
| b0449     | mdlB      | multidrug ABC transporter ATP-binding protein                               | -1.47 | 0.03 |
| b2372     | yfdV      | transporter                                                                 | -1.41 | 0.04 |

<sup>1</sup>locus tags are for the corresponding genes in K-12 MG1655, except when the gene does not exist in K-12 MG1655. The BL21(DE3) locus tag is used in these cases.

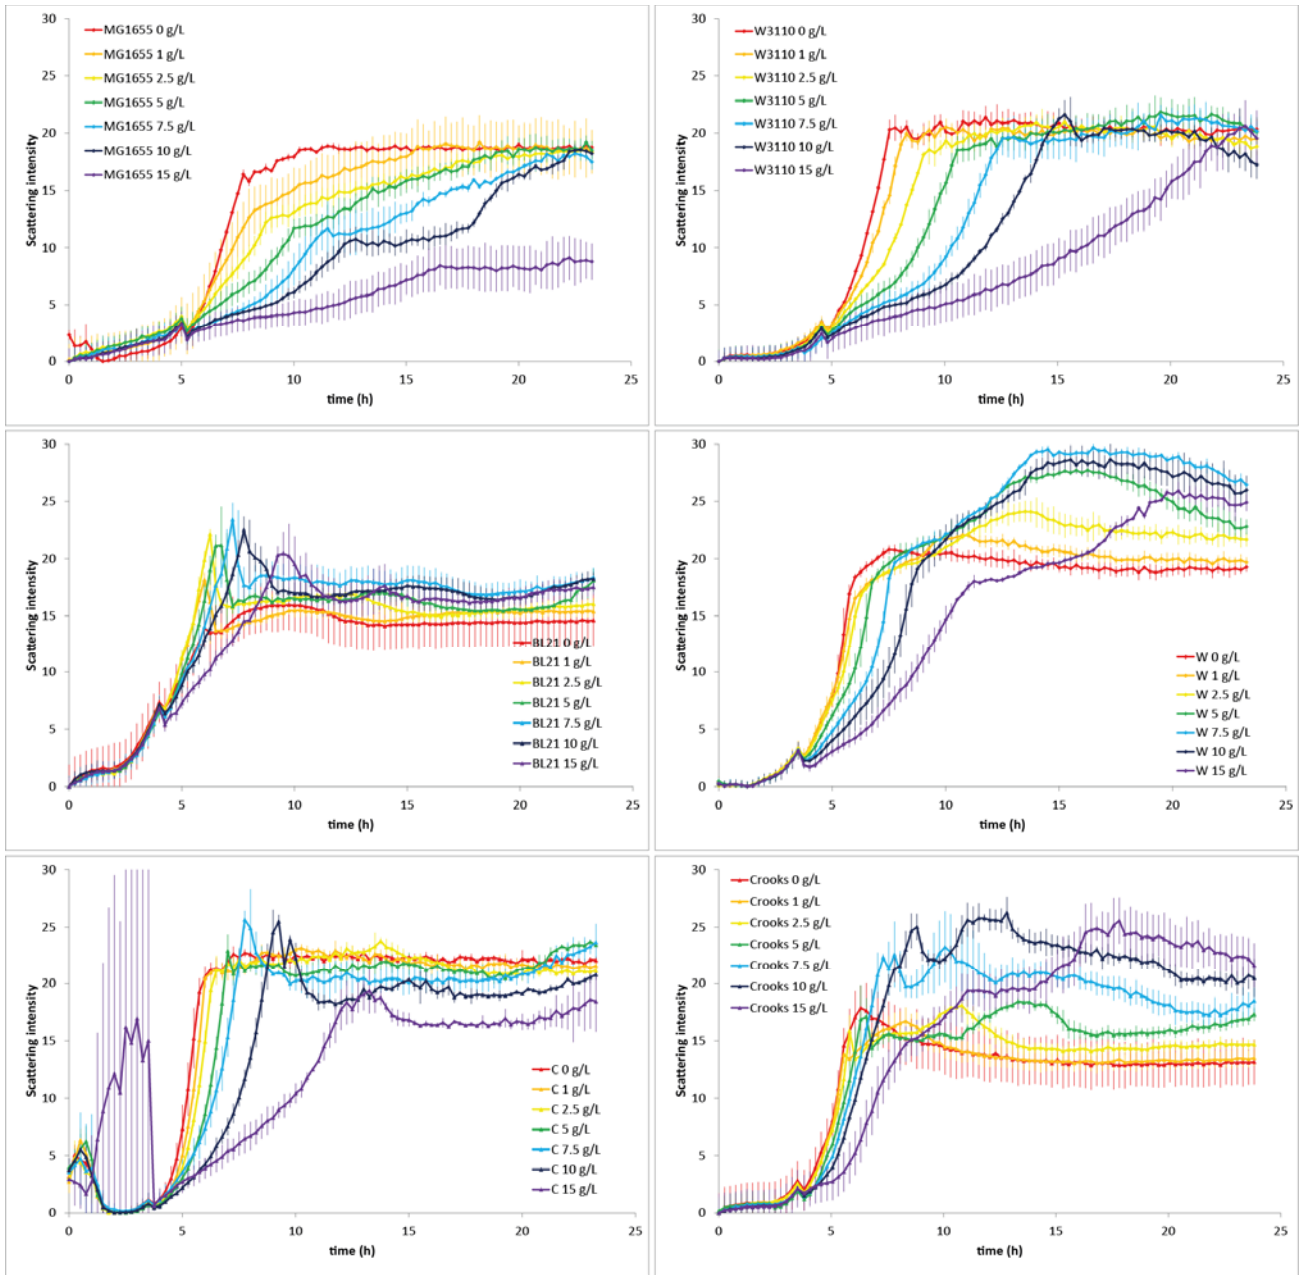

1  
2

3 **Fig. S1.** Growth curves for K-12 MG1655 (top left), K-12 W3110 (top right), BL21(DE3) (middle  
4 left), W (middle right), C (bottom left), and Crooks (bottom left) grown with a concentration series of  
5 sodium acetate between 0 and 15 g/L. Sodium acetate was added during exponential growth (5 h for  
6 MG1655 and W3110; 4 h for BL21(DE3); 3.5 h for W, C, and Crooks).

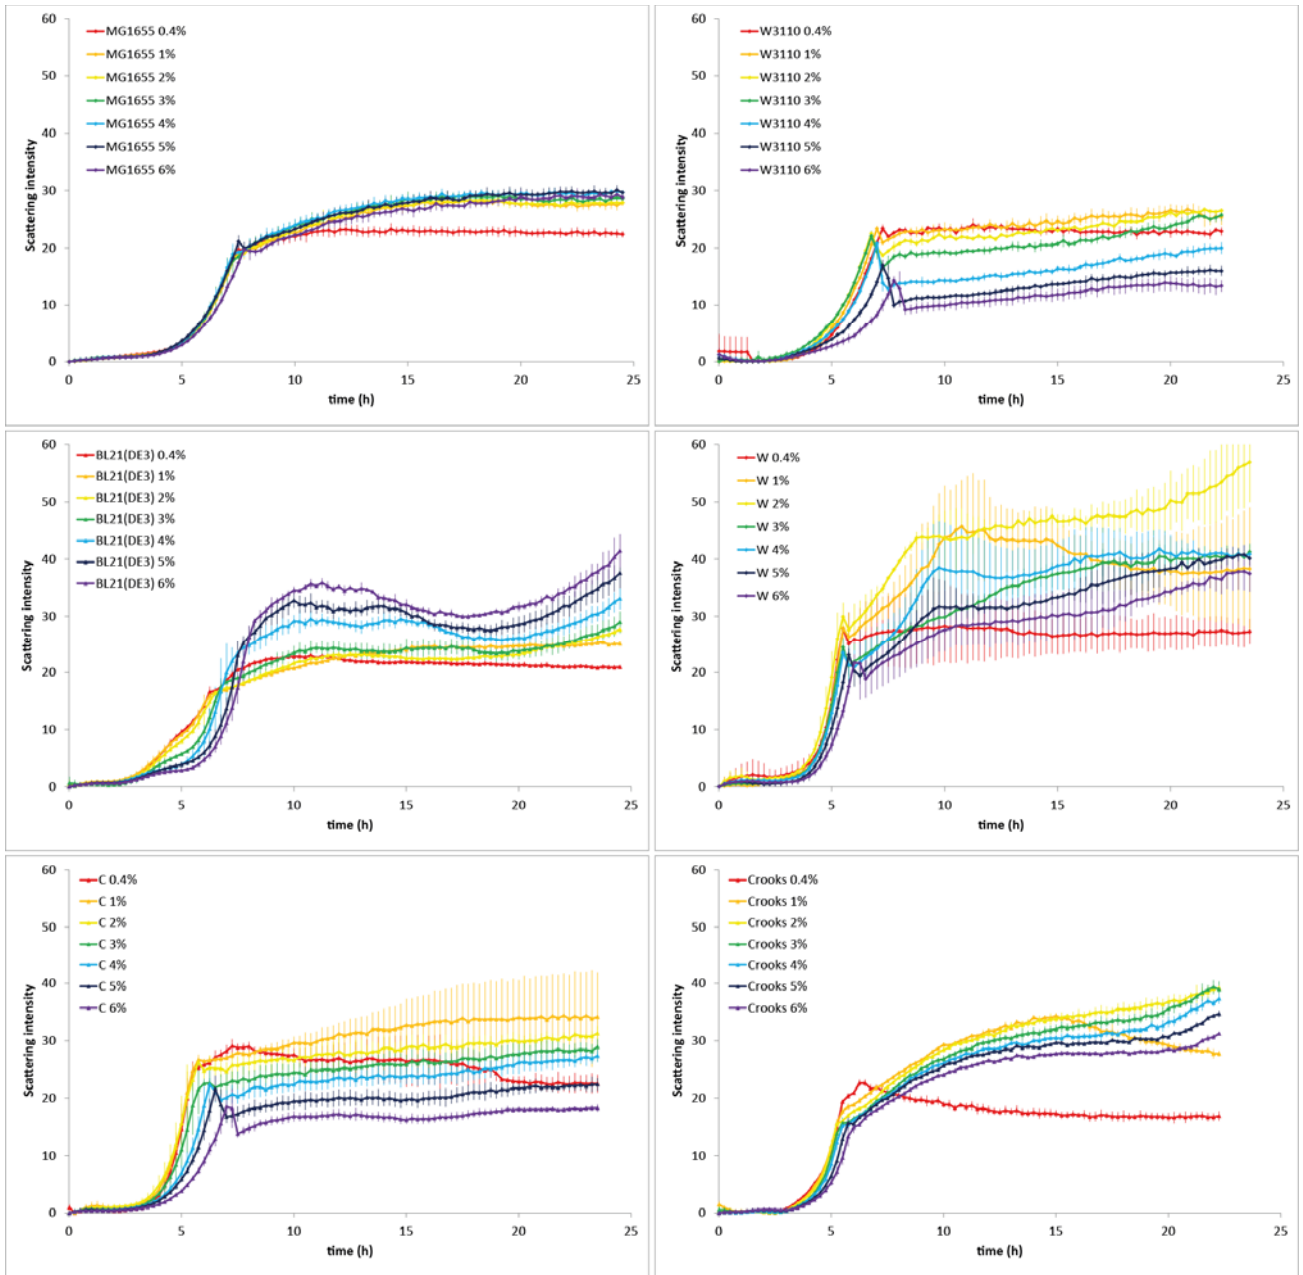

1  
2

3 **Fig. S2.** Growth curves for K-12 MG1655 (top left), K-12 W3110 (top right), BL21(DE3) (middle  
4 left), W (middle right), C (bottom left), and Crooks (bottom left) grown with a concentration series of  
5 glucose between 0.4% and 6% w/v. The indicated glucose concentration was present in the culture  
6 medium from the time of inoculation.

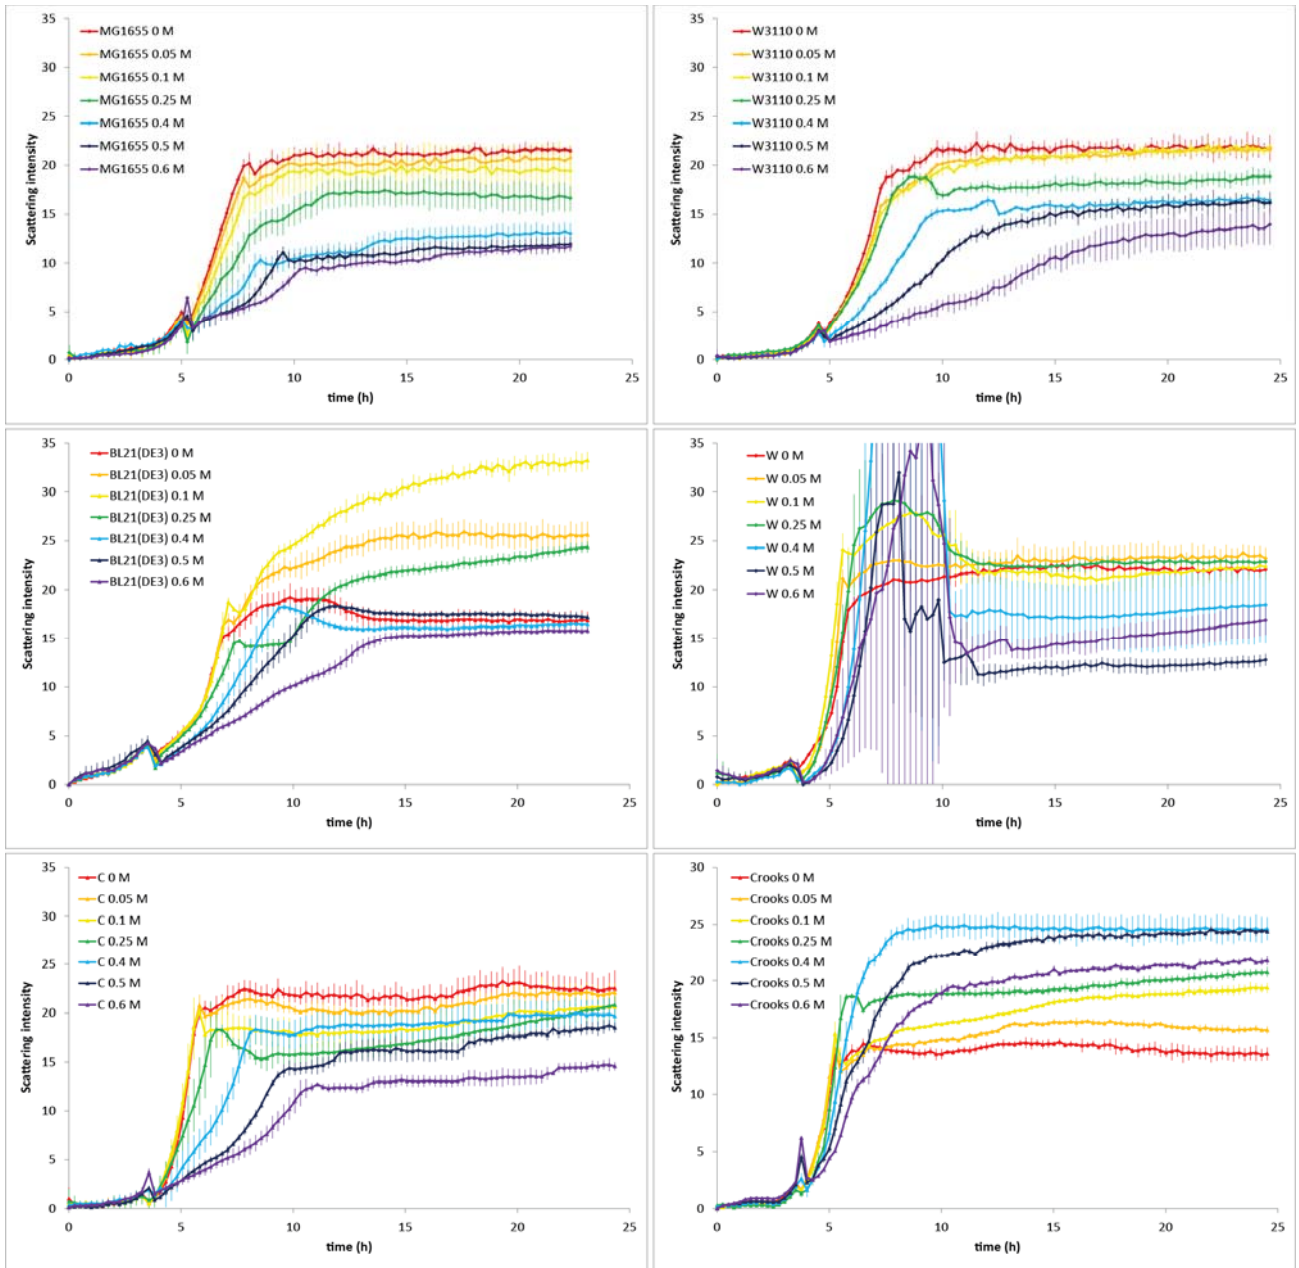

1  
2 **Fig. S3.** Growth curves for K-12 MG1655 (top left), K-12 W3110 (top right), BL21(DE3) (middle  
3 left), W (middle right), C (bottom left), and Crooks (bottom left) grown with a concentration series of  
4 NaCl (in addition to that present already in M9 medium) between 0 M and 0.6 M. NaCl was added  
5 during exponential growth (5 h for MG1655; 4.5 h for W3110; 3.5 h for BL21(DE3), W, C, and  
6 Crooks).



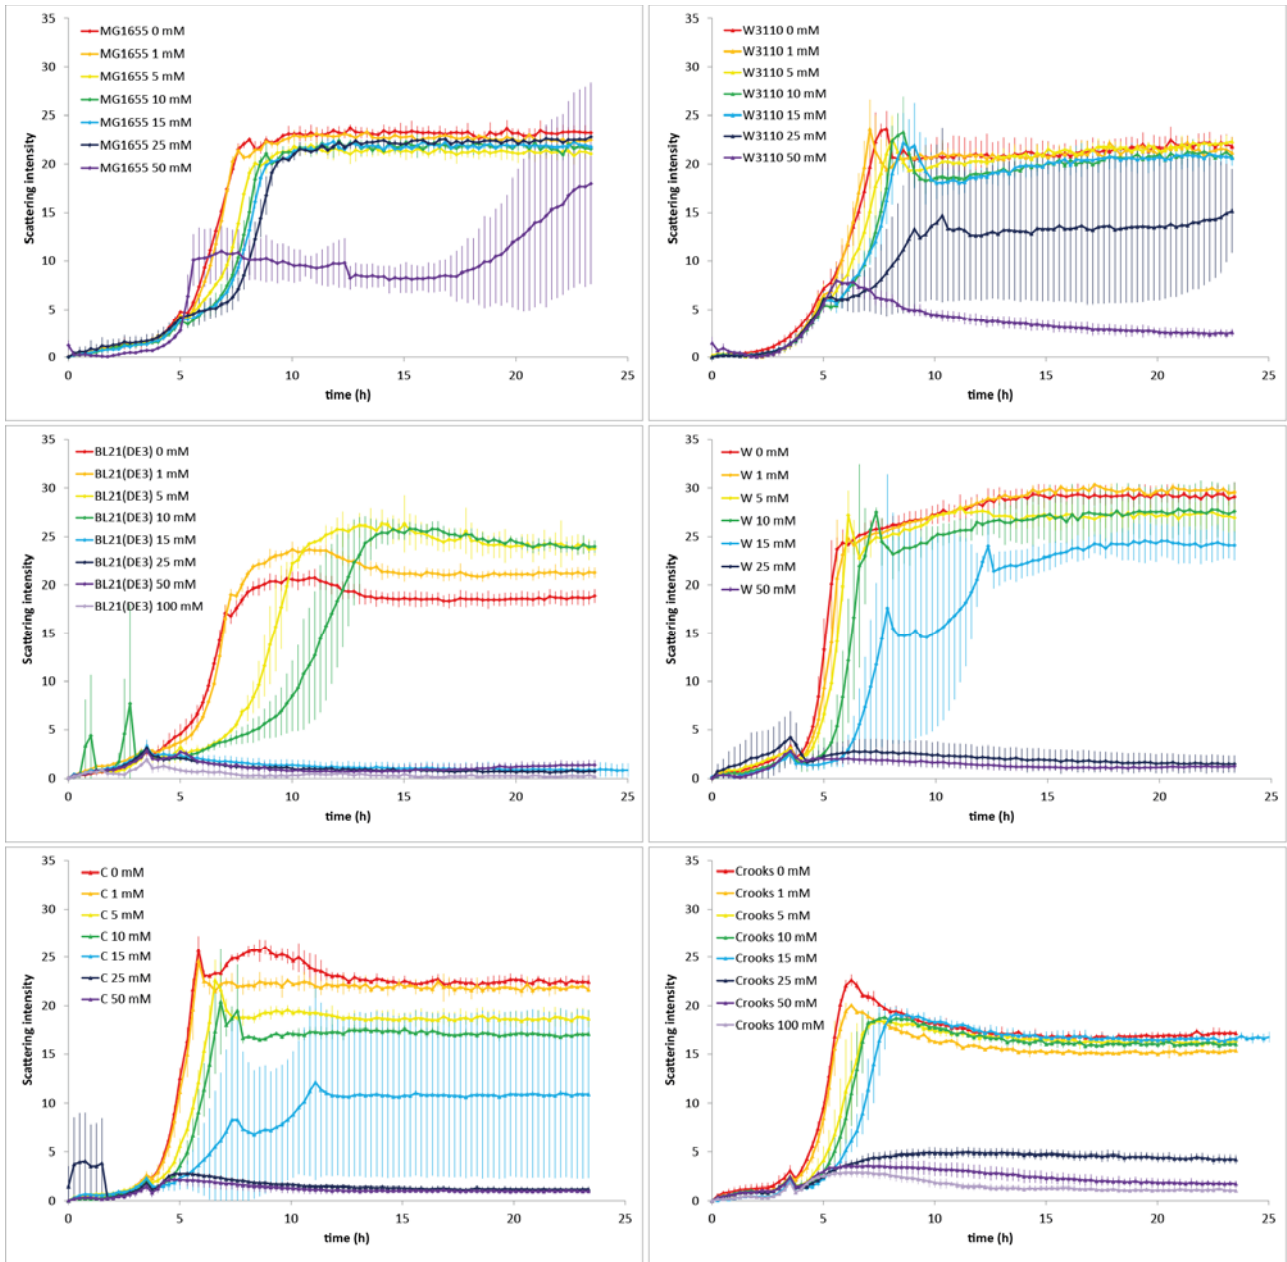

1

2 **Fig. S4.** Growth curves for K-12 MG1655 (top left), K-12 W3110 (top right), BL21(DE3) (middle  
 3 left), W (middle right), C (bottom left), and Crooks (bottom left) grown with a concentration series of  
 4 H<sub>2</sub>O<sub>2</sub> between 0 and 100 mM. H<sub>2</sub>O<sub>2</sub> was added during exponential growth (5 h for MG1655 and  
 5 W3110; 3.5 h for BL21(DE3), W, C, and Crooks).

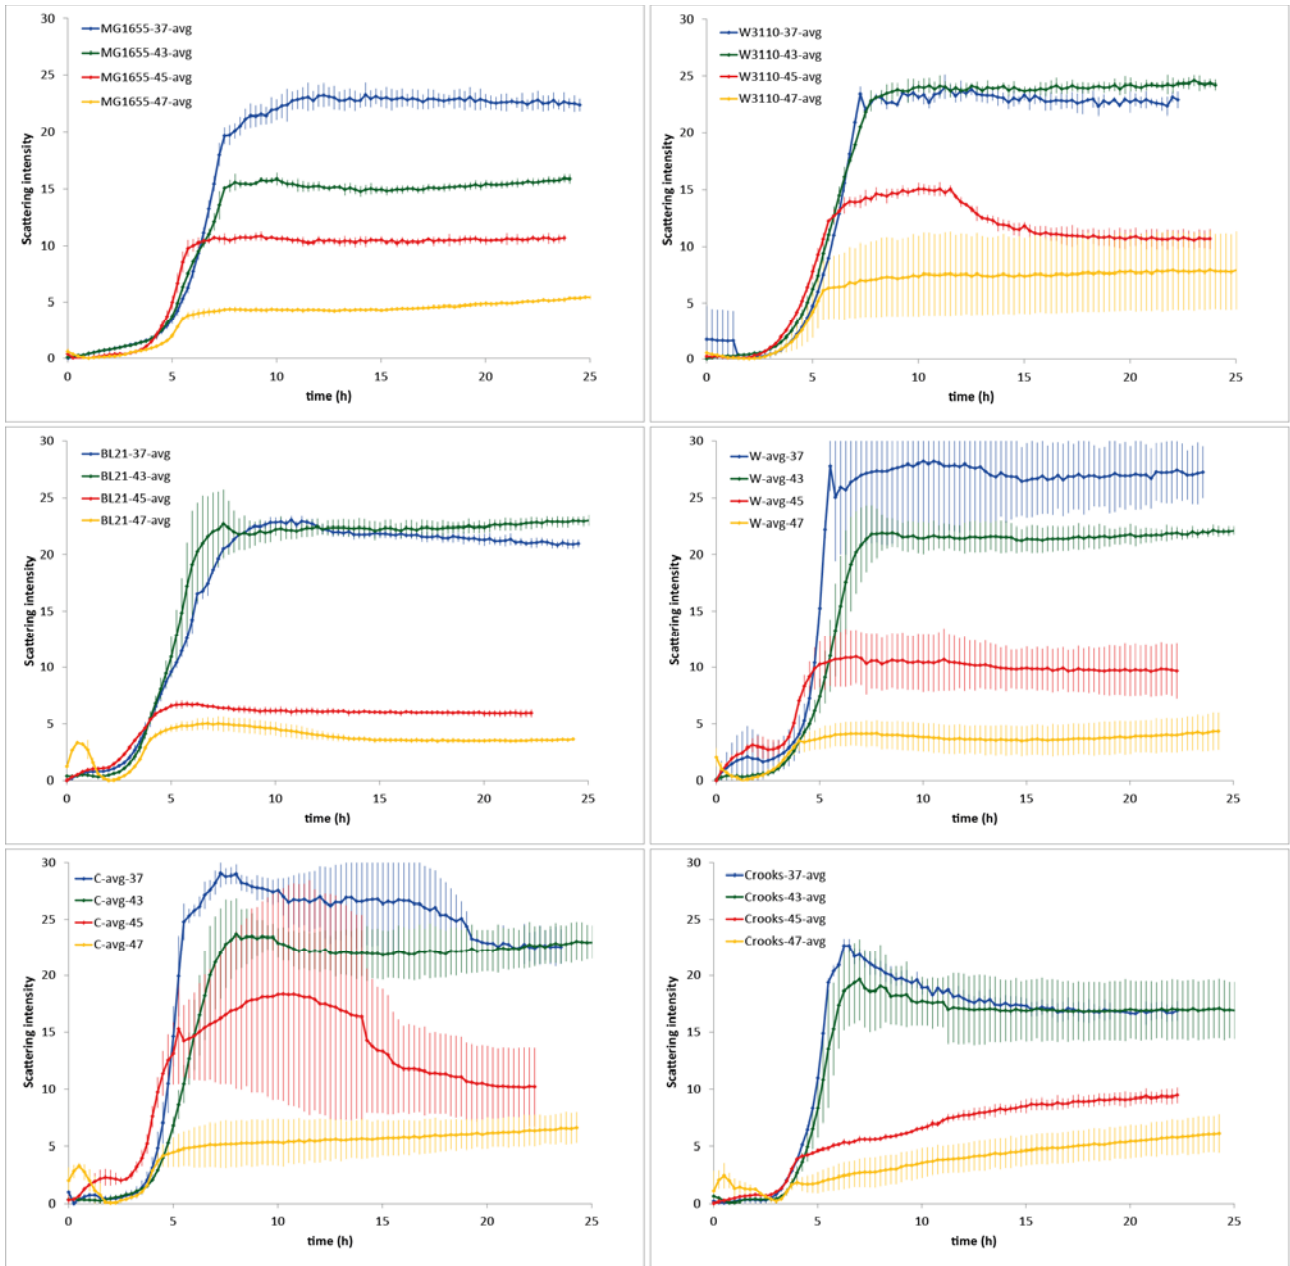

1

2 **Fig. S5.** Growth curves for K-12 MG1655 (top left), K-12 W3110 (top right), BL21(DE3) (middle  
 3 left), W (middle right), C (bottom left), and Crooks (bottom left) cultivated at 37°C with step increases  
 4 in temperature applied during exponential growth (5 h for MG1655 and W3110; 3.5 h for BL21(DE3),  
 5 W, C, and Crooks).

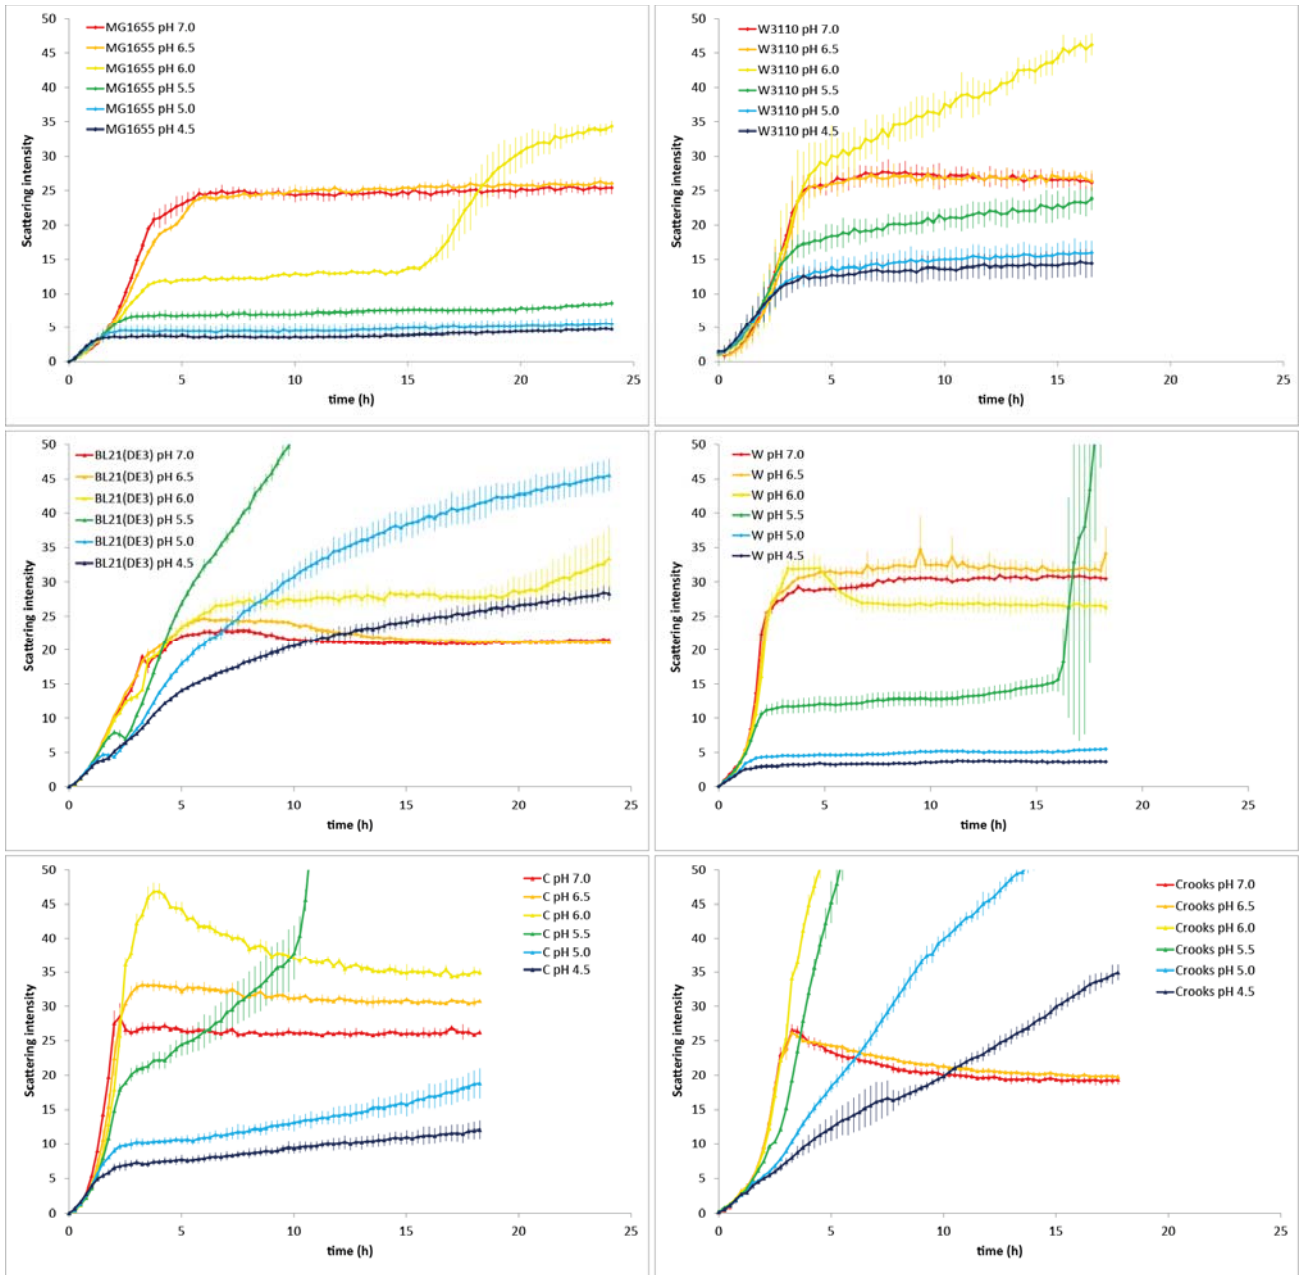

1

2 **Fig. S6.** Growth curves for K-12 MG1655 (top left), K-12 W3110 (top right), BL21(DE3) (middle  
3 left), W (middle right), C (bottom left), and Crooks (bottom left) cultivated in M9 pH 7.0 until mid-  
4 exponential growth and subsequently transferred into M9 adjusted to different pH values (transfers  
5 were performed when the following  $OD_{600}$  values were measured for each strains: 1.0 for K-12  
6 MG1655, 1.1-1.6 for K-12 W3110, 0.55 for BL21(DE3), 1.1-1.9 for W, 1.0-1.1 for C, and 1.5-1.6 for

1 Crooks). Online growth monitoring began after transferring cells to the media with varying pH values,  
2 with the initial scattering intensity subtracted out from all later scattering intensity values in each plot.  
3

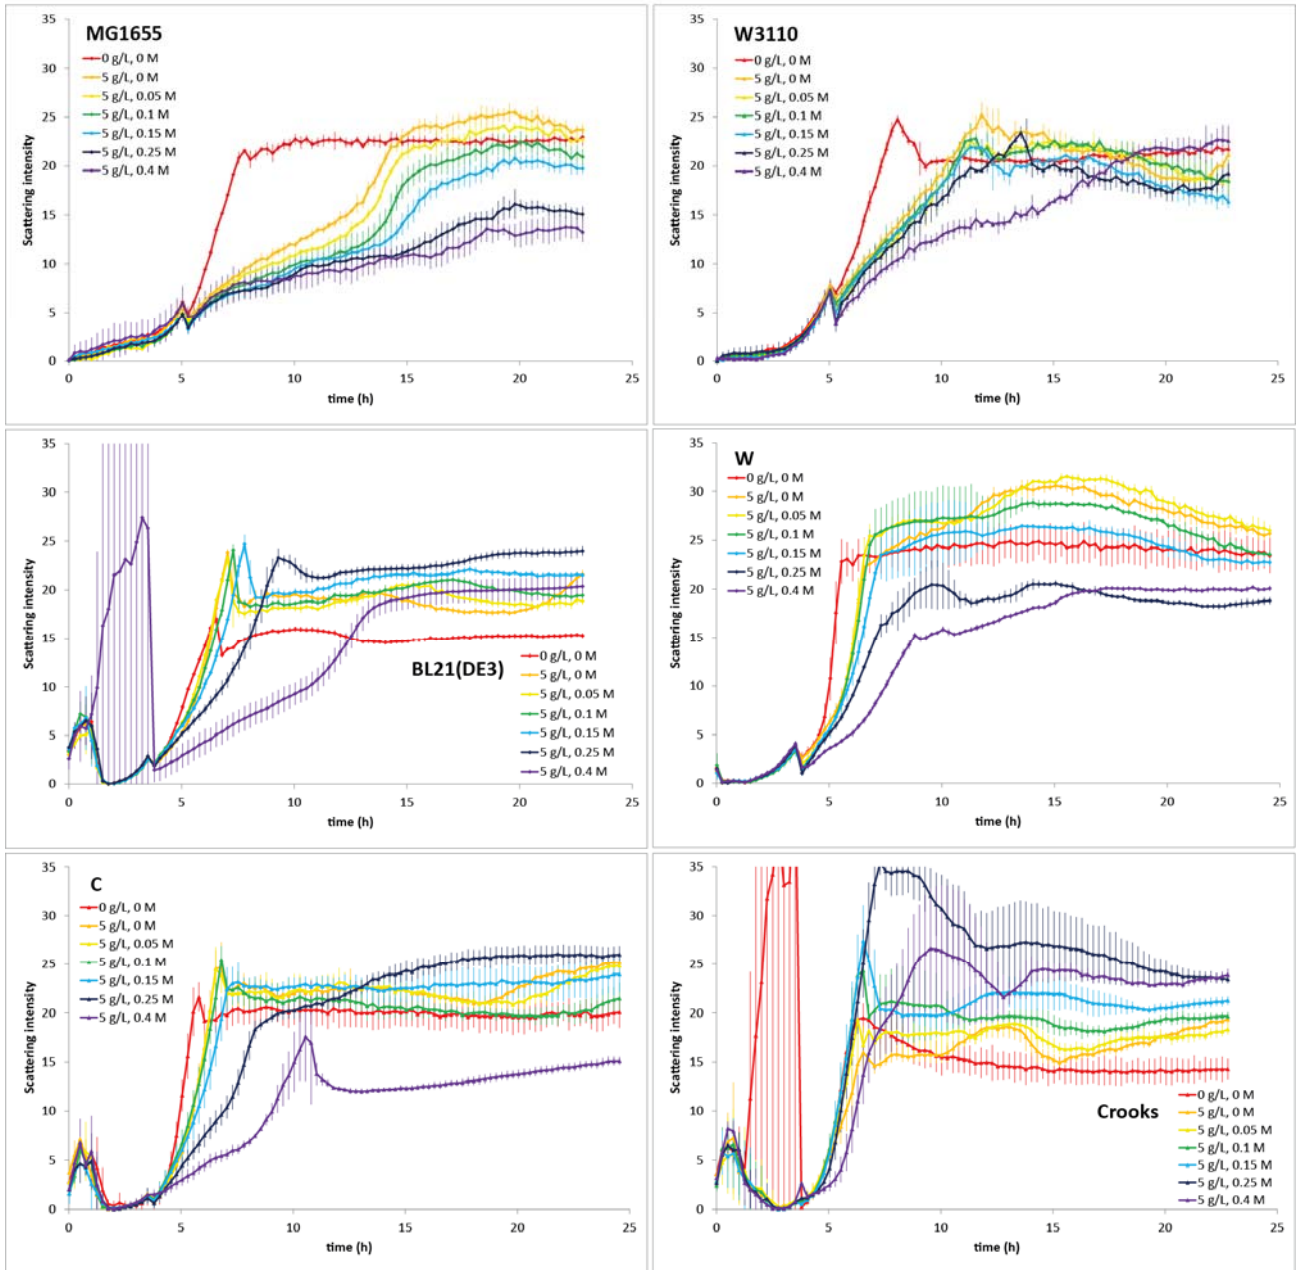

1  
 2 **Fig. S7.** Growth curves for K-12 MG1655 (top left), K-12 W3110 (top right), BL21(DE3) (middle  
 3 left), W (middle right), C (bottom left), and Crooks (bottom left) grown with 5 g/L sodium acetate and  
 4 a concentration gradient of NaCl from 0 to 0.4 M (no added sodium acetate or NaCl is shown in the red  
 5 curves as a control). Sodium acetate and NaCl were added during exponential growth (5 h for MG1655  
 6 and W3110; 3.5 h for BL21(DE3), W, C, and Crooks).

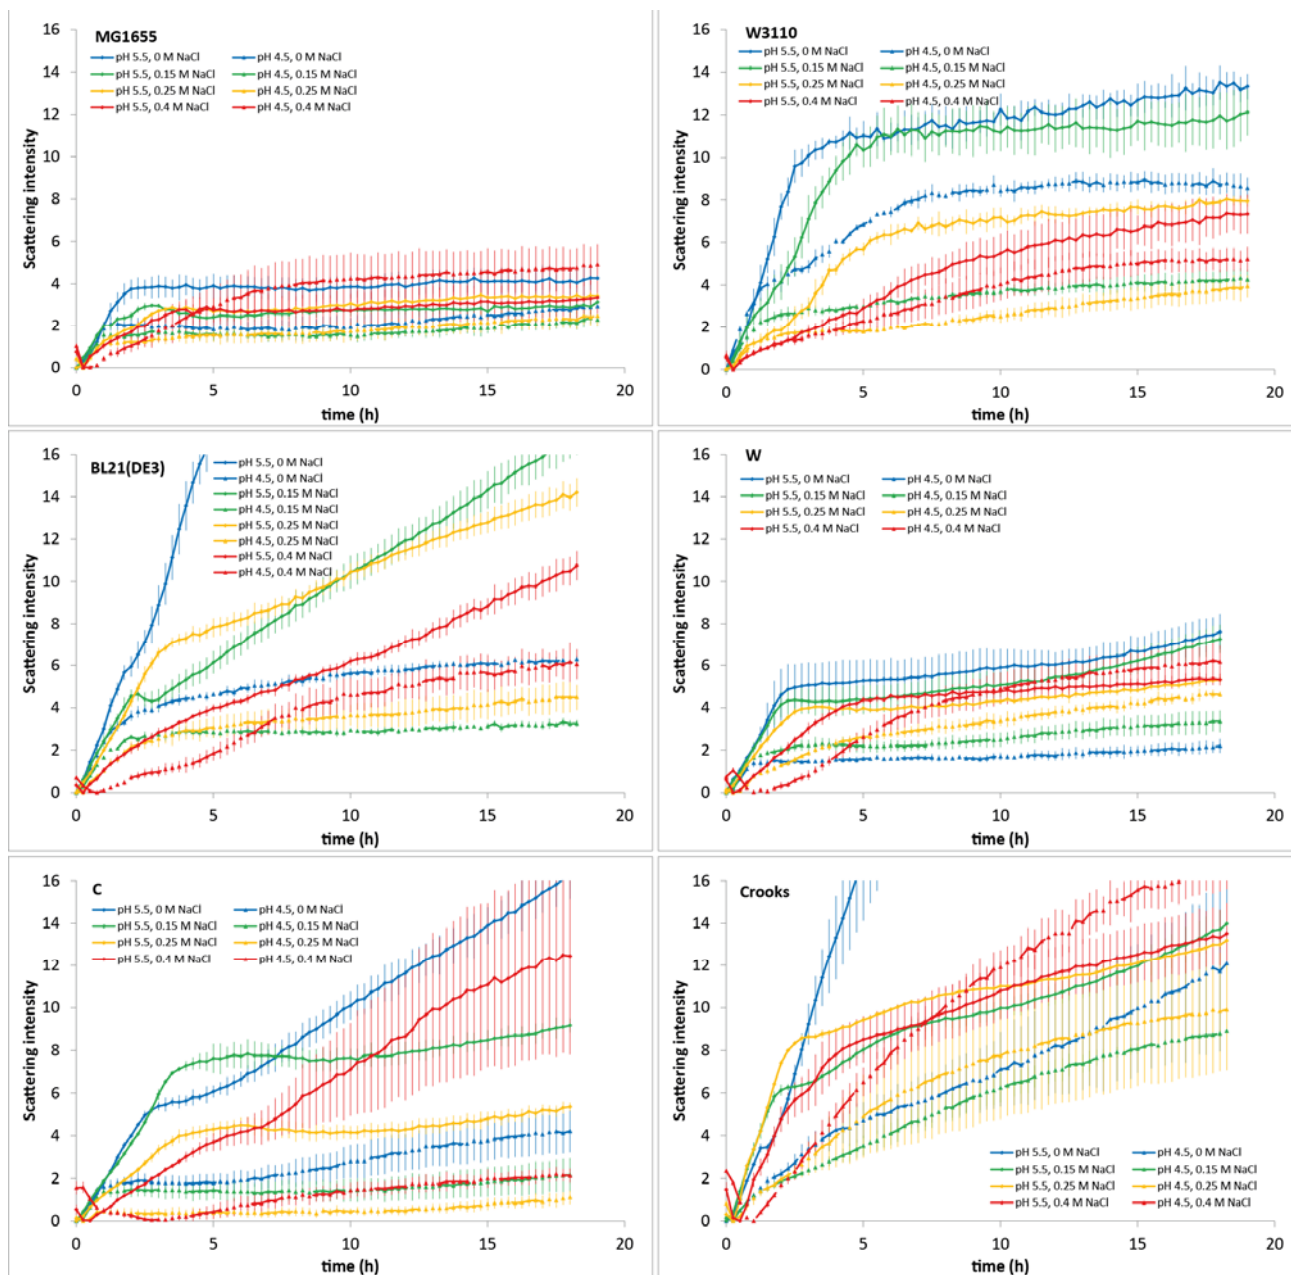

1  
 2 **Fig. S8.** Growth curves for K-12 MG1655 (top left), K-12 W3110 (top right), BL21(DE3) (middle  
 3 left), W (middle right), C (bottom left), and Crooks (bottom left) grown in pH 5.5 or 4.5 and a  
 4 concentration gradient of NaCl from 0 to 0.4 M. Cells were transferred to low pH media containing  
 5 different NaCl concentrations during exponential growth (at the following OD<sub>600</sub> values for each  
 6 strains: 0.6 for K-12 MG1655, 0.5-0.6 for K-12 W3110, 0.4 for BL21(DE3), 0.4-0.5 for W, 0.4 for C,  
 7 and 0.4 for Crooks). Online monitoring of growth began after transfer as described under Fig. S6.



1

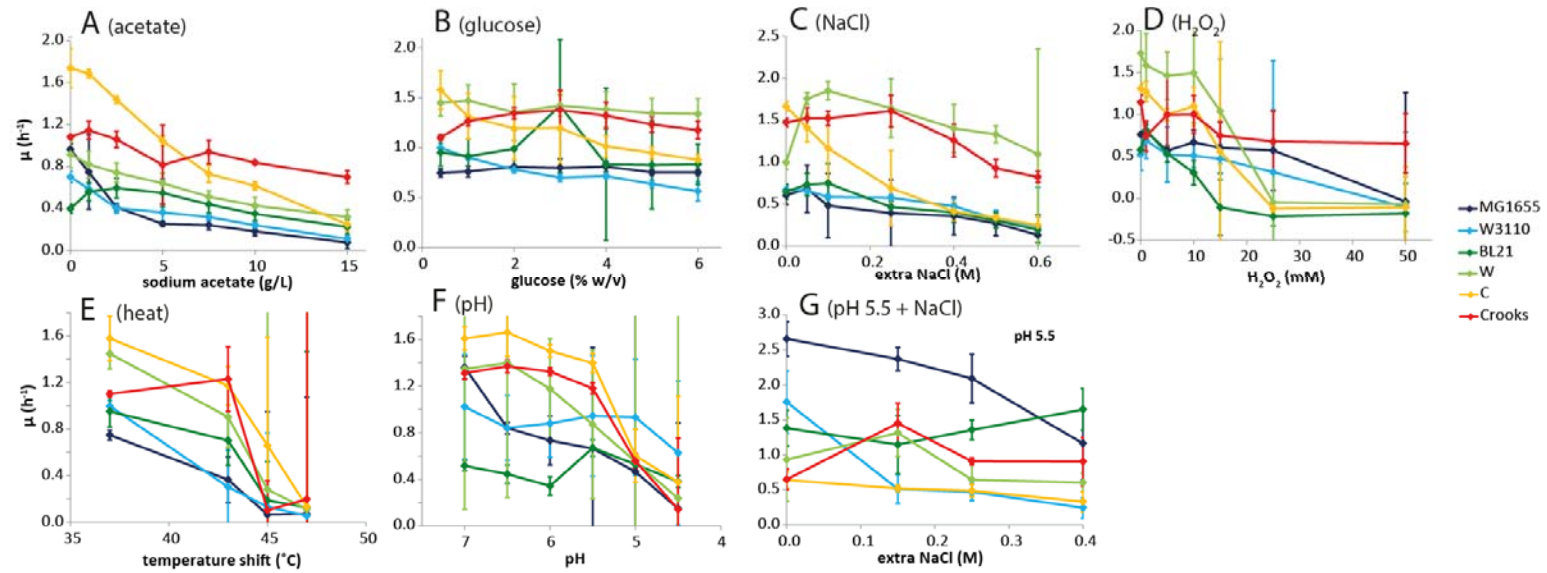

2

3 **Fig. S9.** Absolute growth rates ( $\mu$ ) for six strains of *E. coli* grown in M9 + 0.4% glucose and exposed during mid-log phase to  
4 the different stressors indicated, with the exception of high glucose concentrations, which were present from inoculation. (A)  
5 Addition of sodium acetate to final concentrations between 0 to 15 g/L. (B) Presence of varying concentrations of glucose  
6 between 0.4% to 6% w/v upon inoculation. (C) Addition of extra sodium chloride (beyond that present already in M9 medium)  
7 to final concentrations between 0 to 0.6 M. (D) Addition of hydrogen peroxide to final concentrations between 0 to 50 mM. (E)  
8 Shift to temperatures between 37 $^{\circ}\text{C}$  (no shift) and 47 $^{\circ}\text{C}$ . (F) Transfer of cells to M9 medium with pH values between 4.5 to 7.  
9 (G) Shift to M9 acidified to pH 5.5 and with addition of extra sodium chloride between 0 to 0.4 M. Errors bars represent  
10 propagated standard errors about the growth rate calculated for the averaged growth curve for all biological replicates.

1

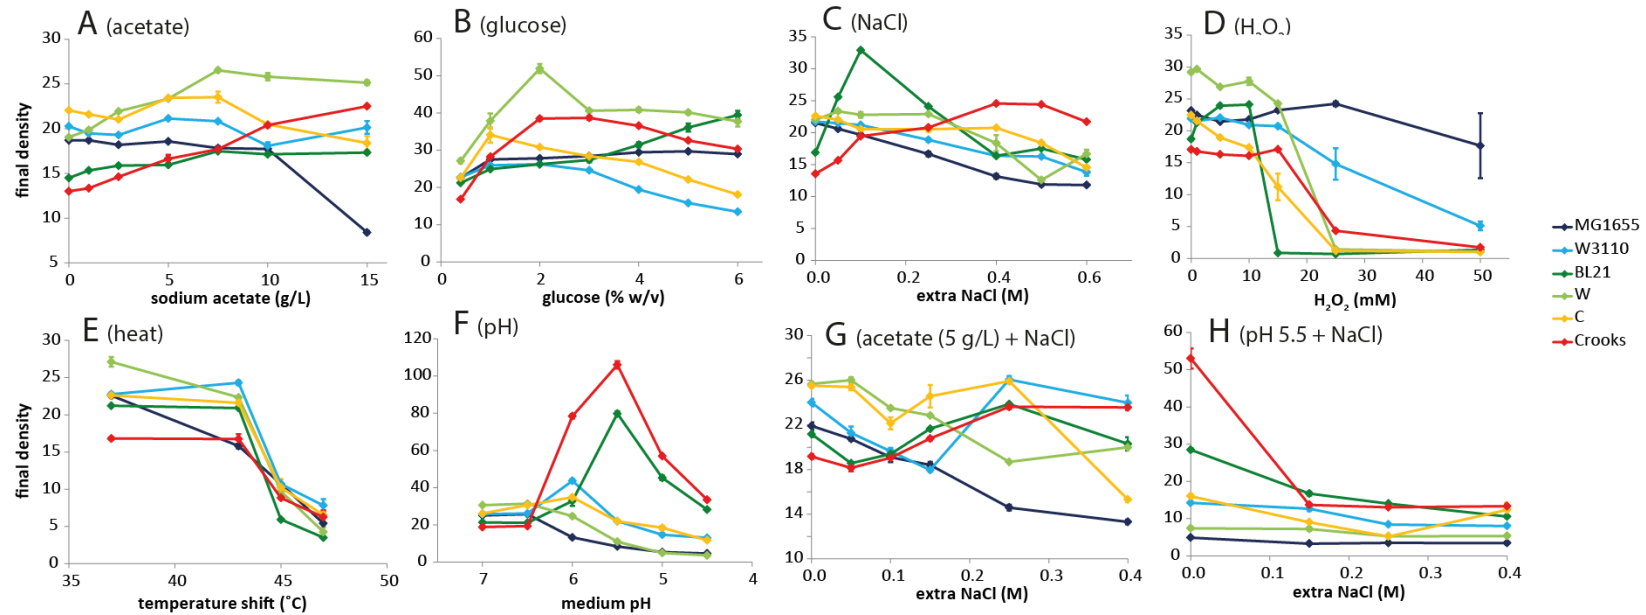

2

3

4 **Fig. S10.** Absolute final densities (arbitrary light backscatter intensity units) for six strains of *E. coli* grown in M9 + 0.4%  
5 glucose and exposed during mid-log phase to the different stressors indicated, with the exception of high glucose concentrations  
6 (B), which were present from inoculation. (A) Addition of sodium acetate to final concentrations between 0 to 15 g/L. (B)  
7 Presence of varying concentrations of glucose between 0.4% to 6% w/v upon inoculation. (C) Addition of extra sodium chloride  
8 (beyond that present already in M9 medium) to final concentrations between 0 to 0.6 M. (D) Addition of hydrogen peroxide to  
9 final concentrations between 0 to 50 mM. (E) Shift to temperatures between 37°C (no shift) and 47°C. (F) Transfer of cells to  
10 M9 medium with pH values between 4.5 to 7. (G) Addition of 5 g/L sodium acetate and extra sodium chloride between 0 to 0.4  
11 M. (H) Shift to M9 acidified to pH 5.5 and with addition of extra sodium chloride between 0 to 0.4 M. Error bars represent  
12 standard errors about the final density calculated for the averaged growth curve for all biological replicates.



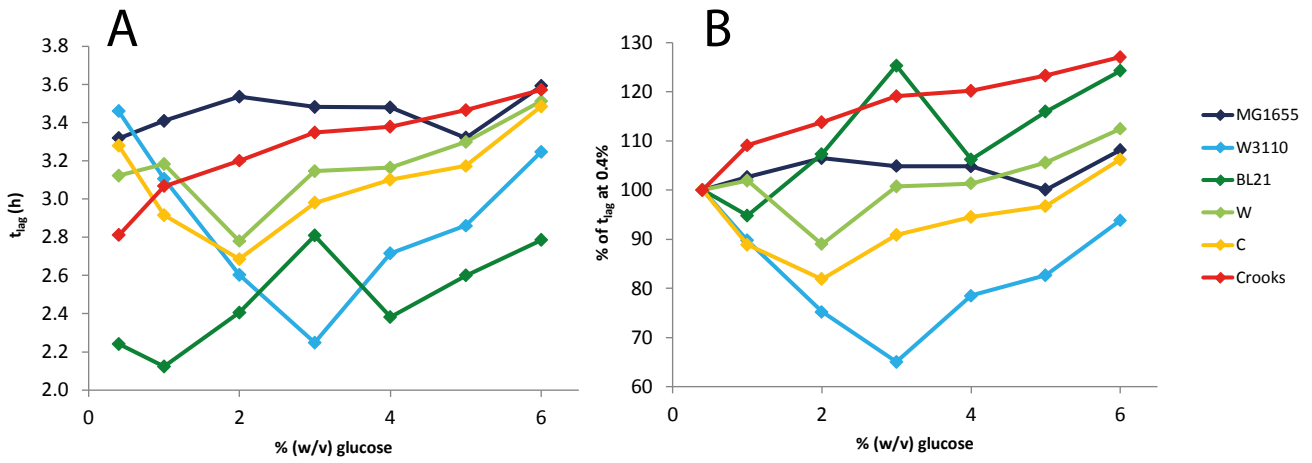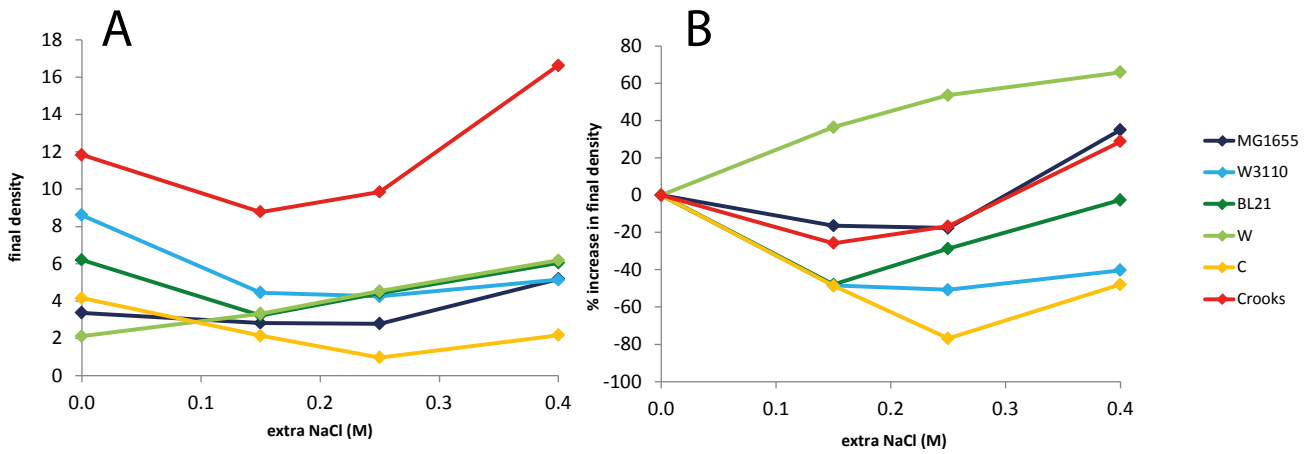

1  
2  
3

4

5 **Fig. S11.** Top: (A) Lag times and (B) percent of lag time for growth on 0.4% glucose for cells grown  
 6 in a concentration series of glucose between 0.4% to 6%. Bottom: (A) final density and (B) percent of  
 7 final density for growth at pH 4.5 with no additional NaCl, for cells transferred to media at pH 4.5 with  
 8 a concentration series of NaCl between 0 to 0.4 M.

1

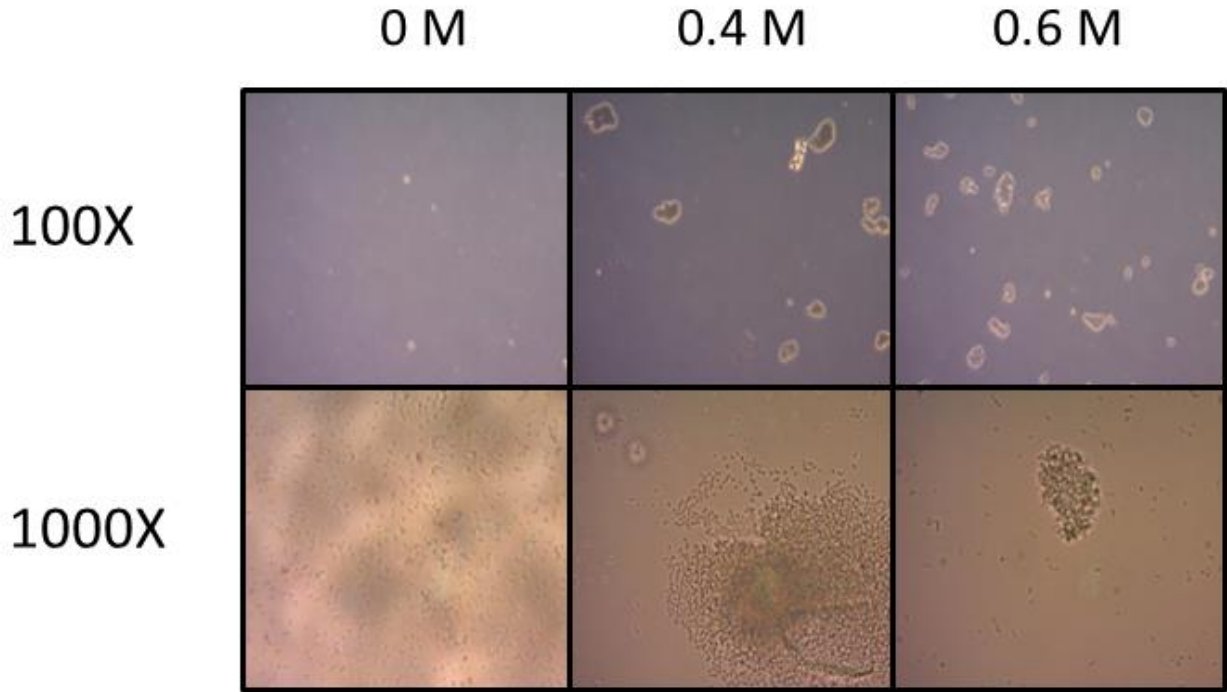

2

3 **Fig. S12.** *E. coli* W sampled during the early stationary phase of growth (8 hours post-inoculation) in  
4 M9 containing no additional NaCl, M9 + 0.4 M NaCl, and M9 + 0.6 M NaCl and observed directly  
5 under phase contrast microscopy at 100X and 1000X total magnification. No cell aggregants were  
6 observed under the control condition (left), with individual cells visible at 1000X magnification. Very  
7 large clumps visible at low magnification were observed with the addition of 0.4 to 0.6 M NaCl, which  
8 are the likely cause of large standard deviations in light scatter intensities in Fig. S3 for strain W.

9

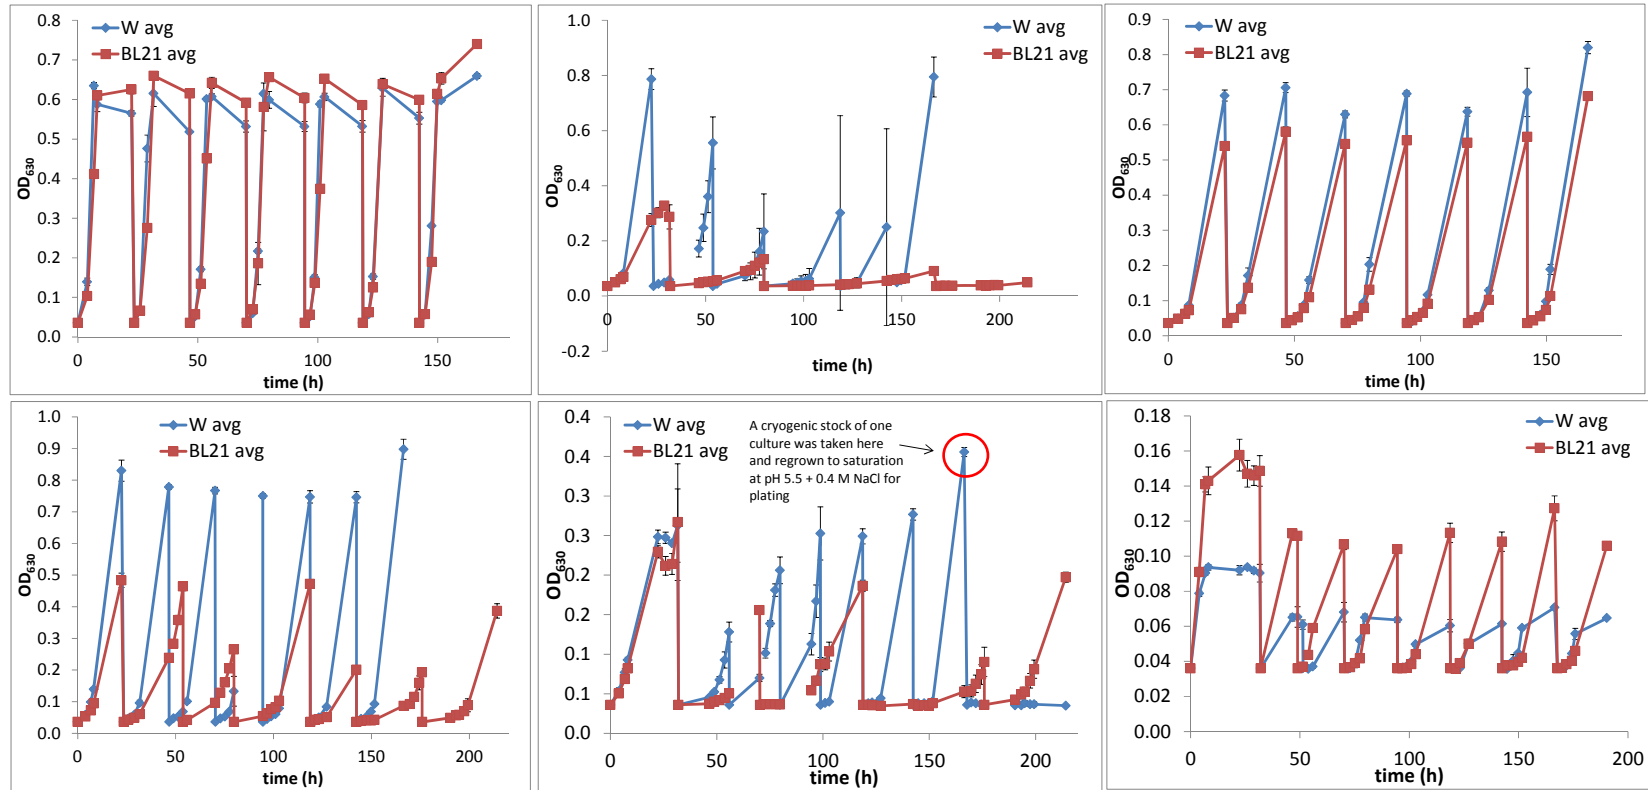

1  
2 **Fig. S13.** Serial passing growth profiles of Tn5 insertion libraries of W and BL21(DE3) in M9 medium (top left), M9 + 0.6 M  
3 NaCl (top middle), M9 + 15 g/L NaAc (top right), M9 + 5 g/L NaAc + 0.4 M NaCl (bottom left), M9 pH 5.5 + 0.4 M NaCl  
4 (bottom middle), and M9 pH 4.5 (top right). Optical densities were measured using 0.1 mL of cell culture in a 96 well plate at a  
5 wavelength of 630 nm on a BioTek ELx808 plate reader. Error bars represent standard deviations about the mean optical density  
6 for three replicate cultures. An error inoculating the final culture of the W library grown at pH 5.5 + 0.4 M NaCl necessitated  
7 regrowing the selected population from a cryogenic stock harvested at the time indicated. The culture reached an OD<sub>600</sub> of 1.34  
8 (spectrophotometer with 1 cm pathlength) after approximately 24 hours growth, which was nearly equal to the average OD<sub>600</sub> of  
9 1.36 measured at the circled point.

| elapsed (h)      | W         |           |           |                   |            |            | BL21      |            |           |                   |            |           |
|------------------|-----------|-----------|-----------|-------------------|------------|------------|-----------|------------|-----------|-------------------|------------|-----------|
|                  | M9        | 0.6 M     |           | 5 g/L Ac, pH 5.5, |            | pH 4.5     | M9        | 0.6 M      |           | 5 g/L Ac, pH 5.5, |            | pH 4.5    |
|                  |           | NaCl      | 15 g/L Ac | 0.4 M NaCl        | 0.4 M NaCl |            |           | NaCl       | 15 g/L Ac | 0.4 M NaCl        | 0.4 M NaCl |           |
| 0                | 0         | 0         | 0         | 0                 | 0          | 0          | 0         | 0          | 0         | 0                 | 0          | 0         |
| 24               | X         | 0         | 0         | 0                 | 0          | .          | 0         | 0          | 0         | 0                 | 0          | 0         |
| 30               |           | 0         | 0         | 0                 | 0          | -          | 0         | 0          | 0         | 0                 | 0          | .         |
| 45               |           | 0         | .         | .                 | .          | .          | X         | 0          | 0         | 0                 | 0          | .         |
| 53.5             |           | 0         | X         | X                 | X          | X          |           | 0          | 0         | 0                 | 0          | X         |
| 75.7             |           | .         |           |                   |            |            |           | 0          | X         | .                 | .          |           |
| 99.3             |           | X         |           |                   |            |            |           | .          |           | X                 | X          |           |
| 117              |           |           |           |                   |            |            |           | .          |           |                   |            |           |
| 144              |           |           |           |                   |            |            |           | X          |           |                   |            |           |
| <b>total (h)</b> | <b>24</b> | <b>99</b> | <b>54</b> | <b>54</b>         | <b>54</b>  | <b>54*</b> | <b>45</b> | <b>144</b> | <b>76</b> | <b>99</b>         | <b>99</b>  | <b>54</b> |

after serial passaging

| elapsed (h)      | W  |           |           |                   |             |           | BL21 |          |           |                   |             |          |
|------------------|----|-----------|-----------|-------------------|-------------|-----------|------|----------|-----------|-------------------|-------------|----------|
|                  | M9 | 0.6 M     |           | 5 g/L Ac, pH 5.5, |             | pH 4.5    | M9   | 0.6 M    |           | 5 g/L Ac, pH 5.5, |             | pH 4.5   |
|                  |    | NaCl      | 15 g/L Ac | 0.4 M NaCl        | 0.4 M NaCl* |           |      | NaCl     | 15 g/L Ac | 0.4 M NaCl        | 0.4 M NaCl  |          |
| 0                |    | 0         | 0         | 0                 | 0           |           |      |          | 0         |                   |             |          |
| 23               |    | 0         | 0         | 0                 | 0           | 0         |      |          | 0         |                   |             | 0        |
| 47               |    | 0         | .         | .                 | 0           | .         |      |          | 0         | 0                 | 0           | 0        |
| 54               |    | 0         | X         | X                 | 0           | X         |      |          | .         | 0                 | 0           | 0        |
| 71               |    | X         |           |                   | .           |           |      | 0        | X         | 0                 | 0           | 0        |
| 101              |    |           |           |                   | X           |           |      | 0        |           | 0                 | 0(X)        | 0        |
| 120              |    |           |           |                   |             |           |      | 0        |           | .                 | 0           | 0        |
| 143              |    |           |           |                   |             |           |      | 0        |           | .                 | 0           | 0        |
| 150              |    |           |           |                   |             |           |      | 0        |           | X                 | 0           | 0        |
| 167              |    |           |           |                   |             |           |      | 0        |           |                   | 0           | 0        |
| 174              |    |           |           |                   |             |           |      | 0        |           |                   | 0           | 0        |
| <b>total (h)</b> |    | <b>71</b> | <b>54</b> | <b>54</b>         | <b>98</b>   | <b>31</b> |      | <b>∞</b> | <b>71</b> | <b>103</b>        | <b>(54)</b> | <b>∞</b> |

1  
2 **Fig. S14.** Estimated elapsed times to observe colony growth of Tn5 insertion libraries of *E. coli* W and  
3 BL21(DE3) on M9 plates containing high sodium chloride and/or high sodium acetate concentrations,  
4 low pH, and low pH and high sodium chloride concentrations. The top table is for cells plated directly  
5 without serial passaging, and the bottom table is for cells plated after serial passaging. '0' indicates no  
6 growth was observed at the corresponding elapsed time, '.' indicates that only very small colonies were  
7 observed, and 'X' indicates the time at which colonies were large enough to assess the size distribution  
8 (and was when colonies were selected for propagation and subsequent secondary screening). Blank  
9 entries before '0' are at times prior to when plates were spread with cells. For passaged BL21(DE3)  
10 libraries in some conditions (0.6 M NaCl, pH 5.5 + 0.4 M NaCl, and pH 4.5), no colonies were

1 observed to grow on plates despite growth of cells in liquid culture. Two colonies were observed for  
2 the BL21(DE3) library plated on pH 5.5 + 0.4 M NaCl plates after approximately 50 hours, however  
3 later sequencing of the Tn5 location revealed that these colonies were actually strain W.

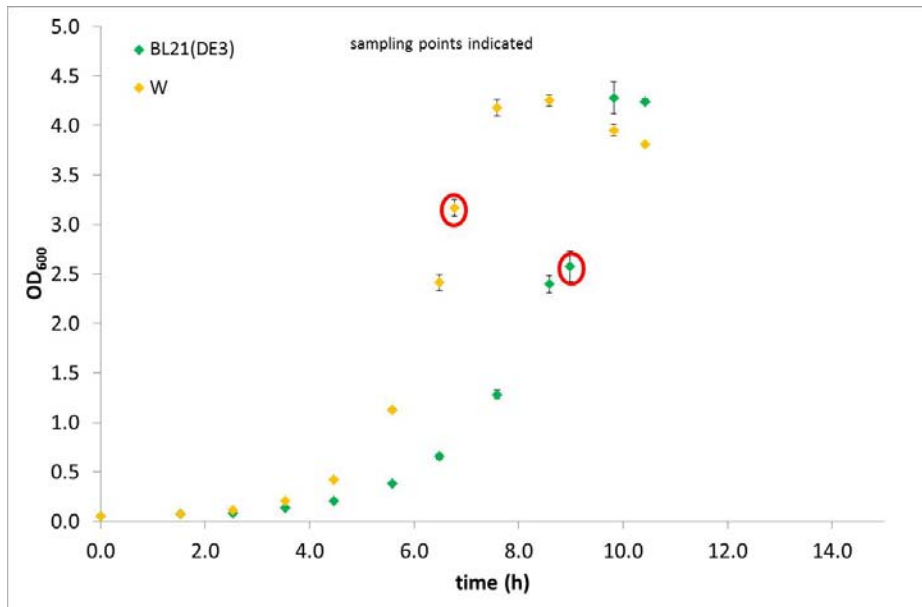

1

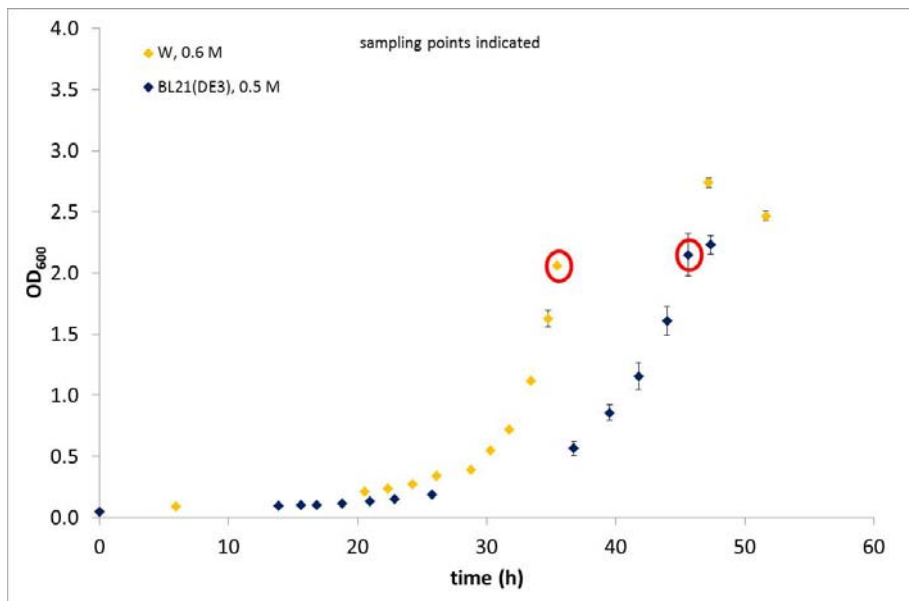

2

3 **Fig. S15.** Growth curves for Tn5 libraries of strains W and BL21(DE3) selected in M9 medium (top)  
 4 and M9 + 0.6 M NaCl for W or 0.5 M NaCl for BL21(DE3) (bottom). Each point represents the  
 5 average OD<sub>600</sub> of two or three biological replicate cultures. The times when cultures were harvested  
 6 for genomic DNA extraction for Tn-Seq are circled in red.

7

| strain             | % increase in final density |               |               |               |               |                      |                    |
|--------------------|-----------------------------|---------------|---------------|---------------|---------------|----------------------|--------------------|
|                    | M9                          | 0.6 M NaCl    | 0.4 M NaCl    | 15 g/L Ac     | pH 5.5        | 5 g/L Ac, 0.4 M NaCl | pH 5.5, 0.4 M NaCl |
| BL21 $\Delta$ proV | -0.4                        | <b>30.4*</b>  | <b>20.2*</b>  | 1.9           | 7.1           | 10.4                 | 50.8               |
| W $\Delta$ rfe     | <b>-29.7*</b>               | 8.6           | <b>-36.8</b>  | <b>11.7*</b>  | <b>29.8*</b>  | <b>-34.2*</b>        | -11.8              |
| W $\Delta$ evgS    | 1.5                         | -             | 8.0           | 0.2           | -19.0         | 0.1                  | -12.4              |
| W $\Delta$ evgA    | 0.1                         | -2.6          | 8.8           | 2.0           | -15.7         | <b>9.6*</b>          | -11.6              |
| W $\Delta$ typA    | <b>17.5*</b>                | <b>11.4*</b>  | -1.2          | -11.3         | -22.8         | <b>22.1*</b>         | <b>11.8*</b>       |
| W $\Delta$ rcsB    | 6.4                         | 9.0           | 11.4          | <b>7.9*</b>   | 8.6           | -4.1                 | 61.9               |
| W $\Delta$ nagC    | 0.8                         | <b>-18.1*</b> | <b>-13.0*</b> | <b>-16.7*</b> | <b>-44.4*</b> | <b>-31.2*</b>        | <b>-48.1*</b>      |
| W $\Delta$ nagA    | 4.0                         | <b>-12.2*</b> | 6.3           | 17.2          | <b>-27.9*</b> | <b>-38.3*</b>        | <b>-53.3*</b>      |
| W $\Delta$ yobF    | 7.5                         | <b>5.9*</b>   | 0.9           | <b>-15.7*</b> | 48.3          | 9.6                  | <b>55.5*</b>       |
| W $\Delta$ ptsP    | 1.9                         | <b>19.1*</b>  | 5.4           | -6.1          | 58.8          | 3.2                  | <b>42.0*</b>       |
| W $\Delta$ ackA    | -1.9                        | <b>9.8*</b>   | <b>50.5*</b>  | <b>-12.5*</b> | 6.1           | <b>-29.6*</b>        | <b>63.3*</b>       |
| W $\Delta$ ygaH    | 0.9                         | 3.7           | <b>31.7*</b>  | 3.5           | 13.4          | 0.6                  | 6.0                |
| W $\Delta$ yciW    | 0.6                         | 6.1           | <b>52.8*</b>  | -5.9          | <b>63.3</b>   | 2.3                  | <b>40.6*</b>       |

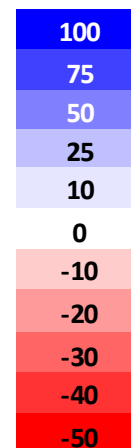

1  
2 **Fig. S16:** Percent increases in final cell density of single gene deletion mutants of W and BL21(DE3)  
3 under the different single and combined stresses analyzed in this study. Values are bolded if  
4 statistically significant with  $P < 0.05$ , and colored green if a positive value and red if a negative value.  
5 Boxed areas indicate the condition for which Tn5 insertions in the deleted genes were originally  
6 isolated.

7

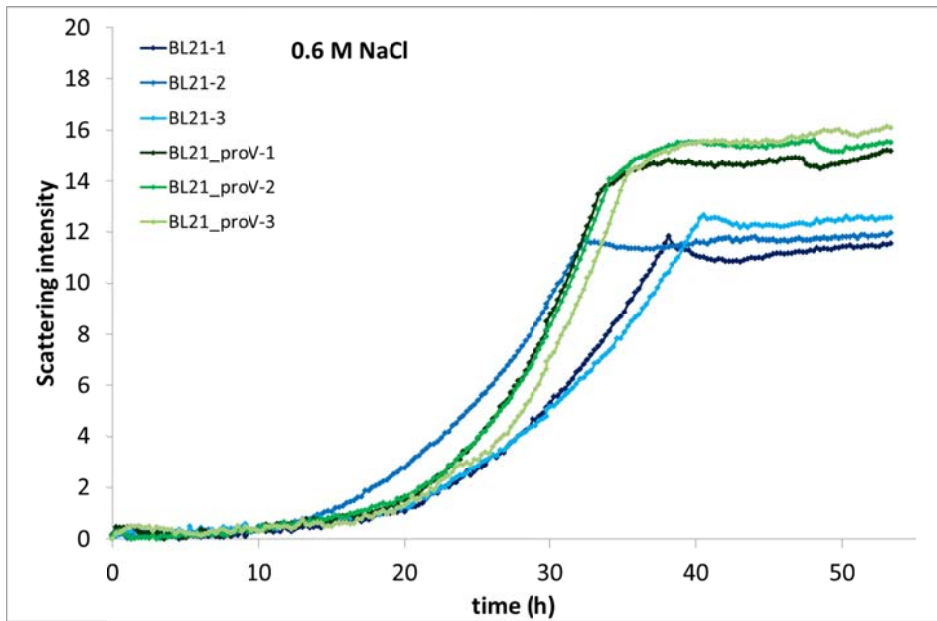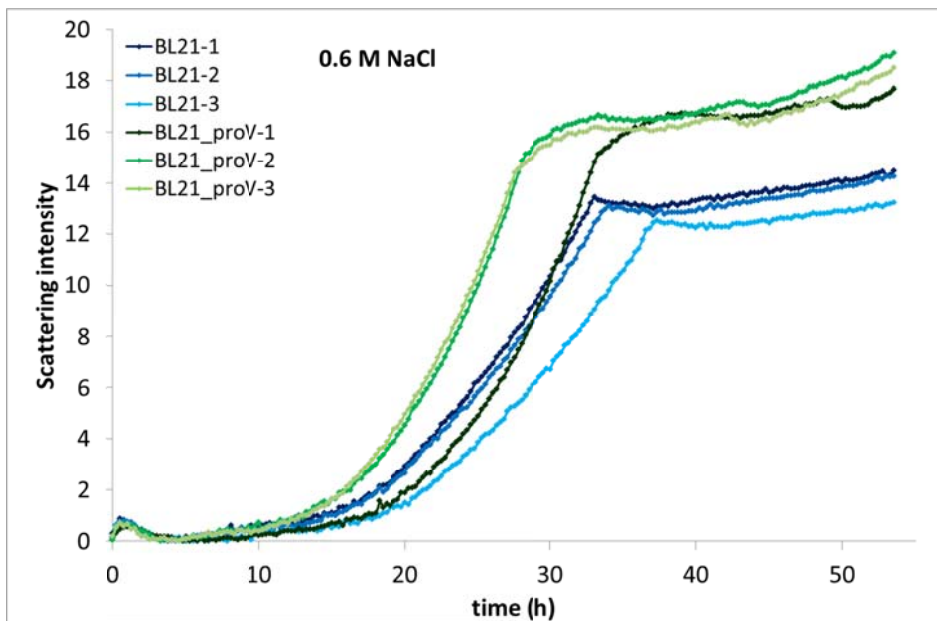

**Fig. S17.** Growth curves from two independent experiments with biological triplicate cultures of BL21(DE3) and BL21(DE3)  $\Delta$ *proV* grown in M9 + 0.6 M NaCl in a BioLector microbioreactor system as described in Materials and Methods.



| strain (1/2)           | % increase in $\mu$ over KO1, KO2 |           |                      |                    | % increase in $\mu$ over W |                | % decrease in $t_{lag}$ over KO1, KO2 |           |                      |                    | % decrease in $t_{lag}$ over W |                | % increase in final density over KO1, KO2 |           |                      |                    | % increase in final density over W |                |       |       |       |
|------------------------|-----------------------------------|-----------|----------------------|--------------------|----------------------------|----------------|---------------------------------------|-----------|----------------------|--------------------|--------------------------------|----------------|-------------------------------------------|-----------|----------------------|--------------------|------------------------------------|----------------|-------|-------|-------|
|                        | 0.6 M NaCl                        | 15 g/L Ac | 5 g/L Ac, 0.4 M NaCl | pH 5.5, 0.4 M NaCl | cond KO1 vs. W             | cond KO2 vs. W | 0.6 M NaCl                            | 15 g/L Ac | 5 g/L Ac, 0.4 M NaCl | pH 5.5, 0.4 M NaCl | cond KO1 vs. W                 | cond KO2 vs. W | 0.6 M NaCl                                | 15 g/L Ac | 5 g/L Ac, 0.4 M NaCl | pH 5.5, 0.4 M NaCl | cond KO1 vs. W                     | cond KO2 vs. W |       |       |       |
| <i>Δrfe evgA::kan</i>  |                                   |           |                      | 91                 | -21                        |                |                                       |           |                      |                    | 25.8                           |                |                                           |           |                      |                    | 38.1                               |                |       |       |       |
| <i>Δrfe typA::kan</i>  |                                   |           |                      | 178                |                            |                |                                       |           |                      | 30.9               | 36.7                           |                | 6                                         |           | 108                  |                    | 35.9                               | 132.2          |       |       |       |
| <i>Δrfe nagC::kan</i>  | -24                               |           |                      |                    |                            |                |                                       |           |                      | 41                 |                                |                | -17                                       | 19        |                      |                    |                                    |                |       |       |       |
| <i>Δrfe ptsP::kan</i>  |                                   |           | -13                  |                    |                            |                |                                       |           |                      | 22                 |                                |                |                                           |           | -35                  |                    |                                    |                |       |       |       |
| <i>Δrfe yobF::kan</i>  |                                   | 9         | 10                   |                    |                            |                |                                       |           |                      | -9                 | 25                             |                |                                           | -8        | 17                   |                    |                                    |                |       |       |       |
| <i>Δrfe nagA::kan</i>  | -13                               |           |                      |                    |                            | -13.8          |                                       |           |                      | -15                | 21                             |                | -17                                       | 12        |                      |                    |                                    |                |       |       |       |
| <i>Δrfe ackA::kan</i>  | -15                               |           |                      |                    |                            | -16.7          |                                       |           |                      | -34                | 19                             |                | -18                                       |           |                      |                    | 6.9                                | -33.6          |       |       |       |
| <i>Δrfe ygaH::kan</i>  |                                   |           |                      |                    |                            |                |                                       |           |                      | 59                 |                                |                | 30                                        |           |                      | -26                | 15.7                               |                |       |       |       |
| <i>Δrfe yciW::kan</i>  |                                   |           |                      |                    |                            | -11.3          |                                       |           |                      | 25                 |                                |                | 13                                        |           |                      | -56                | 11.2                               |                |       |       |       |
| <i>ΔevgA typA::kan</i> |                                   |           |                      |                    |                            |                |                                       |           |                      |                    |                                |                |                                           |           |                      |                    |                                    |                |       |       |       |
| <i>ΔevgA nagC::kan</i> |                                   |           |                      | -46                | 61                         |                |                                       |           |                      | -15                |                                |                | 36                                        | 18.9      | -11.4                | -26                |                                    | -47.1          | -21.6 |       |       |
| <i>ΔevgA ptsP::kan</i> |                                   |           |                      |                    |                            |                |                                       |           |                      |                    |                                |                |                                           |           | -37                  | 60                 |                                    |                |       |       |       |
| <i>ΔevgA yobF::kan</i> |                                   |           | 23                   | 36                 | 65                         | 190.9          |                                       |           |                      | 8                  | 39                             |                |                                           |           |                      |                    | 40                                 | 125            | -11.5 |       |       |
| <i>ΔevgA nagA::kan</i> | -12                               | 11        |                      |                    |                            |                |                                       |           |                      | -24                | -23                            |                |                                           |           |                      | -58                | -46.8                              | -23.2          |       |       |       |
| <i>ΔevgA ackA::kan</i> |                                   |           |                      | -5                 | 69                         | 106.7          |                                       |           |                      |                    |                                |                |                                           |           | -34                  | 59                 | 79                                 | 191.8          | -32.8 |       |       |
| <i>ΔevgA ygaH::kan</i> |                                   |           |                      |                    | -34                        |                |                                       |           |                      | -18                | 16                             |                |                                           |           |                      | -39                |                                    |                |       |       |       |
| <i>ΔevgA yciW::kan</i> |                                   |           |                      |                    | -17                        | 39             | 87.8                                  |           |                      | 32                 | 44.4                           |                |                                           |           |                      | 65                 | 26                                 | 204.0          |       |       |       |
| <i>ΔtypA nagC::kan</i> |                                   | 11        |                      |                    | -45                        | 116            |                                       |           |                      | -14                |                                |                |                                           |           |                      | -66                | 41                                 | -51.3          | -9.0  |       |       |
| <i>ΔtypA yobF::kan</i> |                                   |           |                      |                    |                            | 104.3          |                                       |           |                      |                    |                                |                |                                           |           |                      |                    |                                    | 89.8           |       |       |       |
| <i>ΔtypA nagA::kan</i> | -13                               | -12       |                      |                    | 38                         | 58.4           | -12.9                                 |           |                      | -18                | -13                            |                |                                           |           |                      | -61                |                                    | 50.4           | -12.4 |       |       |
| <i>ΔtypA ackA::kan</i> |                                   |           |                      |                    | 54                         | 87.9           | 15.1                                  |           |                      | -12                | 29                             | 32.0           | 11.2                                      |           |                      | -27                | 34                                 | 70             | 177.8 | -14.0 |       |
| <i>ΔtypA ygaH::kan</i> |                                   |           |                      | -61                | -48                        | -38.2          |                                       |           |                      |                    |                                |                |                                           |           |                      | -38                | -32                                |                |       |       |       |
| <i>ΔtypA yciW::kan</i> |                                   |           |                      |                    | 66                         | 125.3          |                                       |           |                      | 22                 | 36.7                           |                |                                           |           |                      | 21                 |                                    | 152.4          |       |       |       |
| <i>ΔnagC ptsP::kan</i> |                                   | 10        |                      | 28                 | -35                        |                | -21.0                                 |           |                      |                    | 20                             |                |                                           |           |                      | -19                | 60                                 | -32            | -11.4 | -24.2 |       |
| <i>ΔnagC yobF::kan</i> |                                   |           | -21                  |                    |                            |                | -26.7                                 |           |                      |                    | 10                             | -24            |                                           |           |                      | -23                |                                    |                |       | -13.8 |       |
| <i>ΔnagC ackA::kan</i> | -36                               | -25       |                      | 23                 | -35                        |                | -39.4                                 | -24.1     |                      |                    | 19                             |                |                                           |           |                      | 27                 | -16                                |                | -67.2 | -39.9 |       |
| <i>ΔnagC ygaH::kan</i> | -19                               | -22       |                      |                    | -45                        | -65            | -24.7                                 | -66.4     |                      | -11                | -24                            |                |                                           |           |                      | -28                | -68                                |                | -40.8 | 61.7  |       |
| <i>ΔnagC yciW::kan</i> |                                   |           |                      |                    |                            | 54             |                                       | -39.4     |                      | 14                 |                                |                |                                           |           |                      | 21                 | -63                                |                | -14.5 | -35.4 |       |
| <i>ΔptsP typA::kan</i> |                                   |           |                      |                    | 50                         |                |                                       |           |                      |                    |                                |                |                                           |           |                      | 50                 | 8                                  |                | 23.8  |       |       |
| <i>ΔptsP yobF::kan</i> |                                   |           | 10                   | 14                 | 14                         |                | 30.3                                  |           |                      |                    | 15                             |                |                                           |           |                      |                    |                                    |                |       |       |       |
| <i>ΔptsP nagA::kan</i> | 13                                |           |                      | -33                | 23                         |                | -18.0                                 |           |                      | -27                | -24                            |                |                                           |           |                      |                    |                                    |                | -26.8 | -18.1 |       |
| <i>ΔptsP ackA::kan</i> |                                   |           |                      |                    | 14                         |                | 21.7                                  |           |                      |                    |                                |                |                                           |           |                      |                    |                                    |                | -28.3 |       |       |
| <i>ΔptsP ygaH::kan</i> |                                   |           |                      |                    | -51                        | -50            |                                       | -50.6     |                      |                    |                                |                |                                           |           |                      |                    |                                    |                |       |       |       |
| <i>ΔptsP yciW::kan</i> |                                   |           |                      |                    | 14                         | 10             |                                       | 30.6      |                      |                    |                                |                |                                           |           |                      |                    |                                    |                |       |       |       |
| <i>ΔyobF nagA::kan</i> | 16                                | 32        | -31                  |                    |                            |                |                                       |           |                      | -18                |                                |                |                                           |           |                      |                    |                                    |                |       | -9.0  |       |
| <i>ΔyobF ackA::kan</i> |                                   |           | 10                   | 20                 |                            |                | 52.9                                  |           |                      |                    |                                |                |                                           |           |                      |                    |                                    |                |       | -27.2 |       |
| <i>ΔyobF ygaH::kan</i> |                                   |           |                      |                    |                            |                | 50.3                                  | -28.7     |                      |                    |                                |                |                                           |           |                      |                    |                                    |                |       | 43.6  |       |
| <i>ΔyobF yciW::kan</i> |                                   |           |                      |                    |                            |                |                                       |           |                      |                    |                                |                |                                           |           |                      |                    |                                    |                |       | 67.7  |       |
| <i>ΔnagA ackA::kan</i> | -29                               | -18       |                      | 21                 | -20                        |                | -28.4                                 | -12.4     |                      | -45                |                                | 16             |                                           |           |                      | -11                |                                    |                | -28.8 | -42.5 |       |
| <i>ΔnagA ygaH::kan</i> | -14                               | -10       |                      |                    | -30                        | -32            | -12.7                                 | -35.3     |                      | -28                |                                |                |                                           |           |                      |                    |                                    |                | -44   | -27.3 | 51.0  |
| <i>ΔnagA yciW::kan</i> |                                   |           |                      |                    |                            | -38            |                                       |           |                      | -25                | -18                            |                |                                           |           |                      |                    |                                    |                | -51   | -17.1 | -36.2 |
| <i>ΔackA ygaH::kan</i> |                                   |           |                      | -52                | -44                        | -57            | -60                                   | -43.6     | -57.1                |                    |                                |                |                                           |           |                      |                    |                                    |                |       |       | -47.5 |
| <i>ΔackA yciW::kan</i> |                                   |           |                      |                    |                            |                |                                       |           |                      |                    |                                |                |                                           |           |                      |                    |                                    |                |       |       | 79.8  |
| <i>ΔygaH yciW::kan</i> |                                   |           |                      |                    | 19                         | -19            |                                       |           |                      |                    |                                |                |                                           |           |                      |                    |                                    |                |       |       | -     |

1

1 **Fig. S18.** Percent increases in growth rate, percent decreases in lag time, and percent increases in final cell density for strains  
2 containing combinations of deletions in two genes under the stress conditions indicated. For a given strain name  $\Delta A B::kan$ , the  
3 first column for each condition represents the percent change relative to strain  $\Delta A$ , while the second column represents the  
4 percent change relative to strain  $\Delta B$ . Percent changes compared to the background strain W are also listed for condition 1 and  
5 condition 2, where condition 1 is the condition under which the strain containing Tn5 insertion(s) in gene A was originally  
6 isolated, and condition 2 is the condition under which the strain containing Tn5 insertions in gene B was originally isolated.  
7 Only statistically significant values with  $P < 0.05$  are shown, with color shaded according to the value using a green-yellow-red  
8 scale (dark green = 50%, yellow = 0%, dark red = -50%). Strains with positive values in 2 columns for any one condition exhibit  
9 positive epistasis and are outlined in blue. Strains are also highlighted blue if they have increased percentages over strain W in  
10 two conditions.  
11

1

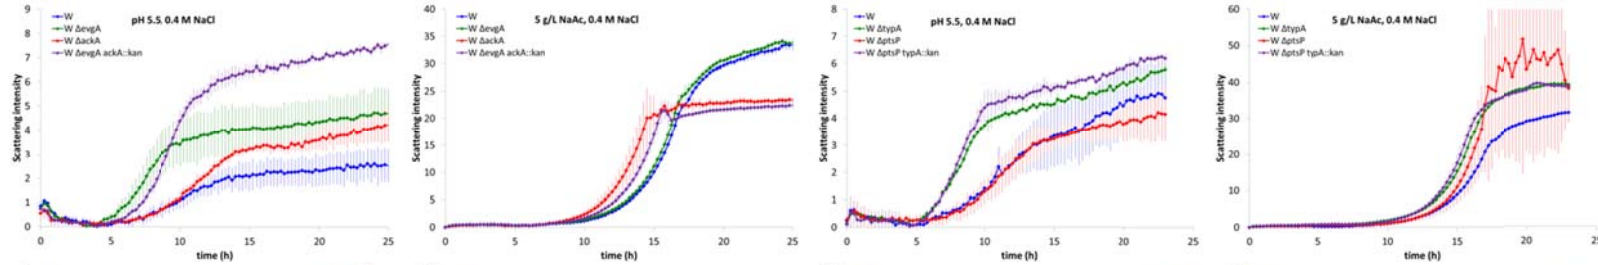

2

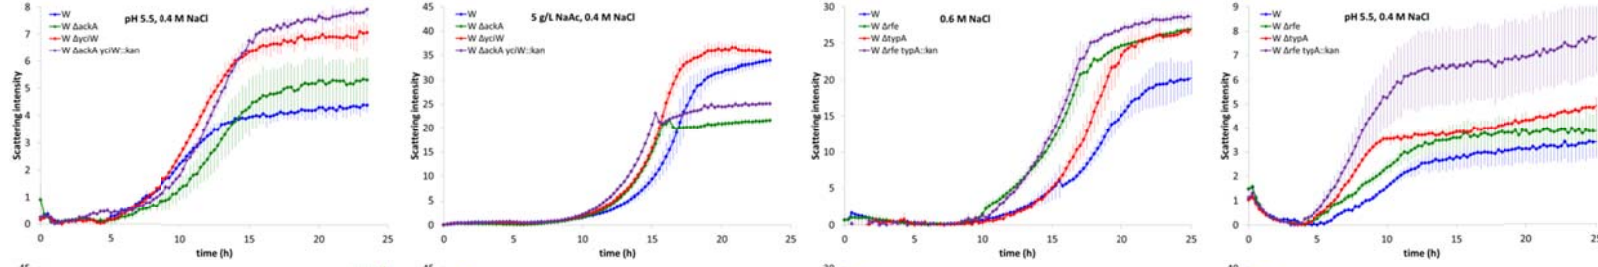

3

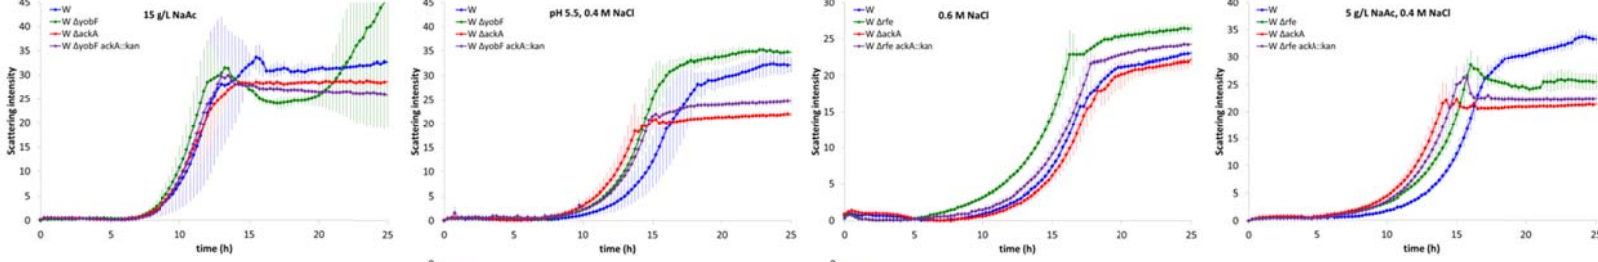

4

**Fig. S19.** Growth curves for selected double deletion strains for conditions indicated. The strains shown are *W ΔevgA ackA::kan* and *W ΔptsP typA::kan* (top row), *W ΔackA yciW::kan* and *W Δrfe typA::kan* (second row), *W ΔyobF ackA::kan* and *W Δrfe ackA::kan* (third row), and *W ΔevgA typA::kan* and *W ΔevgA yciW::kan* (bottom row) under one or two indicated conditions.

1

| strain (1/2/3)                      | % increase in $\mu$ over double KOs 1/2, 1/3, 2/3 |           |                 |               |     | % decrease in $t_{lag}$ over double KOs 1/2, 1/3, 2/3 |           |                 |               |     | % increase in final density over double KOs 1/2, 1/3, 2/3 |           |                 |               |    |
|-------------------------------------|---------------------------------------------------|-----------|-----------------|---------------|-----|-------------------------------------------------------|-----------|-----------------|---------------|-----|-----------------------------------------------------------|-----------|-----------------|---------------|----|
|                                     | 0.6 M NaCl                                        | 15 g/L Ac | 5 g/L Ac, 0.4 M | pH 5.5, 0.4 M |     | 0.6 M NaCl                                            | 15 g/L Ac | 5 g/L Ac, 0.4 M | pH 5.5, 0.4 M |     | 0.6 M NaCl                                                | 15 g/L Ac | 5 g/L Ac, 0.4 M | pH 5.5, 0.4 M |    |
| $\Delta rfe \Delta evgA typA::kan$  |                                                   |           |                 |               | -14 |                                                       |           |                 |               |     |                                                           |           |                 |               |    |
| $\Delta rfe \Delta evgA ptsP::kan$  |                                                   |           |                 | -29           | -39 |                                                       |           |                 |               | 32  |                                                           |           |                 | -20           |    |
| $\Delta rfe \Delta evgA yobF::kan$  | 6                                                 |           |                 |               | 23  |                                                       |           |                 |               |     |                                                           | 14        |                 |               | 29 |
| $\Delta rfe \Delta typA ptsP::kan$  | 13                                                |           |                 |               | -12 |                                                       |           |                 | 15            |     |                                                           |           | 107             |               |    |
| $\Delta rfe \Delta typA yobF::kan$  | 13                                                |           | -17             |               |     |                                                       |           |                 |               |     | 19                                                        |           |                 |               | 19 |
| $\Delta rfe \Delta ptsP yobF::kan$  |                                                   |           | 11              | 9             | -19 |                                                       |           |                 |               |     |                                                           |           |                 | -35           |    |
| $\Delta rfe \Delta ptsP ackA::kan$  |                                                   |           |                 |               | -16 |                                                       |           |                 |               |     |                                                           |           |                 |               |    |
| $\Delta evgA \Delta typA ptsP::kan$ |                                                   |           |                 |               |     |                                                       |           |                 |               |     |                                                           |           |                 |               | 23 |
| $\Delta evgA \Delta typA yobF::kan$ |                                                   |           |                 |               |     |                                                       |           |                 |               |     |                                                           | -7        |                 |               |    |
| $\Delta evgA \Delta typA ackA::kan$ |                                                   |           |                 |               | 13  |                                                       |           |                 |               |     |                                                           |           |                 | 23            |    |
| $\Delta evgA \Delta typA yciW::kan$ |                                                   |           |                 |               |     |                                                       |           |                 |               |     |                                                           |           |                 | 71            | 29 |
| $\Delta evgA \Delta ptsP yobF::kan$ |                                                   |           |                 | 11            |     |                                                       |           |                 | -14           |     |                                                           |           |                 |               | 16 |
| $\Delta evgA \Delta ptsP yciW::kan$ |                                                   |           |                 |               |     |                                                       |           |                 |               |     |                                                           |           |                 |               | 40 |
| $\Delta typA \Delta ptsP yobF::kan$ |                                                   |           |                 |               |     |                                                       |           |                 | 9             |     |                                                           |           | 13              | 11            | 10 |
| $\Delta typA \Delta ptsP ackA::kan$ |                                                   |           |                 |               | -25 |                                                       |           |                 | -28           | -14 |                                                           |           |                 | -25           | 5  |
| $\Delta typA \Delta ptsP yciW::kan$ |                                                   |           |                 |               |     |                                                       |           |                 |               |     |                                                           |           |                 |               | 26 |
| $\Delta evgA \Delta yciW yobF::kan$ |                                                   |           |                 |               |     |                                                       |           |                 |               |     |                                                           |           |                 |               | 43 |
| $\Delta evgA \Delta yciW ackA::kan$ |                                                   |           |                 |               |     |                                                       |           |                 |               |     |                                                           |           |                 |               | 25 |
| $\Delta evgA \Delta yciW ygaH::kan$ |                                                   |           |                 |               |     |                                                       |           |                 |               |     |                                                           |           |                 | 11            | 17 |
| $\Delta typA \Delta yobF ackA::kan$ |                                                   |           |                 |               |     |                                                       |           |                 |               |     |                                                           |           |                 |               | 26 |
| $\Delta typA \Delta yobF yciW::kan$ |                                                   |           |                 |               |     |                                                       |           |                 |               |     |                                                           |           |                 |               | 37 |
| $\Delta typA \Delta yciW ackA::kan$ |                                                   |           |                 |               |     |                                                       |           |                 |               |     |                                                           |           |                 |               | 52 |
| $\Delta ptsP \Delta yobF ackA::kan$ |                                                   |           |                 |               |     |                                                       |           |                 |               |     |                                                           |           |                 |               | 18 |
| $\Delta ptsP \Delta yobF yciW::kan$ |                                                   |           |                 |               |     |                                                       |           |                 |               |     |                                                           |           |                 |               | 8  |
| $\Delta ptsP \Delta yciW ackA::kan$ |                                                   |           |                 |               |     |                                                       |           |                 |               |     |                                                           |           |                 |               | 15 |
| $\Delta ptsP \Delta yciW ackA::kan$ |                                                   |           |                 |               |     |                                                       |           |                 |               |     |                                                           |           |                 |               | 19 |

2

3

4 **Fig. S20.** Percent increase in growth rate for triple knockouts (for W  $\Delta A \Delta B C::kan$ , the first column for each condition is  
 5 compared to W  $\Delta A \Delta B$ , the second column is compared to W  $\Delta A \Delta C$ , and the third column is compared to W  $\Delta B \Delta C$ ). Only  
 6 statistically significant values with  $P < 0.05$  for comparison of the mean values are shown. Gray cells indicate that the condition  
 7 was not tested. The color is shaded according to the value using a green-yellow-red scale (dark green = 50%, yellow = 0%, dark  
 8 red = -50%).

9



| strain                              | percent increase in $\mu$ over W |           |                      |                    | percent decrease in $t_{lag}$ over W |           |                      |                    | percent increase in final density over W |           |                      |                    |
|-------------------------------------|----------------------------------|-----------|----------------------|--------------------|--------------------------------------|-----------|----------------------|--------------------|------------------------------------------|-----------|----------------------|--------------------|
|                                     | 0.6 M NaCl                       | 15 g/L Ac | 5 g/L Ac, 0.4 M NaCl | pH 5.5, 0.4 M NaCl | 0.6 M NaCl                           | 15 g/L Ac | 5 g/L Ac, 0.4 M NaCl | pH 5.5, 0.4 M NaCl | 0.6 M NaCl                               | 15 g/L Ac | 5 g/L Ac, 0.4 M NaCl | pH 5.5, 0.4 M NaCl |
| $\Delta rfe \Delta evgA typA::kan$  | -16                              |           |                      | 25                 | 5                                    |           |                      | 37                 | 14                                       |           |                      | 56                 |
| $\Delta rfe \Delta evgA ptsP::kan$  | -14                              |           | -27                  | 45                 | 28                                   |           | -5                   | 56                 | 17                                       |           | -20                  | 70                 |
| $\Delta rfe \Delta evgA yobF::kan$  | -16                              | -1        |                      | 64                 | 25                                   | 9         |                      | 35                 | 21                                       | -2        |                      | 145                |
| $\Delta rfe \Delta typA ptsP::kan$  | -1                               |           | 10                   | 66                 | 14                                   |           | 17                   | 38                 | 32                                       |           | 9                    | 16                 |
| $\Delta rfe \Delta typA yobF::kan$  | -10                              | -18       |                      | 49                 | 21                                   | 3         |                      | 31                 | 31                                       | -14       |                      | 79                 |
| $\Delta rfe \Delta ptsP yobF::kan$  | -19                              | 7         | 13                   |                    | 15                                   | 1         | 33                   |                    | 19                                       | -4        | -20                  |                    |
| $\Delta rfe \Delta ptsP ackA::kan$  | -16                              |           | 8                    |                    | 26                                   |           | 52                   |                    | 20                                       |           | -15                  |                    |
| $\Delta evgA \Delta typA ptsP::kan$ |                                  |           | 27                   | 56                 |                                      |           | 4                    | 27                 |                                          |           | 17                   | 121                |
| $\Delta evgA \Delta typA yobF::kan$ |                                  | -19       |                      | 157                |                                      | 8         |                      | 16                 |                                          | -20       |                      | 64                 |
| $\Delta evgA \Delta typA ackA::kan$ |                                  |           | 23                   | 87                 |                                      |           | 1                    | 14                 |                                          |           | -16                  | 78                 |
| $\Delta evgA \Delta typA yciW::kan$ |                                  |           |                      | 99                 |                                      |           |                      | 44                 |                                          |           |                      | 134                |
| $\Delta evgA \Delta ptsP yobF::kan$ |                                  | 21        | 45                   | 81                 |                                      | 25        | 4                    | 36                 |                                          | 51        | 23                   | 76                 |
| $\Delta evgA \Delta ptsP yciW::kan$ |                                  |           | 56                   | 119                |                                      |           | 13                   | 30                 |                                          |           | 3                    | 70                 |
| $\Delta typA \Delta ptsP yobF::kan$ |                                  | 2         | 33                   | 92                 |                                      | -1        | 2                    | 27                 |                                          | -11       | 16                   | 105                |
| $\Delta typA \Delta ptsP ackA::kan$ |                                  |           | 29                   | 80                 |                                      |           | 3                    | 8                  |                                          |           | -12                  | 122                |
| $\Delta typA \Delta ptsP yciW::kan$ |                                  |           | 24                   | 70                 |                                      |           | 28                   | 49                 |                                          |           | 15                   | 136                |
| $\Delta evgA \Delta yciW yobF::kan$ |                                  | 9         |                      | 105                |                                      | 35        |                      | 35                 |                                          | -9        |                      | 112                |
| $\Delta evgA \Delta yciW ackA::kan$ |                                  |           | 16                   | 127                |                                      |           | 18                   | 14                 |                                          |           | -26                  | 54                 |
| $\Delta evgA \Delta yciW ygaH::kan$ |                                  |           |                      | 57                 |                                      |           |                      | 19                 |                                          |           |                      | 5                  |
| $\Delta typA \Delta yobF ackA::kan$ |                                  | 13        | 21                   | 56                 |                                      | 12        | 19                   | 17                 |                                          | -36       | -11                  | 91                 |
| $\Delta typA \Delta yobF yciW::kan$ |                                  | -10       |                      | 70                 |                                      | 34        |                      | 41                 |                                          | -14       |                      | 114                |
| $\Delta typA \Delta yciW ackA::kan$ |                                  |           | 12                   | 64                 |                                      |           | 26                   | 19                 |                                          |           | -14                  | 72                 |
| $\Delta ptsP \Delta yobF ackA::kan$ |                                  | 42        | 22                   |                    |                                      | 34        | 19                   |                    |                                          | 9         | -21                  |                    |
| $\Delta ptsP \Delta yobF yciW::kan$ |                                  | 41        | 41                   | 37                 |                                      | 26        | 17                   | 13                 |                                          | -15       | 6                    | 68                 |
| $\Delta ptsP \Delta yciW ackA::kan$ |                                  |           | 25                   | 35                 |                                      |           | 21                   | -10                |                                          |           | -15                  | 60                 |

1

2 **Fig. S21.** Percent increases in growth rate (left), lag time (middle), and final density (right) for triple  
3 knockout strains of W compared to the averaged values from multiple independent experiments for  
4 strain W. Bolded values are statistically significant with  $P < 0.05$ . Gray cells indicate that a condition  
5 was not tested. The color is shaded according to the value using a green-yellow-red scale (dark green =  
6 50%, yellow = 0%, dark red = -50%).

7

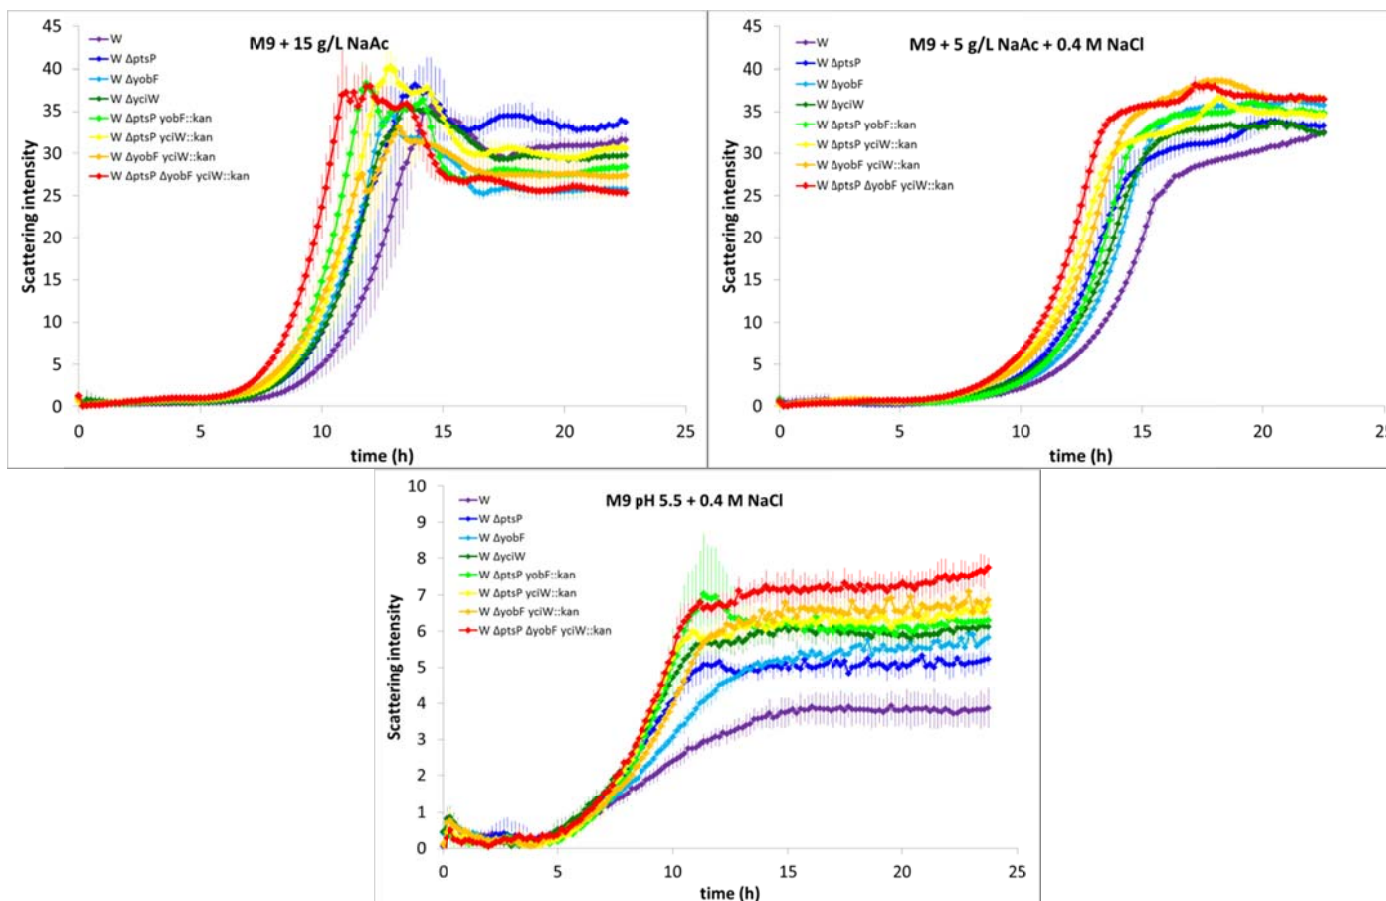

1

2

3 **Fig. S22.** Averaged growth curves for three biological replicates of strain *W ΔptsP ΔyobF yciW::kan* and all comprising single  
 4 and double knockouts under three different conditions (M9 + 15 g/L NaAc, M9 + 5 g/L NaAc + 0.4 M NaCl, and M9 pH 5.5 +  
 5 0.4 M NaCl). *W* was also grown in the same experiment as a control. The error bars represent standard deviations about the  
 6 mean of the scattering intensity at each time measured for the three biological replicates.

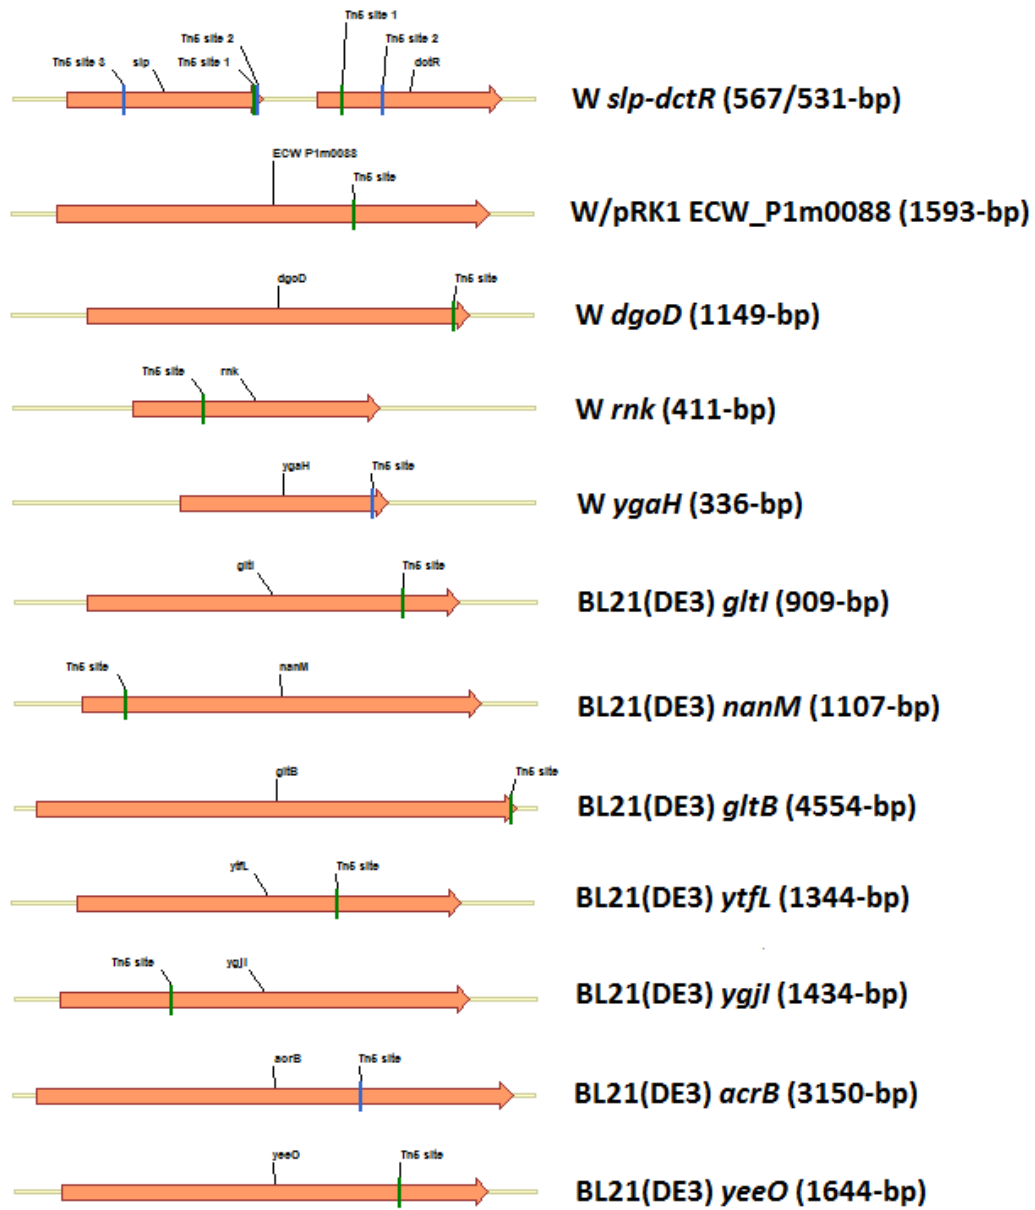

1

2 **Fig. S23.** Gene insertion locations in strains exhibiting improved growth properties under different  
 3 stress conditions (see main text), but for which strains with clean deletions of the gene did not display  
 4 improved growth by either an increased growth rate or reduced lag time.

5

1 **Supplementary References**

- 2 1. **Baba T, Ara T, Hasegawa M, Takai Y, Okumura Y, Baba M, Datsenko KA, Tomita M,**  
3 **Wanner BL, Mori H.** 2006. Construction of *Escherichia coli* K-12 in-frame, single-gene knockout  
4 mutants: the Keio collection. *Mol. Sys. Biol.* **2**:2006.0008.

5
